# Supplementary material for: Lattice distortion-enhanced superlubricity of (Mo, X)S2 (X = Al, Ti, Cr and V) with moiré superlattice
Source: Royal Society of Chemistry journal article supplement (doi:10.1039/d1nr02382a), 2021-01-01
Supplement: d1nr02382a2.zip [file d1nr02382a2.zip]

## Sheet: Sheet1
pure-MoS2		(Mo,Al)S2		(Mo,Ti)S2		(Mo,V)S2		(Mo,Cr)S2
times (s)	friction coefficient	times (s)	friction coefficient	times (s)	friction coefficient	times (s)	friction coefficient	times (s)	friction coefficient
1.06	0.04345	1.06	0.03729	0.95	0.04855	0.95	0.0384	0.97	0.04464
1.22	0.04098	1.2	0.0348	1.11	0.04738	1.09	0.04759	1.11	0.04338
1.36	0.0426	1.36	0.03386	1.26	0.0458	1.25	0.03287	1.27	0.04361
1.52	0.04487	1.52	0.03571	1.42	0.04396	1.41	0.02413	1.42	0.04101
1.67	0.04618	1.66	0.03781	1.56	0.04163	1.56	0.033	1.56	0.04167
1.83	0.04528	1.81	0.03968	1.72	0.03939	1.7	0.03166	1.72	0.04263
1.97	0.04528	1.97	0.04009	1.87	0.037	1.86	0.02525	1.87	0.0442
2.12	0.04477	2.11	0.04103	2.01	0.03628	2.01	0.03401	2.02	0.0441
2.28	0.04443	2.27	0.04149	2.17	0.03619	2.16	0.0293	2.17	0.04365
2.42	0.04404	2.42	0.0419	2.33	0.036	2.31	0.03225	2.33	0.04286
2.58	0.04414	2.56	0.04258	2.47	0.03544	2.47	0.03424	2.47	0.04315
2.73	0.04437	2.72	0.04294	2.62	0.03439	2.61	0.03563	2.62	0.04312
2.87	0.04466	2.87	0.04348	2.78	0.03337	2.76	0.0349	2.78	0.0441
3.03	0.04404	3.02	0.04389	2.92	0.03291	2.92	0.03756	2.94	0.04431
3.19	0.04387	3.17	0.04431	3.08	0.03223	3.06	0.03748	3.08	0.04443
3.33	0.04348	3.33	0.04474	3.23	0.03115	3.22	0.03744	3.24	0.04475
3.48	0.04331	3.48	0.04489	3.37	0.02969	3.37	0.03613	3.39	0.04474
3.64	0.04304	3.62	0.04526	3.53	0.02903	3.53	0.03698	3.53	0.0451
3.8	0.04367	3.78	0.04553	3.69	0.02909	3.67	0.03723	3.69	0.04524
3.94	0.04449	3.94	0.0459	3.83	0.02888	3.83	0.03775	3.84	0.04514
4.09	0.04422	4.08	0.04603	3.98	0.02782	3.98	0.03733	3.99	0.04514
4.25	0.04394	4.23	0.04632	4.14	0.02712	4.12	0.03802	4.14	0.04514
4.39	0.04406	4.39	0.04657	4.3	0.02689	4.28	0.03729	4.3	0.04535
4.55	0.04381	4.53	0.04686	4.44	0.02685	4.44	0.03746	4.44	0.04524
4.7	0.04389	4.69	0.04697	4.59	0.02737	4.58	0.03625	4.59	0.04514
4.84	0.04371	4.84	0.0469	4.75	0.02714	4.73	0.03746	4.75	0.04593
5	0.04343	4.98	0.04715	4.91	0.02643	4.89	0.03773	4.89	0.04585
5.16	0.04267	5.14	0.0474	5.05	0.02635	5.05	0.03742	5.05	0.04614
5.3	0.04258	5.3	0.04769	5.2	0.02668	5.19	0.0368	5.2	0.04622
5.45	0.04244	5.44	0.04782	5.36	0.02745	5.34	0.03657	5.36	0.04614
5.61	0.04244	5.59	0.04798	5.51	0.02685	5.5	0.03798	5.5	0.04547
5.75	0.04215	5.75	0.04813	5.66	0.02593	5.64	0.03923	5.66	0.04491
5.91	0.04209	5.91	0.04813	5.81	0.02587	5.8	0.03825	5.81	0.04479
6.06	0.04234	6.05	0.04807	5.97	0.02637	5.95	0.03821	5.95	0.04527
6.22	0.04306	6.2	0.04773	6.11	0.02579	6.09	0.03899	6.11	0.04512
6.36	0.04313	6.36	0.04798	6.26	0.02496	6.25	0.03937	6.27	0.04518
6.52	0.04329	6.5	0.04815	6.42	0.02458	6.41	0.0398	6.41	0.04529
6.67	0.04341	6.66	0.0485	6.56	0.02496	6.55	0.03937	6.56	0.04549
6.81	0.04308	6.81	0.04854	6.72	0.02527	6.7	0.04008	6.72	0.04589
6.97	0.04323	6.95	0.04879	6.87	0.02525	6.86	0.04124	6.86	0.04606
7.12	0.04312	7.11	0.04906	7.01	0.02421	7	0.04115	7.02	0.04638
7.27	0.04341	7.27	0.04919	7.17	0.02465	7.16	0.0407	7.17	0.04655
7.42	0.04394	7.41	0.0491	7.33	0.02446	7.31	0.04059	7.33	0.04686
7.58	0.04315	7.56	0.04914	7.47	0.02461	7.47	0.04032	7.47	0.04666
7.72	0.04319	7.72	0.04931	7.62	0.02433	7.61	0.04061	7.62	0.04705
7.87	0.04285	7.86	0.04933	7.78	0.02384	7.76	0.04072	7.78	0.04711
8.03	0.043	8.02	0.04931	7.94	0.02342	7.92	0.0414	7.92	0.04665
8.17	0.0435	8.17	0.04921	8.08	0.02369	8.06	0.04207	8.08	0.04684
8.33	0.04345	8.33	0.04923	8.23	0.02431	8.22	0.04132	8.24	0.04674
8.48	0.04323	8.47	0.04923	8.39	0.02386	8.37	0.04211	8.37	0.04728
8.64	0.04319	8.62	0.0494	8.53	0.024	8.51	0.04163	8.53	0.04778
8.78	0.04277	8.78	0.0496	8.69	0.02377	8.67	0.04168	8.69	0.04761
8.94	0.04256	8.92	0.04962	8.84	0.02365	8.83	0.04232	8.84	0.04788
9.09	0.04188	9.08	0.04983	8.98	0.02401	8.97	0.04263	8.99	0.04863
9.23	0.04124	9.23	0.04977	9.14	0.02394	9.12	0.04201	9.14	0.04832
9.39	0.04192	9.37	0.04991	9.3	0.02311	9.28	0.04144	9.3	0.04877
9.55	0.04198	9.53	0.05008	9.45	0.02276	9.42	0.04369	9.44	0.04832
9.69	0.04217	9.69	0.05004	9.59	0.0232	9.58	0.04319	9.59	0.04848
9.84	0.04192	9.83	0.05023	9.75	0.0234	9.73	0.04354	9.75	0.04838
10	0.04211	9.98	0.05021	9.91	0.02319	9.89	0.04363	9.89	0.04846
10.16	0.04223	10.14	0.05023	10.05	0.02282	10.03	0.04464	10.05	0.04817
10.3	0.04184	10.3	0.0501	10.2	0.02245	10.19	0.04413	10.2	0.04786
10.45	0.04146	10.44	0.05039	10.36	0.02294	10.34	0.04427	10.34	0.0473
10.61	0.04192	10.59	0.05035	10.5	0.02334	10.48	0.04474	10.5	0.04765
10.75	0.04244	10.75	0.05048	10.66	0.02295	10.64	0.0441	10.66	0.04699
10.91	0.0414	10.89	0.05023	10.81	0.02236	10.8	0.04452	10.8	0.0473
11.06	0.04211	11.05	0.05054	10.95	0.02259	10.94	0.04448	10.95	0.04807
11.2	0.04098	11.2	0.05068	11.11	0.02311	11.09	0.04458	11.11	0.0477
11.36	0.04096	11.34	0.05097	11.26	0.02295	11.25	0.04468	11.27	0.04776
11.52	0.04105	11.5	0.05089	11.41	0.02255	11.39	0.04568	11.41	0.04651
11.66	0.04061	11.66	0.05108	11.56	0.02189	11.55	0.04527	11.56	0.04585
11.81	0.03982	11.81	0.05104	11.72	0.02236	11.7	0.0447	11.72	0.04541
11.97	0.03955	11.95	0.05101	11.87	0.02261	11.84	0.04429	11.86	0.04549
12.12	0.03928	12.11	0.05124	12.01	0.02292	12	0.04504	12.02	0.04535
12.27	0.04238	12.27	0.05114	12.17	0.02249	12.16	0.04498	12.17	0.0458
12.42	0.04807	12.41	0.05128	12.33	0.02234	12.3	0.04547	12.31	0.04568
12.58	0.04138	12.56	0.05129	12.47	0.02243	12.45	0.04531	12.47	0.04549
12.72	0.03987	12.72	0.05133	12.62	0.02216	12.61	0.04529	12.62	0.04512
12.87	0.03943	12.86	0.05143	12.78	0.02263	12.76	0.04529	12.77	0.04522
13.03	0.04057	13.02	0.05149	12.92	0.02245	12.91	0.04493	12.92	0.04468
13.17	0.04207	13.17	0.05139	13.08	0.0218	13.06	0.04462	13.08	0.04493
13.33	0.04119	13.31	0.05116	13.23	0.02174	13.22	0.04539	13.22	0.04539
13.48	0.04088	13.47	0.05083	13.37	0.02243	13.36	0.04539	13.37	0.04574
13.62	0.04059	13.62	0.05104	13.53	0.02245	13.51	0.04555	13.53	0.04612
13.78	0.04009	13.77	0.05091	13.69	0.02211	13.67	0.04641	13.69	0.04582
13.94	0.03982	13.92	0.05074	13.83	0.02203	13.81	0.04522	13.83	0.04529
14.08	0.03999	14.08	0.05104	13.98	0.0213	13.97	0.04381	13.99	0.04555
14.23	0.04018	14.23	0.05112	14.14	0.02189	14.12	0.04367	14.14	0.04628
14.39	0.04098	14.37	0.05118	14.3	0.02207	14.26	0.04402	14.28	0.04595
14.55	0.04072	14.53	0.05131	14.44	0.02205	14.42	0.04319	14.44	0.04593
14.69	0.0403	14.69	0.05135	14.59	0.02145	14.58	0.043	14.59	0.0463
14.84	0.04013	14.83	0.05137	14.75	0.02093	14.73	0.04265	14.74	0.04695
15	0.0397	14.98	0.05137	14.89	0.0218	14.87	0.04275	14.89	0.04653
15.14	0.03984	15.14	0.05153	15.05	0.02209	15.03	0.04336	15.05	0.04689
15.3	0.04005	15.28	0.05155	15.2	0.02182	15.19	0.04232	15.19	0.04701
15.45	0.04013	15.44	0.05189	15.34	0.02137	15.33	0.0423	15.34	0.04738
15.59	0.04086	15.59	0.05191	15.5	0.02178	15.48	0.0417	15.5	0.04713
15.75	0.03932	15.73	0.05178	15.66	0.02197	15.64	0.04134	15.64	0.04763
15.91	0.03858	15.89	0.05191	15.8	0.02243	15.8	0.04138	15.8	0.04728
16.05	0.03839	16.05	0.05191	15.95	0.02216	15.94	0.04089	15.95	0.04746
16.2	0.03779	16.2	0.05178	16.11	0.02101	16.09	0.03991	16.11	0.04757
16.36	0.03739	16.34	0.05193	16.26	0.02137	16.25	0.03968	16.25	0.04699
16.52	0.03818	16.5	0.05207	16.41	0.02195	16.39	0.03956	16.41	0.04682
16.66	0.03847	16.66	0.05187	16.56	0.0218	16.55	0.0396	16.56	0.04728
16.81	0.03833	16.81	0.05183	16.72	0.02126	16.7	0.03935	16.72	0.04732
16.97	0.03949	16.95	0.05164	16.86	0.02133	16.86	0.03914	16.86	0.04746
17.12	0.03939	17.11	0.05176	17.01	0.02156	17	0.03881	17.02	0.04742
17.28	0.03922	17.27	0.05168	17.17	0.02211	17.16	0.03839	17.17	0.04705
17.42	0.03787	17.42	0.05189	17.33	0.02222	17.31	0.03835	17.33	0.04672
17.58	0.03901	17.56	0.05159	17.47	0.02164	17.47	0.03842	17.47	0.04747
17.73	0.03841	17.72	0.05159	17.62	0.02107	17.61	0.03842	17.62	0.04782
17.87	0.03793	17.87	0.0517	17.78	0.02097	17.76	0.03866	17.78	0.04836
18.03	0.03742	18.03	0.05189	17.94	0.02201	17.92	0.0384	17.94	0.04792
18.19	0.03731	18.17	0.05193	18.08	0.02205	18.06	0.03785	18.08	0.04765
18.34	0.03694	18.33	0.05178	18.23	0.02156	18.22	0.03789	18.24	0.04753
18.5	0.03696	18.48	0.05182	18.39	0.02149	18.37	0.038	18.39	0.04757
18.64	0.03557	18.64	0.05178	18.55	0.02147	18.53	0.03758	18.55	0.04738
18.8	0.03521	18.78	0.05199	18.69	0.02195	18.7	0.03648	18.69	0.04699
18.95	0.03567	18.94	0.05193	18.84	0.02166	18.84	0.03673	18.84	0.04641
19.09	0.03561	19.09	0.05178	19	0.0211	19	0.03657	19	0.04672
19.25	0.03521	19.25	0.05183	19.16	0.02108	19.16	0.03623	19.16	0.04693
19.41	0.03569	19.41	0.05197	19.3	0.02101	19.3	0.03638	19.3	0.04726
19.56	0.03592	19.55	0.05209	19.45	0.02143	19.45	0.03654	19.45	0.0483
19.7	0.03582	19.7	0.05209	19.61	0.02155	19.61	0.03675	19.61	0.04815
19.86	0.03523	19.86	0.05199	19.76	0.02095	19.76	0.03648	19.77	0.04855
20.02	0.03461	20.02	0.0523	19.92	0.0212	19.92	0.03592	19.92	0.04865
20.17	0.0338	20.16	0.05214	20.06	0.02097	20.06	0.03623	20.06	0.04838
20.33	0.03361	20.31	0.0521	20.22	0.02137	20.22	0.03567	20.22	0.04848
20.47	0.0354	20.47	0.05189	20.37	0.02155	20.37	0.03611	20.37	0.04769
20.62	0.03625	20.62	0.05168	20.53	0.02099	20.53	0.03628	20.53	0.04763
20.78	0.03571	20.78	0.05147	20.67	0.02083	20.67	0.03611	20.67	0.0478
20.92	0.03532	20.92	0.05137	20.83	0.0212	20.83	0.03575	20.83	0.04682
21.08	0.03484	21.08	0.05157	20.98	0.02135	20.98	0.03507	20.99	0.04699
21.23	0.03544	21.23	0.05159	21.14	0.02162	21.14	0.03576	21.14	0.04715
21.39	0.04011	21.37	0.05135	21.3	0.02099	21.3	0.03597	21.28	0.04711
21.55	0.03798	21.53	0.05068	21.44	0.02056	21.45	0.03559	21.44	0.0472
21.69	0.03636	21.69	0.05085	21.59	0.02103	21.59	0.03563	21.59	0.04755
21.84	0.0358	21.84	0.05097	21.75	0.02132	21.75	0.03582	21.75	0.04788
22	0.03555	21.98	0.05135	21.91	0.02112	21.91	0.03542	21.89	0.04767
22.16	0.0353	22.14	0.05129	22.05	0.02049	22.06	0.03486	22.05	0.04786
22.3	0.037	22.3	0.05139	22.2	0.02033	22.22	0.03482	22.2	0.04794
22.45	0.0365	22.45	0.05135	22.36	0.02074	22.36	0.03567	22.36	0.04792
22.61	0.03706	22.59	0.05149	22.5	0.02168	22.51	0.03518	22.52	0.04753
22.77	0.03604	22.75	0.05129	22.66	0.02156	22.67	0.03497	22.66	0.04786
22.92	0.0354	22.91	0.05147	22.81	0.02132	22.81	0.03528	22.81	0.04763
23.06	0.03444	23.06	0.05145	22.97	0.02103	22.97	0.0358	22.97	0.04784
23.22	0.03482	23.2	0.05143	23.12	0.02085	23.12	0.03528	23.11	0.04792
23.37	0.03422	23.36	0.05137	23.26	0.02126	23.28	0.03488	23.27	0.04802
23.53	0.03387	23.52	0.05137	23.42	0.02135	23.42	0.03507	23.42	0.04792
23.67	0.03349	23.67	0.05131	23.58	0.02095	23.58	0.03516	23.58	0.04828
23.83	0.03455	23.81	0.05129	23.72	0.02068	23.73	0.03547	23.72	0.04879
23.98	0.03434	23.97	0.05131	23.87	0.02112	23.89	0.03513	23.87	0.04821
24.14	0.03359	24.12	0.05124	24.03	0.02128	24.05	0.03518	24.03	0.04805
24.28	0.0332	24.28	0.05122	24.19	0.02178	24.2	0.03486	24.19	0.04742
24.44	0.03351	24.44	0.05114	24.33	0.02155	24.36	0.03499	24.34	0.04755
24.59	0.03472	24.58	0.05116	24.48	0.02105	24.5	0.03484	24.49	0.048
24.75	0.03446	24.73	0.05104	24.64	0.02133	24.66	0.03534	24.64	0.04701
24.91	0.03403	24.89	0.05131	24.8	0.02158	24.81	0.03538	24.8	0.04599
25.05	0.03413	25.05	0.05133	24.95	0.0213	24.97	0.03551	24.94	0.04612
25.2	0.03413	25.19	0.05141	25.09	0.02077	25.12	0.03561	25.09	0.04606
25.36	0.03449	25.34	0.05151	25.25	0.02089	25.26	0.03495	25.25	0.04614
25.5	0.03434	25.5	0.05149	25.41	0.02147	25.42	0.03451	25.41	0.04608
25.66	0.03488	25.66	0.05143	25.56	0.02184	25.58	0.0343	25.55	0.04585
25.81	0.03382	25.8	0.05159	25.7	0.0222	25.73	0.03403	25.7	0.04614
25.97	0.03461	25.95	0.05151	25.86	0.02193	25.87	0.03433	25.86	0.0463
26.12	0.03472	26.11	0.05153	26.01	0.0218	26.03	0.03447	26.02	0.04626
26.27	0.03509	26.27	0.0517	26.17	0.0216	26.19	0.0343	26.17	0.04614
26.42	0.0348	26.41	0.05162	26.31	0.02162	26.34	0.03401	26.31	0.04606
26.58	0.03499	26.56	0.05159	26.47	0.02197	26.5	0.03358	26.47	0.04626
26.72	0.03436	26.72	0.05149	26.62	0.02124	26.64	0.03293	26.62	0.04616
26.87	0.0344	26.87	0.05137	26.78	0.02118	26.8	0.03302	26.78	0.04616
27.03	0.03501	27.03	0.05153	26.92	0.0218	26.95	0.03372	26.92	0.04582
27.19	0.03563	27.17	0.05162	27.08	0.02207	27.11	0.03349	27.08	0.04603
27.33	0.03569	27.33	0.05135	27.23	0.02257	27.25	0.03297	27.24	0.04583
27.48	0.03571	27.48	0.05122	27.39	0.02226	27.41	0.03322	27.39	0.04606
27.64	0.03619	27.64	0.05116	27.55	0.0217	27.56	0.03333	27.55	0.04649
27.8	0.03582	27.78	0.05118	27.69	0.02162	27.72	0.03299	27.69	0.04663
27.95	0.03434	27.94	0.05126	27.84	0.02232	27.86	0.03405	27.84	0.04665
28.09	0.03517	28.09	0.05143	28	0.02203	28.01	0.03391	28	0.04572
28.25	0.03654	28.25	0.05151	28.16	0.02128	28.17	0.03449	28.16	0.04501
28.41	0.03575	28.41	0.05143	28.3	0.02077	28.33	0.03407	28.3	0.04483
28.55	0.03592	28.55	0.05135	28.45	0.02126	28.47	0.03306	28.45	0.04541
28.7	0.03631	28.7	0.05141	28.61	0.02172	28.62	0.03403	28.61	0.04539
28.86	0.03669	28.86	0.05139	28.76	0.02184	28.78	0.03409	28.77	0.04568
29.02	0.03625	29	0.05133	28.92	0.02184	28.94	0.0338	28.91	0.04555
29.17	0.03604	29.16	0.05126	29.06	0.02188	29.09	0.03387	29.06	0.04641
29.31	0.03565	29.31	0.05131	29.22	0.02189	29.23	0.03391	29.22	0.04638
29.47	0.03555	29.47	0.05118	29.37	0.02239	29.39	0.03412	29.37	0.04651
29.62	0.03575	29.61	0.05131	29.53	0.02241	29.55	0.03418	29.52	0.04659
29.78	0.03592	29.77	0.05139	29.67	0.02168	29.69	0.03411	29.67	0.04707
29.92	0.03582	29.92	0.05143	29.83	0.02099	29.84	0.03414	29.83	0.04643
30.08	0.03594	30.08	0.05149	29.98	0.02137	30	0.03354	29.99	0.04665
30.23	0.03613	30.22	0.05157	30.12	0.02143	30.16	0.0335	30.14	0.04695
30.39	0.03594	30.37	0.05155	30.28	0.02182	30.3	0.03352	30.28	0.04689
30.55	0.03598	30.53	0.05149	30.44	0.0216	30.45	0.03331	30.44	0.04703
30.69	0.03652	30.69	0.05139	30.59	0.02135	30.61	0.03401	30.59	0.04665
30.84	0.03679	30.83	0.05143	30.75	0.02141	30.76	0.03409	30.74	0.04618
31	0.03679	30.98	0.05159	30.89	0.02188	30.92	0.03397	30.89	0.04653
31.16	0.03663	31.14	0.05166	31.05	0.02216	31.06	0.0348	31.05	0.04562
31.3	0.03702	31.3	0.05151	31.2	0.02176	31.22	0.03407	31.2	0.04514
31.45	0.03748	31.44	0.05147	31.34	0.02143	31.37	0.03389	31.34	0.04531
31.61	0.0374	31.59	0.05137	31.5	0.02153	31.51	0.03412	31.5	0.04491
31.77	0.03665	31.75	0.0512	31.66	0.02207	31.67	0.03385	31.66	0.0452
31.91	0.03646	31.91	0.05129	31.81	0.02155	31.83	0.03422	31.81	0.04537
32.06	0.03623	32.05	0.05129	31.95	0.0212	31.98	0.03368	31.97	0.04525
32.22	0.0361	32.2	0.05124	32.11	0.0216	32.12	0.03308	32.11	0.04514
32.37	0.03602	32.36	0.05114	32.26	0.02151	32.28	0.03328	32.27	0.04481
32.53	0.03658	32.52	0.05099	32.42	0.0218	32.44	0.03374	32.42	0.04398
32.67	0.03619	32.66	0.05083	32.58	0.02195	32.59	0.03366	32.56	0.04448
32.83	0.03592	32.81	0.05072	32.72	0.02135	32.75	0.0335	32.72	0.04568
32.98	0.03675	32.97	0.05095	32.87	0.02122	32.89	0.03345	32.87	0.04624
33.12	0.03596	33.12	0.05097	33.03	0.02145	33.05	0.03376	33.03	0.04606
33.28	0.03542	33.28	0.0512	33.19	0.02228	33.2	0.03416	33.17	0.04628
33.44	0.0354	33.42	0.05104	33.33	0.02218	33.36	0.03356	33.33	0.04616
33.59	0.03548	33.58	0.05091	33.48	0.02211	33.5	0.03389	33.49	0.04655
33.75	0.03476	33.73	0.0508	33.64	0.02153	33.66	0.03328	33.64	0.04659
33.89	0.03463	33.89	0.05099	33.8	0.02139	33.81	0.03297	33.8	0.04651
34.05	0.03469	34.03	0.05095	33.94	0.02199	33.97	0.0333	33.94	0.04663
34.2	0.03478	34.19	0.05091	34.09	0.02224	34.12	0.03345	34.09	0.04676
34.34	0.03521	34.34	0.05093	34.25	0.02178	34.26	0.0338	34.25	0.04661
34.5	0.03497	34.5	0.05114	34.41	0.0216	34.42	0.0337	34.41	0.04634
34.66	0.03501	34.66	0.05116	34.55	0.02166	34.58	0.03326	34.55	0.04595
34.81	0.03438	34.8	0.05129	34.7	0.02184	34.73	0.03339	34.7	0.04678
34.95	0.03434	34.95	0.05126	34.86	0.02176	34.87	0.03341	34.86	0.04676
35.11	0.03515	35.11	0.05149	35.01	0.02105	35.03	0.03333	35.02	0.04734
35.27	0.03484	35.25	0.05153	35.17	0.02139	35.19	0.03324	35.17	0.04711
35.42	0.03457	35.41	0.05141	35.31	0.02137	35.34	0.03314	35.31	0.04666
35.58	0.03413	35.56	0.05159	35.47	0.02189	35.48	0.03358	35.47	0.04655
35.72	0.03407	35.72	0.05162	35.62	0.02213	35.64	0.03352	35.62	0.04672
35.87	0.0342	35.86	0.05172	35.78	0.02155	35.8	0.03269	35.78	0.04697
36.03	0.03432	36.02	0.05147	35.92	0.02126	35.95	0.03312	35.92	0.04709
36.17	0.0348	36.17	0.05193	36.08	0.02155	36.09	0.03299	36.08	0.04744
36.33	0.03451	36.33	0.05199	36.23	0.02199	36.25	0.03291	36.24	0.04711
36.48	0.03416	36.47	0.05214	36.39	0.02184	36.41	0.03328	36.39	0.04749
36.64	0.03399	36.62	0.05224	36.55	0.02155	36.56	0.03395	36.53	0.04724
36.8	0.03368	36.78	0.05232	36.69	0.02141	36.72	0.03343	36.69	0.04724
36.94	0.03372	36.94	0.05232	36.84	0.02193	36.86	0.03331	36.84	0.04705
37.09	0.0344	37.08	0.05212	37	0.02236	37.01	0.03358	37	0.04701
37.25	0.03446	37.23	0.05195	37.16	0.02272	37.17	0.03381	37.14	0.04711
37.41	0.03451	37.39	0.05161	37.3	0.02224	37.31	0.03306	37.3	0.04778
37.55	0.03399	37.55	0.05185	37.45	0.02211	37.47	0.03299	37.45	0.0478
37.7	0.03382	37.69	0.05207	37.61	0.02263	37.62	0.03279	37.61	0.04803
37.86	0.03361	37.84	0.05216	37.75	0.0227	37.78	0.03235	37.77	0.04765
38.02	0.03363	38	0.05218	37.91	0.02218	37.92	0.03268	37.91	0.04751
38.17	0.03368	38.16	0.05205	38.06	0.02188	38.08	0.03297	38.06	0.04769
38.31	0.03403	38.31	0.05199	38.22	0.02145	38.23	0.03295	38.22	0.04769
38.47	0.03363	38.45	0.05176	38.37	0.02172	38.39	0.03297	38.36	0.04757
38.62	0.03366	38.61	0.05182	38.51	0.02214	38.55	0.03328	38.52	0.04688
38.78	0.03393	38.77	0.05153	38.67	0.02228	38.69	0.03275	38.67	0.04707
38.92	0.03505	38.92	0.05182	38.83	0.02191	38.84	0.03252	38.83	0.0468
39.08	0.03517	39.06	0.05172	38.98	0.02203	39	0.03218	38.97	0.04705
39.23	0.03467	39.22	0.05155	39.12	0.02228	39.14	0.03239	39.12	0.04709
39.39	0.03428	39.37	0.05191	39.28	0.02236	39.3	0.03268	39.28	0.04722
39.53	0.03407	39.53	0.05161	39.44	0.02265	39.45	0.03256	39.44	0.04715
39.69	0.03424	39.67	0.0517	39.59	0.0223	39.61	0.03258	39.59	0.0473
39.84	0.03444	39.83	0.05185	39.73	0.02267	39.75	0.03283	39.74	0.04749
40	0.03438	39.98	0.05201	39.89	0.02313	39.91	0.03247	39.89	0.04784
40.16	0.03453	40.14	0.05182	40.05	0.02334	40.06	0.03229	40.05	0.04742
40.3	0.03447	40.28	0.05191	40.2	0.02272	40.22	0.03245	40.19	0.04728
40.45	0.03389	40.44	0.05172	40.34	0.02207	40.37	0.03204	40.34	0.04697
40.61	0.03386	40.59	0.05172	40.5	0.02209	40.51	0.03192	40.5	0.04697
40.75	0.03395	40.75	0.05157	40.66	0.02269	40.67	0.03216	40.66	0.04689
40.91	0.03436	40.91	0.05183	40.81	0.02274	40.83	0.03237	40.8	0.04738
41.06	0.03434	41.05	0.05226	40.95	0.02247	40.98	0.03273	40.95	0.04763
41.22	0.03384	41.2	0.05226	41.11	0.02249	41.12	0.03281	41.11	0.04774
41.37	0.03333	41.36	0.05203	41.26	0.02216	41.28	0.03262	41.27	0.048
41.52	0.03357	41.52	0.05201	41.42	0.02245	41.44	0.03275	41.42	0.04794
41.67	0.03418	41.66	0.05201	41.56	0.02247	41.59	0.03271	41.56	0.0477
41.83	0.03418	41.81	0.05174	41.72	0.02307	41.75	0.03269	41.72	0.04776
41.97	0.03403	41.97	0.05195	41.87	0.02228	41.89	0.03254	41.87	0.04809
42.12	0.03328	42.12	0.05199	42.03	0.02228	42.05	0.03322	42.03	0.04834
42.28	0.03306	42.28	0.05218	42.17	0.02251	42.2	0.03312	42.17	0.04828
42.44	0.03345	42.42	0.05178	42.33	0.02222	42.36	0.03289	42.33	0.04815
42.58	0.03343	42.58	0.05201	42.48	0.02216	42.5	0.03314	42.49	0.04767
42.73	0.0333	42.73	0.05205	42.64	0.02213	42.66	0.03331	42.64	0.04715
42.89	0.03318	42.89	0.05183	42.8	0.02203	42.81	0.03299	42.8	0.04755
43.05	0.03368	43.03	0.0518	42.94	0.0223	42.97	0.03364	42.94	0.04774
43.2	0.03451	43.19	0.05197	43.09	0.02245	43.11	0.03343	43.09	0.04774
43.34	0.03474	43.34	0.05203	43.25	0.02201	43.26	0.03318	43.25	0.04738
43.5	0.03474	43.5	0.05201	43.41	0.02151	43.42	0.03285	43.41	0.04765
43.66	0.03497	43.66	0.05166	43.55	0.02186	43.58	0.03297	43.55	0.04761
43.8	0.03513	43.8	0.05141	43.7	0.02209	43.72	0.03328	43.7	0.0479
43.95	0.03486	43.95	0.05108	43.86	0.02199	43.87	0.03349	43.86	0.04749
44.11	0.03521	44.11	0.05126	44.01	0.02201	44.03	0.03322	44.02	0.04747
44.27	0.03505	44.25	0.05129	44.17	0.02216	44.19	0.03271	44.16	0.04726
44.42	0.03459	44.41	0.05131	44.31	0.02216	44.34	0.03264	44.31	0.04738
44.56	0.03488	44.56	0.05128	44.47	0.02232	44.48	0.03339	44.47	0.04719
44.72	0.03499	44.72	0.05133	44.62	0.02259	44.64	0.0332	44.62	0.04719
44.87	0.03551	44.86	0.05162	44.78	0.02236	44.8	0.03324	44.77	0.04688
45.03	0.03536	45.02	0.05162	44.92	0.02213	44.94	0.0336	44.92	0.04688
45.17	0.03555	45.17	0.05185	45.08	0.02211	45.09	0.03374	45.08	0.04713
45.33	0.03561	45.33	0.05242	45.23	0.02249	45.25	0.03347	45.24	0.04703
45.48	0.0354	45.47	0.0522	45.37	0.02282	45.41	0.03326	45.39	0.04759
45.64	0.03538	45.62	0.05195	45.53	0.02282	45.55	0.03304	45.55	0.04707
45.8	0.03534	45.78	0.05218	45.69	0.02249	45.7	0.03337	45.69	0.04703
45.94	0.03494	45.94	0.05232	45.84	0.02222	45.86	0.03391	45.84	0.04616
46.09	0.0355	46.08	0.05242	46	0.0228	46.01	0.03337	46	0.04676
46.25	0.03608	46.23	0.05216	46.14	0.02251	46.17	0.0337	46.16	0.04697
46.41	0.0353	46.39	0.05228	46.3	0.02241	46.31	0.0337	46.31	0.04661
46.55	0.03469	46.55	0.05251	46.45	0.02239	46.47	0.03389	46.45	0.04653
46.7	0.03465	46.69	0.05245	46.59	0.02269	46.62	0.03391	46.61	0.04649
46.86	0.03509	46.84	0.05195	46.75	0.02286	46.76	0.03395	46.77	0.04711
47.02	0.03513	47	0.05203	46.91	0.02261	46.92	0.03412	46.92	0.04695
47.16	0.03517	47.16	0.05216	47.06	0.02265	47.08	0.03432	47.06	0.04744
47.31	0.03461	47.31	0.05226	47.2	0.02249	47.23	0.03428	47.22	0.04749
47.47	0.03432	47.45	0.05242	47.36	0.02282	47.37	0.0338	47.37	0.04763
47.62	0.03472	47.61	0.05228	47.51	0.02311	47.53	0.03354	47.53	0.04761
47.78	0.03478	47.77	0.0524	47.67	0.02292	47.69	0.03345	47.67	0.04761
47.92	0.03501	47.92	0.05238	47.83	0.02249	47.84	0.03343	47.83	0.04705
48.08	0.0348	48.06	0.05247	47.97	0.02238	48	0.03316	47.99	0.04693
48.23	0.03461	48.22	0.05251	48.12	0.02234	48.14	0.03318	48.14	0.04691
48.39	0.03484	48.37	0.05249	48.28	0.02261	48.3	0.03354	48.3	0.04701
48.55	0.0348	48.53	0.0524	48.44	0.02236	48.45	0.03366	48.44	0.04693
48.7	0.03469	48.69	0.0528	48.58	0.02241	48.61	0.03291	48.59	0.04719
48.84	0.03467	48.83	0.05266	48.73	0.02245	48.75	0.03291	48.75	0.04715
49	0.03463	48.98	0.05265	48.89	0.02249	48.91	0.03326	48.91	0.04707
49.16	0.0344	49.14	0.05268	49.05	0.02251	49.06	0.03293	49.06	0.04701
49.31	0.03465	49.3	0.05305	49.19	0.02238	49.22	0.03295	49.2	0.04674
49.47	0.03469	49.45	0.05293	49.34	0.02214	49.37	0.03299	49.36	0.04701
49.61	0.03532	49.61	0.05238	49.5	0.02261	49.51	0.0332	49.52	0.04719
49.77	0.03544	49.75	0.05255	49.66	0.02274	49.67	0.0332	49.67	0.04703
49.92	0.03527	49.91	0.05247	49.81	0.02288	49.83	0.03328	49.83	0.04744
50.08	0.03499	50.06	0.05253	49.95	0.02218	49.98	0.03322	49.97	0.04711
50.23	0.03476	50.22	0.05249	50.11	0.02239	50.14	0.03283	50.12	0.04641
50.37	0.03434	50.37	0.05228	50.26	0.02232	50.3	0.03356	50.28	0.04587
50.53	0.03438	50.52	0.05232	50.42	0.02257	50.44	0.03341	50.44	0.04657
50.69	0.03449	50.67	0.05251	50.58	0.02301	50.59	0.03281	50.59	0.04649
50.84	0.03386	50.83	0.05243	50.72	0.02257	50.75	0.03279	50.75	0.04606
51	0.0338	50.98	0.05212	50.87	0.02226	50.91	0.03322	50.89	0.04589
51.16	0.03363	51.14	0.0522	51.03	0.02286	51.06	0.03328	51.05	0.04672
51.3	0.03391	51.28	0.05272	51.19	0.02288	51.2	0.03306	51.2	0.04697
51.45	0.03411	51.44	0.05253	51.34	0.02269	51.36	0.03304	51.36	0.04719
51.61	0.03393	51.59	0.05197	51.5	0.02247	51.51	0.03237	51.52	0.04684
51.77	0.03403	51.75	0.05174	51.64	0.02226	51.67	0.03208	51.66	0.04699
51.92	0.03407	51.91	0.05214	51.8	0.02261	51.83	0.0326	51.81	0.04705
52.08	0.03432	52.06	0.05234	51.95	0.02299	51.97	0.03264	51.97	0.04734
52.22	0.03442	52.2	0.05238	52.11	0.02245	52.12	0.03312	52.12	0.04676
52.37	0.03387	52.36	0.05245	52.26	0.02224	52.28	0.03295	52.28	0.0462
52.53	0.0338	52.52	0.0522	52.41	0.02205	52.44	0.03245	52.42	0.04659
52.69	0.03403	52.67	0.05234	52.56	0.0229	52.59	0.03237	52.58	0.04699
52.84	0.03393	52.83	0.05243	52.72	0.02278	52.75	0.03243	52.74	0.04661
52.98	0.03401	52.97	0.05197	52.87	0.02261	52.89	0.03229	52.89	0.04614
53.14	0.03451	53.12	0.05168	53.03	0.02213	53.05	0.03256	53.05	0.04608
53.3	0.03459	53.28	0.05205	53.17	0.02199	53.2	0.03318	53.19	0.04622
53.45	0.03428	53.44	0.05243	53.33	0.0222	53.36	0.0331	53.34	0.04651
53.61	0.03411	53.59	0.05191	53.48	0.02251	53.51	0.03273	53.5	0.04614
53.75	0.03405	53.73	0.05153	53.64	0.02255	53.66	0.03271	53.66	0.04653
53.91	0.0344	53.89	0.05214	53.8	0.02222	53.81	0.03285	53.81	0.04616
54.06	0.03455	54.05	0.05265	53.95	0.0223	53.97	0.03283	53.97	0.04595
54.22	0.03467	54.2	0.05255	54.09	0.02267	54.12	0.03254	54.11	0.04557
54.37	0.0349	54.36	0.05228	54.25	0.02255	54.28	0.03212	54.27	0.04576
54.52	0.03486	54.5	0.05228	54.41	0.02272	54.42	0.03192	54.42	0.04603
54.67	0.03478	54.66	0.0523	54.56	0.02216	54.58	0.03208	54.58	0.04597
54.83	0.03494	54.81	0.05183	54.72	0.02203	54.73	0.03256	54.74	0.04583
54.98	0.03484	54.97	0.05126	54.86	0.02226	54.89	0.03285	54.87	0.04643
55.14	0.03461	55.12	0.05162	55.01	0.02253	55.05	0.03316	55.03	0.04626
55.28	0.03442	55.27	0.05197	55.17	0.02188	55.2	0.03299	55.19	0.04663
55.44	0.0344	55.42	0.05222	55.33	0.02191	55.34	0.03331	55.34	0.04634
55.59	0.03444	55.58	0.05251	55.48	0.02189	55.5	0.03345	55.5	0.04645
55.75	0.03434	55.73	0.05236	55.62	0.02257	55.66	0.03368	55.64	0.04645
55.91	0.03453	55.89	0.05197	55.78	0.02267	55.81	0.03281	55.8	0.04624
56.06	0.03463	56.03	0.05185	55.94	0.02216	55.97	0.03339	55.95	0.04605
56.2	0.03492	56.19	0.05176	56.09	0.02191	56.11	0.0331	56.11	0.04587
56.36	0.03474	56.34	0.05187	56.25	0.02214	56.26	0.03293	56.27	0.04572
56.52	0.03447	56.5	0.05209	56.39	0.02263	56.42	0.03333	56.42	0.04614
56.67	0.0344	56.66	0.05183	56.55	0.02247	56.58	0.03341	56.56	0.04618
56.83	0.03438	56.81	0.05207	56.7	0.02224	56.73	0.0335	56.72	0.04634
56.97	0.03453	56.95	0.05228	56.86	0.02247	56.87	0.03345	56.87	0.04599
57.12	0.03517	57.11	0.05187	57.01	0.02255	57.03	0.03269	57.03	0.04634
57.28	0.0354	57.27	0.05172	57.16	0.02253	57.19	0.03285	57.19	0.04583
57.44	0.03509	57.42	0.05174	57.31	0.02195	57.34	0.03237	57.33	0.04545
57.59	0.03515	57.58	0.05236	57.47	0.02211	57.5	0.03252	57.49	0.04524
57.75	0.03511	57.73	0.05253	57.62	0.02211	57.64	0.03271	57.64	0.0456
57.89	0.03517	57.87	0.05261	57.78	0.02261	57.8	0.03229	57.8	0.04506
58.05	0.03511	58.03	0.05245	57.94	0.02261	57.95	0.03275	57.95	0.04502
58.2	0.03513	58.19	0.05218	58.08	0.02214	58.11	0.03275	58.09	0.04487
58.36	0.03495	58.34	0.05249	58.23	0.02158	58.26	0.03243	58.25	0.04491
58.5	0.03478	58.5	0.05234	58.39	0.02203	58.42	0.03271	58.41	0.04514
58.66	0.03467	58.64	0.05228	58.55	0.02211	58.56	0.03314	58.56	0.04493
58.81	0.03482	58.8	0.05216	58.7	0.02207	58.72	0.03302	58.72	0.04499
58.97	0.03484	58.95	0.0524	58.84	0.02182	58.87	0.03254	58.87	0.04479
59.12	0.03453	59.11	0.05282	59	0.02186	59.03	0.0319	59.02	0.04549
59.28	0.03486	59.27	0.05288	59.16	0.02172	59.19	0.03192	59.17	0.04549
59.42	0.03486	59.41	0.05344	59.31	0.02141	59.33	0.032	59.33	0.04557
59.58	0.03495	59.56	0.0533	59.47	0.02124	59.48	0.03188	59.49	0.04539
59.73	0.03495	59.72	0.05317	59.62	0.02122	59.64	0.03183	59.64	0.04525
59.89	0.03511	59.87	0.05293	59.76	0.02158	59.8	0.03171	59.78	0.04493
60.05	0.03501	60.03	0.05261	59.92	0.02197	59.95	0.03164	59.94	0.04547
60.2	0.03505	60.19	0.05216	60.08	0.0218	60.09	0.0321	60.09	0.04531
60.34	0.03494	60.33	0.05218	60.23	0.02176	60.25	0.03225	60.25	0.04541
60.5	0.03436	60.48	0.05242	60.39	0.0217	60.41	0.03235	60.41	0.04522
60.66	0.03478	60.64	0.05282	60.53	0.02189	60.56	0.03249	60.55	0.04527
60.81	0.03399	60.8	0.05272	60.69	0.02178	60.72	0.03235	60.7	0.04485
60.97	0.03413	60.95	0.05284	60.84	0.02155	60.87	0.0321	60.86	0.04508
61.11	0.03446	61.09	0.05307	61	0.02151	61.01	0.03212	61.02	0.04501
61.27	0.03416	61.25	0.05284	61.16	0.02164	61.17	0.032	61.17	0.04493
61.42	0.03401	61.41	0.05276	61.3	0.02186	61.33	0.03221	61.31	0.04485
61.58	0.03382	61.56	0.05278	61.45	0.02182	61.48	0.03243	61.47	0.04491
61.73	0.03312	61.72	0.05278	61.61	0.02155	61.64	0.03281	61.62	0.04487
61.87	0.03328	61.86	0.0527	61.76	0.02174	61.78	0.0321	61.78	0.04468
62.03	0.03283	62.02	0.05278	61.92	0.02133	61.94	0.03179	61.94	0.04448
62.19	0.03258	62.17	0.05274	62.08	0.02164	62.09	0.03179	62.09	0.04425
62.34	0.03314	62.33	0.05282	62.22	0.0222	62.25	0.03192	62.24	0.04439
62.5	0.03316	62.48	0.0529	62.37	0.02239	62.41	0.0319	62.39	0.04443
62.64	0.03305	62.62	0.05278	62.53	0.0233	62.55	0.03183	62.55	0.04408
62.8	0.03361	62.78	0.05247	62.69	0.02456	62.7	0.03225	62.7	0.04394
62.95	0.03355	62.94	0.0528	62.84	0.02377	62.86	0.03214	62.86	0.04458
63.11	0.03355	63.09	0.05272	63	0.02363	63.01	0.03293	63	0.04423
63.27	0.03345	63.25	0.0527	63.14	0.02222	63.17	0.03318	63.16	0.04379
63.41	0.03372	63.39	0.05274	63.3	0.0213	63.33	0.03354	63.31	0.04404
63.56	0.03332	63.55	0.05232	63.45	0.02184	63.47	0.03326	63.47	0.04361
63.72	0.03316	63.7	0.05255	63.61	0.02209	63.62	0.03308	63.62	0.04391
63.87	0.0322	63.86	0.05234	63.76	0.02174	63.78	0.03318	63.77	0.04369
64.03	0.03241	64.02	0.05253	63.91	0.02186	63.94	0.03314	63.92	0.04377
64.19	0.03243	64.16	0.05236	64.06	0.02195	64.09	0.03264	64.08	0.04385
64.33	0.03305	64.31	0.05272	64.22	0.02238	64.23	0.03245	64.24	0.04383
64.48	0.03322	64.47	0.05276	64.37	0.02222	64.39	0.03268	64.39	0.04437
64.64	0.03287	64.62	0.05297	64.53	0.02238	64.55	0.03314	64.55	0.04398
64.8	0.03295	64.78	0.05278	64.67	0.02218	64.7	0.03368	64.69	0.04414
64.95	0.03318	64.94	0.05282	64.83	0.02236	64.86	0.03335	64.84	0.0436
65.09	0.0332	65.08	0.05242	64.98	0.02269	65	0.03262	65	0.04381
65.25	0.03293	65.23	0.05232	65.14	0.02253	65.16	0.03271	65.16	0.04396
65.41	0.03289	65.39	0.05238	65.3	0.02257	65.31	0.03229	65.31	0.04423
65.56	0.03301	65.55	0.05265	65.45	0.0228	65.47	0.03206	65.47	0.04443
65.72	0.03303	65.7	0.05299	65.59	0.02261	65.62	0.0325	65.61	0.04441
65.87	0.03262	65.86	0.05261	65.75	0.02278	65.76	0.03293	65.77	0.04379
66.02	0.0327	66	0.05266	65.91	0.02278	65.92	0.03271	65.92	0.04361
66.17	0.03305	66.16	0.05266	66.06	0.0228	66.08	0.03214	66.08	0.04346
66.33	0.03324	66.31	0.05257	66.22	0.02251	66.23	0.03227	66.24	0.04371
66.48	0.03312	66.47	0.05259	66.36	0.02282	66.39	0.03252	66.37	0.04385
66.62	0.03332	66.62	0.0527	66.51	0.02299	66.55	0.03219	66.53	0.04391
66.78	0.0331	66.77	0.05261	66.67	0.02251	66.69	0.03208	66.69	0.0435
66.94	0.03276	66.92	0.05247	66.83	0.02243	66.84	0.03264	66.84	0.04377
67.09	0.03241	67.08	0.05257	66.98	0.02278	67	0.03287	67	0.04406
67.25	0.03278	67.23	0.05305	67.12	0.02294	67.16	0.03328	67.14	0.04421
67.41	0.03278	67.39	0.05286	67.28	0.02305	67.31	0.03328	67.3	0.04396
67.55	0.03312	67.53	0.05286	67.44	0.02272	67.45	0.0336	67.45	0.04352
67.7	0.03297	67.69	0.05278	67.59	0.02263	67.61	0.03395	67.61	0.04352
67.86	0.03285	67.84	0.05278	67.75	0.02309	67.76	0.0337	67.77	0.04352
68.02	0.03272	68	0.05259	67.89	0.02386	67.92	0.03345	67.92	0.0435
68.17	0.03252	68.16	0.05255	68.05	0.02378	68.08	0.03349	68.06	0.04381
68.33	0.03268	68.31	0.05218	68.2	0.02322	68.22	0.03316	68.22	0.04377
68.47	0.03262	68.45	0.05224	68.36	0.02338	68.37	0.03273	68.37	0.04373
68.62	0.03274	68.61	0.05212	68.51	0.02361	68.53	0.03271	68.53	0.04429
68.78	0.03285	68.77	0.05226	68.66	0.02324	68.69	0.03254	68.69	0.04423
68.94	0.03272	68.92	0.05224	68.81	0.02315	68.84	0.03291	68.83	0.04423
69.09	0.03249	69.08	0.0522	68.97	0.02259	69	0.03218	68.99	0.04427
69.23	0.0327	69.22	0.05274	69.12	0.02263	69.16	0.03202	69.14	0.04433
69.39	0.03282	69.37	0.05249	69.28	0.02288	69.31	0.0326	69.3	0.04408
69.55	0.03268	69.53	0.05247	69.44	0.02265	69.45	0.03297	69.45	0.04433
69.7	0.03256	69.69	0.0521	69.58	0.02238	69.61	0.03223	69.59	0.0442
69.86	0.03239	69.84	0.05228	69.73	0.02203	69.76	0.03216	69.75	0.04391
70	0.0325	69.98	0.05216	69.89	0.02239	69.92	0.03216	69.91	0.04393
70.16	0.03222	70.14	0.05216	70.05	0.02257	70.08	0.03254	70.06	0.04398
70.31	0.03222	70.3	0.0523	70.2	0.02253	70.22	0.03241	70.22	0.04375
70.47	0.03204	70.45	0.0524	70.34	0.02222	70.37	0.03233	70.37	0.04348
70.62	0.03231	70.61	0.05236	70.5	0.02214	70.53	0.03302	70.52	0.04363
70.77	0.03216	70.75	0.05259	70.66	0.02209	70.69	0.03304	70.67	0.04367
70.92	0.0321	70.91	0.05272	70.81	0.02269	70.84	0.033	70.83	0.04394
71.08	0.03237	71.06	0.05259	70.97	0.02243	71	0.03277	70.99	0.04306
71.23	0.03222	71.22	0.05266	71.12	0.0222	71.14	0.03218	71.14	0.04329
71.39	0.03237	71.37	0.05228	71.26	0.02199	71.3	0.03256	71.28	0.0434
71.53	0.03258	71.52	0.05228	71.42	0.02253	71.45	0.03256	71.44	0.0436
71.69	0.03256	71.67	0.05274	71.58	0.02282	71.61	0.03312	71.59	0.04348
71.84	0.03231	71.83	0.05286	71.73	0.02232	71.76	0.03347	71.75	0.04398
72	0.03256	71.98	0.05274	71.89	0.02224	71.91	0.03389	71.91	0.04391
72.16	0.03258	72.14	0.05307	72.03	0.02232	72.06	0.03326	72.05	0.04412
72.31	0.03229	72.28	0.05319	72.19	0.02236	72.22	0.03279	72.2	0.04402
72.45	0.03256	72.44	0.05313	72.34	0.02189	72.37	0.03285	72.36	0.04383
72.61	0.03227	72.59	0.0527	72.5	0.02155	72.53	0.03295	72.52	0.04402
72.77	0.03225	72.75	0.05263	72.66	0.02097	72.67	0.03326	72.67	0.04431
72.92	0.03214	72.91	0.05214	72.8	0.02133	72.83	0.03335	72.81	0.04439
73.08	0.03231	73.06	0.05242	72.95	0.02149	72.98	0.0331	72.97	0.04435
73.22	0.03243	73.2	0.05228	73.11	0.02166	73.14	0.03362	73.12	0.04423
73.37	0.03241	73.36	0.05253	73.26	0.02139	73.3	0.03318	73.28	0.04416
73.53	0.03247	73.52	0.05257	73.42	0.02155	73.45	0.03275	73.44	0.04404
73.69	0.0326	73.67	0.05266	73.58	0.0218	73.59	0.03275	73.59	0.04394
73.84	0.03287	73.83	0.0528	73.72	0.02184	73.75	0.0336	73.74	0.0442
74	0.03285	73.98	0.05303	73.87	0.02168	73.91	0.03387	73.89	0.04393
74.14	0.03256	74.12	0.05266	74.03	0.02132	74.06	0.03337	74.05	0.04394
74.3	0.03241	74.28	0.05247	74.19	0.02108	74.22	0.03281	74.2	0.04391
74.45	0.03214	74.44	0.05245	74.34	0.02137	74.36	0.03289	74.36	0.04356
74.61	0.03231	74.59	0.05226	74.48	0.02155	74.51	0.03283	74.5	0.04393
74.75	0.03241	74.75	0.05245	74.64	0.02145	74.67	0.0337	74.66	0.04421
74.91	0.03237	74.89	0.05268	74.8	0.0211	74.83	0.03308	74.81	0.04396
75.06	0.03239	75.05	0.05299	74.95	0.02093	74.98	0.03318	74.97	0.0436
75.22	0.03262	75.2	0.05282	75.11	0.02139	75.12	0.03314	75.12	0.04354
75.37	0.03268	75.36	0.05305	75.25	0.02141	75.28	0.03277	75.27	0.04354
75.53	0.03264	75.52	0.05276	75.41	0.02107	75.44	0.03241	75.42	0.04338
75.67	0.03285	75.66	0.05299	75.56	0.02132	75.59	0.03235	75.58	0.04327
75.83	0.03282	75.81	0.05353	75.72	0.02172	75.75	0.03254	75.74	0.04348
75.98	0.03249	75.97	0.05373	75.87	0.02164	75.89	0.03268	75.89	0.0434
76.14	0.0325	76.12	0.0538	76.01	0.02112	76.05	0.03268	76.05	0.043
76.3	0.03239	76.28	0.05384	76.17	0.02089	76.2	0.03266	76.19	0.04308
76.45	0.03243	76.44	0.0533	76.33	0.02087	76.36	0.03273	76.34	0.04329
76.59	0.03258	76.58	0.05321	76.48	0.02093	76.51	0.03291	76.5	0.04354
76.75	0.0328	76.73	0.05334	76.64	0.0213	76.67	0.03333	76.66	0.0429
76.91	0.03268	76.89	0.05311	76.78	0.0211	76.81	0.0336	76.81	0.04265
77.06	0.03225	77.05	0.05309	76.94	0.02085	76.97	0.03302	76.95	0.04263
77.22	0.03268	77.2	0.05293	77.09	0.02108	77.12	0.03333	77.11	0.04308
77.36	0.03285	77.34	0.05311	77.25	0.02153	77.28	0.03345	77.27	0.04304
77.52	0.0332	77.5	0.05317	77.41	0.02166	77.44	0.03335	77.42	0.04308
77.67	0.03283	77.66	0.05323	77.56	0.02162	77.58	0.03339	77.58	0.04292
77.83	0.03316	77.81	0.0533	77.7	0.02128	77.73	0.03275	77.72	0.04279
77.98	0.03322	77.97	0.05295	77.86	0.02137	77.89	0.03279	77.87	0.04246
78.12	0.03291	78.11	0.05303	78.01	0.02132	78.05	0.03312	78.03	0.04302
78.28	0.03241	78.27	0.05319	78.17	0.02097	78.2	0.033	78.19	0.04296
78.44	0.03283	78.42	0.05317	78.33	0.02027	78.34	0.03271	78.34	0.04248
78.59	0.03299	78.58	0.05321	78.47	0.02022	78.5	0.03316	78.5	0.04257
78.75	0.03285	78.73	0.05315	78.62	0.0205	78.66	0.03279	78.64	0.04261
78.91	0.03268	78.87	0.05326	78.78	0.02022	78.81	0.03268	78.8	0.0428
79.05	0.03312	79.03	0.05319	78.94	0.02041	78.97	0.03239	78.95	0.04304
79.2	0.03341	79.19	0.05321	79.09	0.02039	79.12	0.03266	79.11	0.04333
79.36	0.03339	79.34	0.05319	79.25	0.02039	79.26	0.03243	79.27	0.04335
79.52	0.03361	79.5	0.05338	79.39	0.02066	79.42	0.03229	79.41	0.04317
79.67	0.0338	79.64	0.05369	79.55	0.02075	79.58	0.03221	79.56	0.04288
79.83	0.03387	79.8	0.05347	79.7	0.0205	79.73	0.03212	79.72	0.04277
79.97	0.03363	79.95	0.05338	79.86	0.02025	79.89	0.03252	79.87	0.04319
80.12	0.03347	80.11	0.05344	80.01	0.02022	80.03	0.03249	80.03	0.04312
80.28	0.03264	80.27	0.05374	80.16	0.02047	80.19	0.03243	80.17	0.04325
80.44	0.03216	80.42	0.05363	80.31	0.0207	80.34	0.03281	80.33	0.04265
80.59	0.03204	80.56	0.05378	80.47	0.02045	80.5	0.032	80.49	0.0424
80.75	0.03225	80.72	0.05365	80.62	0.02025	80.66	0.03192	80.64	0.04259
80.89	0.03247	80.87	0.05384	80.78	0.0205	80.81	0.03187	80.8	0.04282
81.05	0.03227	81.03	0.054	80.94	0.02085	80.95	0.03243	80.95	0.04279
81.2	0.0328	81.19	0.05406	81.08	0.02058	81.11	0.03239	81.09	0.0428
81.36	0.03278	81.34	0.05409	81.23	0.0206	81.26	0.03225	81.25	0.04271
81.52	0.03216	81.48	0.05421	81.39	0.02079	81.42	0.03252	81.41	0.04298
81.66	0.03282	81.64	0.05398	81.55	0.02064	81.58	0.03221	81.56	0.04298
81.81	0.03297	81.8	0.05382	81.7	0.02112	81.72	0.03233	81.72	0.04313
81.97	0.03291	81.95	0.0538	81.86	0.02108	81.87	0.03268	81.87	0.04337
82.12	0.03258	82.11	0.05411	82	0.02107	82.03	0.03289	82.02	0.04313
82.28	0.03305	82.27	0.05411	82.16	0.02085	82.19	0.03318	82.17	0.04312
82.44	0.03368	82.41	0.05392	82.31	0.02083	82.34	0.0333	82.33	0.04315
82.58	0.03355	82.56	0.05413	82.47	0.02064	82.5	0.0332	82.49	0.04292
82.73	0.03287	82.72	0.05398	82.62	0.02024	82.64	0.03297	82.64	0.04312
82.89	0.03208	82.87	0.05392	82.76	0.01993	82.8	0.03285	82.8	0.04335
83.05	0.0328	83.03	0.05406	82.92	0.0201	82.95	0.03258	82.94	0.04321
83.2	0.03322	83.19	0.05409	83.08	0.02031	83.11	0.03299	83.09	0.04308
83.36	0.03318	83.33	0.05394	83.23	0.02039	83.26	0.03322	83.25	0.0435
83.5	0.0331	83.48	0.05419	83.39	0.02018	83.42	0.03383	83.41	0.04331
83.66	0.03351	83.64	0.05428	83.55	0.01993	83.56	0.03405	83.56	0.04315
83.81	0.03363	83.8	0.0544	83.7	0.02037	83.72	0.03381	83.72	0.04327
83.97	0.03339	83.95	0.05409	83.84	0.02039	83.87	0.03308	83.86	0.04331
84.12	0.03314	84.11	0.05363	84	0.02018	84.03	0.0331	84.02	0.0434
84.28	0.03264	84.25	0.05361	84.16	0.01993	84.19	0.0335	84.17	0.04308
84.42	0.03305	84.41	0.05357	84.31	0.01975	84.34	0.03343	84.33	0.0429
84.58	0.0327	84.56	0.05367	84.47	0.02024	84.48	0.03385	84.49	0.04304
84.73	0.03247	84.72	0.05363	84.62	0.02041	84.64	0.03354	84.64	0.04344
84.89	0.03241	84.87	0.0533	84.76	0.02039	84.8	0.03339	84.78	0.04352
85.05	0.0327	85.03	0.05349	84.92	0.02027	84.95	0.03308	84.94	0.04327
85.2	0.03256	85.17	0.05361	85.08	0.02	85.11	0.03285	85.09	0.0434
85.34	0.03297	85.33	0.05355	85.23	0.02016	85.26	0.03266	85.25	0.04344
85.5	0.03335	85.48	0.05363	85.39	0.0205	85.41	0.03221	85.41	0.04367
85.66	0.03326	85.64	0.05367	85.53	0.02014	85.56	0.03231	85.56	0.04352
85.81	0.03318	85.8	0.05346	85.69	0.01991	85.72	0.03247	85.7	0.04279
85.97	0.03341	85.95	0.05309	85.84	0.0202	85.87	0.03254	85.86	0.0423
86.12	0.03314	86.09	0.05323	86	0.02008	86.03	0.03295	86.02	0.0423
86.27	0.03312	86.25	0.05301	86.16	0.02052	86.19	0.0326	86.17	0.0423
86.42	0.03308	86.41	0.05303	86.31	0.02068	86.33	0.03287	86.33	0.04242
86.58	0.03278	86.56	0.05288	86.45	0.01994	86.48	0.03266	86.49	0.04265
86.73	0.03289	86.72	0.05309	86.61	0.0202	86.64	0.03268	86.62	0.0424
86.89	0.03272	86.87	0.05334	86.76	0.0206	86.8	0.03247	86.78	0.04256
87.05	0.0327	87.02	0.05367	86.92	0.02045	86.95	0.03299	86.94	0.04259
87.19	0.0331	87.17	0.05328	87.08	0.02041	87.11	0.03247	87.09	0.04269
87.34	0.03305	87.33	0.05332	87.23	0.0205	87.25	0.03221	87.25	0.04275
87.5	0.03312	87.48	0.05351	87.37	0.02074	87.41	0.03291	87.41	0.04282
87.66	0.03293	87.64	0.0533	87.53	0.0206	87.56	0.03314	87.55	0.04284
87.81	0.03295	87.78	0.05301	87.69	0.02027	87.72	0.033	87.7	0.043
87.97	0.03289	87.94	0.05319	87.84	0.02025	87.87	0.03285	87.86	0.04292
88.11	0.03297	88.09	0.05361	88	0.01998	88.03	0.03277	88.02	0.0428
88.27	0.03301	88.25	0.0539	88.16	0.02002	88.17	0.03233	88.17	0.04313
88.42	0.03291	88.41	0.0538	88.3	0.01989	88.33	0.03231	88.33	0.04313
88.58	0.03266	88.56	0.05334	88.45	0.02	88.48	0.03223	88.47	0.04319
88.73	0.03231	88.7	0.05353	88.61	0.02002	88.64	0.03312	88.62	0.0434
88.89	0.03258	88.86	0.05351	88.76	0.02004	88.8	0.03364	88.78	0.04337
89.03	0.03254	89.02	0.05323	88.92	0.02035	88.95	0.03297	88.94	0.0435
89.19	0.03254	89.17	0.05373	89.08	0.02047	89.09	0.03262	89.09	0.04389
89.34	0.03237	89.33	0.05384	89.22	0.02045	89.25	0.03268	89.25	0.04423
89.5	0.03252	89.48	0.0538	89.37	0.02047	89.41	0.03337	89.39	0.04377
89.66	0.0326	89.62	0.05371	89.53	0.02008	89.56	0.03293	89.55	0.04356
89.81	0.03264	89.78	0.05367	89.69	0.02054	89.72	0.03281	89.7	0.04369
89.95	0.0328	89.94	0.05359	89.84	0.02095	89.87	0.03245	89.86	0.04354
90.11	0.03256	90.09	0.054	90	0.02064	90.01	0.0331	90.02	0.04337
90.27	0.03274	90.25	0.05396	90.14	0.02039	90.17	0.03239	90.17	0.04344
90.42	0.03208	90.41	0.05404	90.3	0.02083	90.33	0.03192	90.31	0.04342
90.58	0.03264	90.56	0.05398	90.45	0.02072	90.48	0.03223	90.47	0.04346
90.73	0.03254	90.7	0.05421	90.61	0.0206	90.64	0.03293	90.62	0.04358
90.87	0.03264	90.86	0.05417	90.76	0.0206	90.8	0.03308	90.78	0.04323
91.03	0.03268	91.02	0.05432	90.92	0.02029	90.94	0.03277	90.94	0.04356
91.19	0.03276	91.17	0.05438	91.06	0.02072	91.09	0.03239	91.09	0.04323
91.34	0.03272	91.33	0.05436	91.22	0.02101	91.25	0.033	91.24	0.04335
91.5	0.03289	91.48	0.05434	91.37	0.02101	91.41	0.03299	91.39	0.04352
91.66	0.03322	91.62	0.05446	91.53	0.02083	91.56	0.03322	91.55	0.04361
91.8	0.03308	91.78	0.0544	91.69	0.02089	91.72	0.03405	91.7	0.0435
91.95	0.03318	91.94	0.05428	91.84	0.02105	91.86	0.03447	91.86	0.04342
92.11	0.03285	92.09	0.05402	91.98	0.02137	92.01	0.03407	92.02	0.04356
92.27	0.03287	92.25	0.05415	92.14	0.02105	92.17	0.033	92.16	0.04398
92.42	0.03287	92.41	0.054	92.3	0.02087	92.33	0.03328	92.31	0.04406
92.58	0.03247	92.55	0.05357	92.45	0.02114	92.48	0.03376	92.47	0.04383
92.72	0.0327	92.7	0.05342	92.61	0.02128	92.62	0.03383	92.62	0.04294
92.87	0.03274	92.86	0.05376	92.76	0.02132	92.78	0.03389	92.78	0.04313
93.03	0.03274	93.02	0.05388	92.91	0.02089	92.94	0.03412	92.92	0.04319
93.19	0.0326	93.17	0.05376	93.06	0.02101	93.09	0.03418	93.08	0.04327
93.34	0.03229	93.33	0.05388	93.22	0.02126	93.25	0.03378	93.24	0.04306
93.5	0.0326	93.47	0.0539	93.37	0.02143	93.41	0.03385	93.39	0.04329
93.64	0.03216	93.62	0.05378	93.53	0.02143	93.55	0.03387	93.55	0.04319
93.8	0.03227	93.78	0.05382	93.67	0.02135	93.7	0.03378	93.7	0.04315
93.95	0.03245	93.94	0.05355	93.83	0.02145	93.86	0.03376	93.84	0.04259
94.11	0.0325	94.09	0.05332	93.98	0.02156	94.01	0.03352	94	0.04288
94.27	0.0326	94.25	0.05326	94.14	0.02176	94.17	0.03366	94.16	0.04257
94.41	0.03229	94.39	0.05326	94.3	0.02143	94.33	0.03349	94.31	0.04257
94.56	0.03233	94.55	0.05311	94.45	0.02126	94.47	0.03279	94.47	0.04126
94.72	0.03247	94.7	0.05328	94.59	0.02099	94.62	0.03308	94.62	0.04113
94.87	0.03216	94.86	0.05336	94.75	0.02132	94.78	0.03374	94.77	0.04148
95.03	0.03208	95.02	0.05388	94.91	0.02139	94.94	0.03328	94.92	0.04201
95.19	0.03241	95.16	0.05378	95.06	0.02153	95.09	0.03356	95.08	0.04221
95.33	0.03289	95.31	0.05411	95.22	0.02133	95.25	0.03403	95.24	0.04252
95.48	0.03249	95.47	0.05419	95.37	0.02166	95.39	0.03387	95.39	0.04265
95.64	0.03264	95.62	0.05386	95.51	0.02178	95.55	0.03295	95.55	0.0425
95.8	0.03264	95.78	0.05373	95.67	0.02162	95.7	0.03269	95.7	0.04292
95.95	0.03293	95.94	0.05411	95.83	0.0212	95.86	0.03281	95.84	0.04242
96.11	0.0322	96.08	0.05374	95.98	0.02122	96.01	0.03287	96	0.04217
96.25	0.03199	96.23	0.05411	96.14	0.02135	96.17	0.03258	96.16	0.04192
96.41	0.03179	96.39	0.05392	96.3	0.02166	96.31	0.03264	96.31	0.04215
96.56	0.03121	96.55	0.05396	96.45	0.02178	96.47	0.03295	96.47	0.04196
96.72	0.03141	96.7	0.05407	96.59	0.02151	96.62	0.03331	96.62	0.04215
96.87	0.03164	96.86	0.05436	96.75	0.02118	96.78	0.0333	96.77	0.04173
97.03	0.03173	97	0.05398	96.91	0.0216	96.94	0.03285	96.92	0.04101
97.17	0.03197	97.16	0.05371	97.06	0.02174	97.09	0.03316	97.08	0.04134
97.33	0.03137	97.31	0.05376	97.22	0.02147	97.23	0.03333	97.24	0.04161
97.48	0.03104	97.47	0.05413	97.37	0.02114	97.39	0.03312	97.39	0.04159
97.64	0.03133	97.62	0.05411	97.51	0.02091	97.55	0.03295	97.55	0.04144
97.8	0.03208	97.78	0.05421	97.67	0.02116	97.7	0.03249	97.69	0.04173
97.95	0.03201	97.94	0.05434	97.83	0.0211	97.86	0.0332	97.84	0.04107
98.09	0.03218	98.08	0.05461	97.98	0.02114	98.01	0.03316	98	0.04146
98.25	0.03142	98.23	0.05448	98.14	0.02141	98.16	0.03254	98.16	0.04124
98.41	0.03135	98.39	0.05473	98.28	0.02141	98.31	0.03202	98.31	0.04113
98.56	0.03129	98.55	0.05479	98.44	0.02149	98.47	0.03212	98.47	0.04151
98.72	0.03158	98.7	0.05427	98.59	0.02172	98.62	0.03214	98.61	0.04196
98.87	0.03144	98.86	0.05434	98.75	0.02139	98.78	0.03245	98.77	0.04165
99.02	0.03168	99	0.05442	98.91	0.02105	98.94	0.0319	98.92	0.04167
99.17	0.03177	99.16	0.05481	99.06	0.02153	99.08	0.03225	99.08	0.04167
99.33	0.03183	99.31	0.05481	99.2	0.02143	99.23	0.03243	99.49	0.04111
99.48	0.0316	99.47	0.05483	99.36	0.02176	99.39	0.03202	99.64	0.04163
99.64	0.03123	99.62	0.05465	99.51	0.02141	99.55	0.03169	99.78	0.04169
99.8	0.03129	99.77	0.05469	99.67	0.02149	99.7	0.03133	99.94	0.04167
99.94	0.0316	99.92	0.05485	99.83	0.02145	99.86	0.03179	100.09	0.0414
100.09	0.03191	100.08	0.05498	99.98	0.02176	100	0.03188	100.25	0.04116
100.25	0.03185	100.23	0.05469	100.12	0.02145	100.16	0.03204	100.41	0.04095
100.41	0.0311	100.39	0.05409	100.28	0.02116	100.31	0.03206	100.56	0.04105
100.56	0.03112	100.55	0.0538	100.44	0.02103	100.47	0.03245	100.72	0.0408
100.72	0.0311	100.69	0.05404	100.59	0.02122	100.62	0.03173	100.86	0.04115
100.86	0.0311	100.84	0.05411	100.75	0.0211	100.78	0.03162	101.02	0.04103
101.02	0.03135	101	0.05406	100.91	0.0212	100.92	0.03335	101.17	0.04109
101.17	0.03162	101.16	0.0545	101.05	0.02097	101.08	0.03356	101.33	0.04157
101.33	0.03189	101.31	0.05455	101.2	0.02091	101.23	0.03302	101.49	0.04138
101.48	0.03144	101.47	0.05481	101.36	0.02112	101.39	0.03202	101.62	0.04093
101.64	0.0315	101.61	0.05475	101.51	0.02114	101.55	0.03206	101.78	0.04095
101.78	0.03195	101.77	0.05434	101.67	0.02024	101.7	0.03171	101.94	0.04093
101.94	0.03197	101.92	0.05442	101.83	0.02052	101.84	0.03146	102.09	0.04118
102.09	0.03183	102.08	0.05457	101.97	0.02112	102	0.03204	102.25	0.04148
102.25	0.03229	102.23	0.0544	102.12	0.02151	102.16	0.03221	102.41	0.04126
102.41	0.03212	102.39	0.05454	102.28	0.02124	102.31	0.03241	102.55	0.04105
102.56	0.03252	102.53	0.05455	102.44	0.02101	102.47	0.03275	102.7	0.04086
102.7	0.03208	102.69	0.05428	102.59	0.0207	102.62	0.03275	102.86	0.04082
102.86	0.03168	102.84	0.05425	102.75	0.02103	102.76	0.03254	103.02	0.04082
103.02	0.03164	103	0.05459	102.89	0.02101	102.92	0.0333	103.17	0.04111
103.17	0.03118	103.16	0.0549	103.05	0.02074	103.08	0.03287	103.33	0.04109
103.33	0.03131	103.31	0.05498	103.2	0.02025	103.23	0.03306	103.47	0.04097
103.48	0.03135	103.45	0.05487	103.36	0.0201	103.39	0.03316	103.62	0.04101
103.62	0.03142	103.61	0.05461	103.51	0.02052	103.55	0.03337	103.78	0.04109
103.78	0.03104	103.77	0.05467	103.67	0.02075	103.69	0.03372	103.94	0.0407
103.94	0.03123	103.92	0.0544	103.81	0.02039	103.84	0.0337	104.09	0.04074
104.09	0.03061	104.08	0.05421	103.97	0.0202	104	0.03221	104.25	0.04068
104.25	0.03118	104.23	0.05404	104.12	0.02012	104.16	0.03285	104.39	0.04074
104.41	0.03114	104.37	0.05413	104.28	0.02033	104.31	0.0332	104.55	0.04049
104.55	0.03069	104.53	0.05415	104.44	0.02027	104.47	0.0337	104.7	0.0407
104.7	0.03061	104.69	0.05425	104.59	0.02056	104.61	0.03424	105.11	0.0408
104.86	0.0309	104.84	0.05438	104.73	0.02012	104.76	0.03381	105.27	0.04072
105.02	0.03114	105	0.05457	104.89	0.02012	104.92	0.0338	105.41	0.04072
105.17	0.03083	105.16	0.05465	105.05	0.02045	105.08	0.033	105.56	0.04084
105.33	0.02998	105.3	0.05452	105.2	0.0205	105.23	0.0326	105.72	0.04067
105.47	0.02965	105.45	0.05452	105.36	0.02035	105.37	0.03229	105.87	0.04055
105.62	0.03009	105.61	0.05454	105.51	0.02004	105.53	0.03152	106.03	0.04082
105.78	0.03042	105.77	0.05448	105.66	0.01973	105.69	0.03167	106.19	0.04092
105.94	0.03071	105.92	0.05432	105.81	0.02002	105.84	0.03138	106.34	0.04074
106.09	0.03112	106.08	0.05425	105.97	0.02027	106	0.03088	106.49	0.04097
106.25	0.03139	106.22	0.05388	106.12	0.02029	106.16	0.03169	106.64	0.04074
106.39	0.03135	106.37	0.05427	106.28	0.02004	106.3	0.03194	106.8	0.04068
106.55	0.03123	106.53	0.05421	106.42	0.02025	106.45	0.03187	106.95	0.04068
106.7	0.03069	106.69	0.05438	106.58	0.02085	106.61	0.03144	107.11	0.04076
106.86	0.03081	106.84	0.05428	106.73	0.02083	106.76	0.03212	107.25	0.04065
107.02	0.0311	107	0.05373	106.89	0.02075	106.92	0.03235	107.41	0.04076
107.16	0.03146	107.14	0.05378	107.05	0.02095	107.08	0.03192	107.56	0.04067
107.31	0.03121	107.3	0.05421	107.2	0.02126	107.22	0.03196	107.72	0.04022
107.47	0.0316	107.45	0.05419	107.34	0.0211	107.37	0.03158	107.87	0.04026
107.62	0.03116	107.61	0.05421	107.5	0.02108	107.53	0.03104	108.03	0.03993
107.78	0.03158	107.77	0.05404	107.66	0.02099	107.69	0.03164	108.17	0.04026
107.94	0.03121	107.91	0.05404	107.81	0.02097	107.84	0.03113	108.33	0.03999
108.08	0.03139	108.06	0.0543	107.97	0.02107	108	0.031	108.49	0.04055
108.23	0.03102	108.22	0.05454	108.12	0.02132	108.14	0.03088	108.64	0.04059
108.39	0.03054	108.37	0.05467	108.26	0.02166	108.3	0.0305	108.8	0.04022
108.55	0.03058	108.53	0.05477	108.42	0.02137	108.45	0.03127	108.95	0.03978
108.7	0.03029	108.69	0.05488	108.58	0.02143	108.61	0.0319	109.11	0.04001
108.86	0.03058	108.83	0.05463	108.73	0.02149	108.76	0.03212	109.25	0.03987
109	0.03077	108.98	0.05459	108.89	0.02166	108.92	0.03115	109.41	0.03982
109.16	0.03177	109.14	0.0545	109.05	0.02139	109.06	0.03123	109.56	0.03995
109.31	0.03256	109.3	0.05465	109.2	0.02116	109.22	0.03111	109.72	0.03984
109.47	0.03227	109.45	0.05465	109.34	0.02103	109.37	0.03142	109.87	0.0398
109.62	0.03222	109.61	0.05461	109.5	0.02137	109.53	0.03192	110.03	0.03964
109.78	0.0312	109.75	0.05436	109.66	0.02139	109.69	0.03144	110.17	0.03976
109.92	0.03077	109.91	0.05465	109.81	0.02087	109.84	0.03136	110.33	0.04005
110.08	0.03102	110.06	0.05463	109.97	0.02074	109.98	0.03204	110.49	0.04026
110.23	0.03063	110.22	0.05444	110.12	0.02099	110.14	0.03208	110.64	0.04039
110.39	0.03033	110.37	0.05452	110.26	0.02141	110.3	0.03059	110.8	0.0403
110.55	0.03081	110.53	0.05421	110.42	0.02107	110.45	0.0303	111.16	0.04047
110.7	0.03044	110.69	0.05396	110.58	0.02107	110.61	0.0305	111.31	0.04051
110.84	0.03094	110.83	0.05417	110.73	0.02074	110.76	0.03173	111.45	0.04012
111	0.03137	110.98	0.05432	110.89	0.02074	110.91	0.03164	111.61	0.0398
111.16	0.03133	111.14	0.05455	111.03	0.02101	111.06	0.03088	111.77	0.04009
111.31	0.03085	111.3	0.05415	111.19	0.02081	111.22	0.03007	111.92	0.04016
111.47	0.03033	111.45	0.05419	111.34	0.02097	111.37	0.03038	112.08	0.04014
111.62	0.03088	111.61	0.05454	111.5	0.02085	111.53	0.03098	112.24	0.04007
111.78	0.031	111.77	0.05434	111.66	0.02095	111.69	0.03098	112.39	0.04007
111.94	0.03056	111.92	0.05452	111.81	0.0213	111.83	0.0319	112.53	0.03987
112.08	0.0309	112.08	0.05452	111.95	0.02118	111.98	0.03123	112.69	0.04014
112.23	0.03108	112.22	0.05457	112.11	0.0207	112.14	0.0305	112.84	0.04018
112.39	0.03129	112.37	0.05461	112.26	0.02072	112.3	0.03015	113	0.04037
112.55	0.03121	112.53	0.05467	112.42	0.02091	112.45	0.03026	113.16	0.04037
112.7	0.03077	112.69	0.05463	112.58	0.02164	112.61	0.03107	113.31	0.04045
112.86	0.03054	112.84	0.05488	112.73	0.0213	112.76	0.03117	113.47	0.04039
113.02	0.03025	113	0.05479	112.87	0.02097	112.92	0.03175	113.62	0.04026
113.17	0.03058	113.16	0.05459	113.03	0.02101	113.06	0.03225	113.77	0.04043
113.33	0.0309	113.31	0.0545	113.19	0.02085	113.22	0.03206	113.92	0.04043
113.47	0.0306	113.47	0.05436	113.34	0.02074	113.37	0.03069	114.08	0.0407
113.62	0.03046	113.61	0.05452	113.5	0.02062	113.53	0.03026	114.24	0.04063
113.78	0.03067	113.77	0.05417	113.66	0.02064	113.69	0.03077	114.39	0.04047
113.94	0.03038	113.92	0.05361	113.81	0.02054	113.84	0.03092	114.55	0.04026
114.09	0.03046	114.08	0.05347	113.97	0.02049	114	0.03121	114.7	0.04041
114.25	0.03038	114.23	0.05336	114.12	0.02105	114.14	0.03067	114.86	0.04014
114.41	0.03073	114.39	0.05346	114.26	0.02097	114.3	0.0305	115.02	0.04057
114.56	0.03067	114.55	0.05371	114.42	0.02068	114.45	0.03024	115.17	0.04059
114.72	0.0305	114.7	0.05388	114.58	0.02058	114.61	0.03055	115.31	0.04037
114.86	0.03085	114.86	0.05425	114.73	0.02081	114.76	0.031	115.47	0.04014
115.02	0.03058	115	0.05442	114.89	0.02087	114.92	0.03032	115.62	0.04011
115.17	0.03085	115.16	0.05446	115.05	0.02089	115.08	0.03017	115.78	0.03987
115.33	0.03106	115.31	0.05438	115.2	0.02054	115.23	0.03075	115.94	0.03956
115.48	0.03077	115.47	0.05421	115.36	0.02025	115.39	0.03065	116.09	0.03972
115.64	0.03052	115.62	0.05421	115.5	0.02074	115.55	0.03054	116.25	0.0398
115.8	0.03104	115.78	0.05413	115.66	0.02091	115.69	0.03055	116.39	0.03984
115.95	0.031	115.95	0.05374	115.81	0.02045	115.84	0.02994	116.55	0.03931
116.09	0.03079	116.11	0.05425	115.97	0.0202	116	0.03017	116.7	0.03982
116.25	0.03166	116.27	0.0545	116.12	0.02043	116.16	0.03028	116.86	0.03989
116.41	0.03092	116.42	0.05407	116.28	0.02064	116.31	0.03059	117.02	0.04014
116.56	0.03169	116.56	0.05428	116.44	0.02054	116.47	0.03057	117.17	0.03993
116.72	0.03144	116.72	0.054	116.59	0.02045	116.62	0.03044	117.33	0.03966
116.87	0.0311	116.87	0.05409	116.75	0.01981	116.78	0.03065	117.49	0.03906
117.03	0.03102	117.03	0.05398	116.89	0.01991	116.92	0.03167	117.64	0.03933
117.19	0.03065	117.19	0.05386	117.05	0.02035	117.08	0.03135	117.8	0.0397
117.34	0.03071	117.34	0.05384	117.2	0.02049	117.23	0.03011	117.94	0.0398
117.48	0.03063	117.5	0.05386	117.36	0.02031	117.39	0.02943	118.09	0.03978
117.64	0.03102	117.66	0.05388	117.51	0.02012	117.55	0.0299	118.25	0.04005
117.8	0.03102	117.81	0.05394	117.67	0.01983	117.7	0.03021	118.41	0.04005
117.95	0.03116	117.95	0.05419	117.83	0.02024	117.86	0.02982	118.56	0.04001
118.11	0.03137	118.11	0.05425	117.98	0.02024	118.01	0.02961	118.72	0.04028
118.27	0.03116	118.27	0.05394	118.14	0.02025	118.17	0.03	118.87	0.0403
118.42	0.03146	118.42	0.05365	118.28	0.01975	118.31	0.02978	119.02	0.04016
118.58	0.03148	118.58	0.05367	118.44	0.0202	118.47	0.02909	119.17	0.04012
118.72	0.03183	118.73	0.05373	118.59	0.02072	118.62	0.02922	119.33	0.0403
118.87	0.03137	118.89	0.05367	118.75	0.02031	118.78	0.02945	119.49	0.04035
119.03	0.03173	119.05	0.05357	118.91	0.01994	118.94	0.02949	119.64	0.04061
119.19	0.03214	119.2	0.05363	119.06	0.01971	119.09	0.02984	119.8	0.04032
119.34	0.03224	119.34	0.05328	119.22	0.01975	119.25	0.03011	119.95	0.03964
119.5	0.03185	119.5	0.05373	119.37	0.01998	119.41	0.03017	120.11	0.03984
119.66	0.03191	119.66	0.05407	119.53	0.01994	119.55	0.02951	120.27	0.0402
119.81	0.03239	119.81	0.054	119.67	0.01971	119.7	0.02882	120.42	0.04041
119.97	0.03243	119.97	0.05334	119.83	0.01977	119.86	0.0288	120.56	0.04053
120.11	0.03262	120.12	0.05351	119.98	0.01971	120.01	0.0287	120.72	0.04012
120.27	0.03266	120.28	0.05347	120.14	0.02022	120.17	0.02919	120.87	0.04009
120.42	0.03316	120.44	0.05319	120.3	0.0202	120.33	0.02895	121.03	0.03993
120.58	0.03312	120.59	0.05325	120.45	0.02002	120.48	0.02862	121.19	0.0398
120.73	0.03297	120.73	0.05326	120.61	0.01998	120.64	0.02868	121.34	0.03985
120.89	0.03258	120.89	0.05317	120.76	0.01985	120.8	0.02886	121.5	0.03991
121.05	0.03185	121.05	0.0533	120.92	0.02018	120.94	0.02857	121.64	0.0402
121.2	0.03144	121.2	0.05363	121.06	0.01993	121.09	0.02891	121.8	0.04041
121.36	0.03141	121.36	0.05396	121.22	0.01989	121.25	0.02862	121.95	0.04047
121.52	0.0321	121.52	0.05374	121.37	0.01971	121.41	0.02886	122.11	0.04014
121.67	0.03222	121.67	0.05404	121.53	0.01964	121.56	0.02921	122.27	0.04005
121.83	0.03208	121.83	0.05417	121.69	0.01956	121.72	0.02893	122.42	0.04018
121.97	0.03291	121.98	0.05382	121.84	0.01954	121.87	0.02919	122.58	0.04034
122.12	0.03289	122.12	0.05404	122	0.01915	122.03	0.02919	122.74	0.04039
122.28	0.03295	122.28	0.05423	122.16	0.01913	122.19	0.02922	122.89	0.04024
122.44	0.03183	122.44	0.05394	122.3	0.01937	122.33	0.0298	123.05	0.04032
122.59	0.03187	122.59	0.05373	122.45	0.01985	122.48	0.02986	123.19	0.04041
122.75	0.03208	122.75	0.05367	122.61	0.01991	122.64	0.02973	123.34	0.0407
122.91	0.03216	122.91	0.05384	122.76	0.01971	122.8	0.0293	123.5	0.04097
123.06	0.03204	123.06	0.05382	122.92	0.01919	122.95	0.02905	123.66	0.04082
123.22	0.03249	123.22	0.0538	123.08	0.01929	123.11	0.02943	123.81	0.04045
123.36	0.03175	123.36	0.05378	123.23	0.01954	123.26	0.02957	123.97	0.04055
123.56	0.03175	123.52	0.05398	123.39	0.01939	123.42	0.02926	124.12	0.04014
123.72	0.03235	123.67	0.05396	123.55	0.01935	123.56	0.02949	124.27	0.04043
123.86	0.03199	123.83	0.05411	123.69	0.01943	123.72	0.02974	124.42	0.04055
124.02	0.03231	123.98	0.05376	123.84	0.01964	123.87	0.03	124.58	0.04072
124.17	0.03216	124.14	0.05404	124	0.01946	124.03	0.03007	124.74	0.04024
124.33	0.03201	124.3	0.05425	124.16	0.01964	124.19	0.0299	124.89	0.04059
124.48	0.03218	124.45	0.05421	124.31	0.01917	124.34	0.0293	125.05	0.0407
124.64	0.03278	124.61	0.05417	124.47	0.01917	124.5	0.02891	125.2	0.04097
124.8	0.03276	124.75	0.05438	124.62	0.01952	124.66	0.02953	125.36	0.04078
124.95	0.03233	124.91	0.05417	124.78	0.01935	124.81	0.02934	125.52	0.04101
125.09	0.03237	125.06	0.05386	124.92	0.01904	124.95	0.02973	125.67	0.04053
125.25	0.03247	125.22	0.05386	125.08	0.0191	125.11	0.02988	125.81	0.0408
125.41	0.03282	125.37	0.05346	125.23	0.01913	125.26	0.03044	125.97	0.04082
125.56	0.03229	125.53	0.0538	125.39	0.01971	125.42	0.03034	126.12	0.04076
125.72	0.03239	125.69	0.05407	125.55	0.01975	125.58	0.02919	126.28	0.04078
125.87	0.0321	125.84	0.05396	125.7	0.01933	125.73	0.02957	126.44	0.04088
126.03	0.03218	125.98	0.05376	125.86	0.01964	125.89	0.03023	126.59	0.04105
126.19	0.03233	126.14	0.05386	126.01	0.01941	126.05	0.03004	126.75	0.04093
126.34	0.03274	126.3	0.05353	126.17	0.01919	126.19	0.03057	126.89	0.04078
126.48	0.03308	126.45	0.05346	126.31	0.01923	126.34	0.03005	127.05	0.0408
126.64	0.03378	126.61	0.05323	126.47	0.01911	126.5	0.02998	127.2	0.04068
126.8	0.03366	126.77	0.05299	126.62	0.01904	126.66	0.02998	127.36	0.04037
126.95	0.03409	126.92	0.05295	126.78	0.01871	126.81	0.02994	127.52	0.04037
127.11	0.03337	127.08	0.05313	126.94	0.01869	126.97	0.02942	127.67	0.04047
127.27	0.03376	127.23	0.05317	127.09	0.01894	127.12	0.02951	127.83	0.04076
127.42	0.03299	127.37	0.05315	127.25	0.01887	127.28	0.03015	127.99	0.04057
127.58	0.03262	127.53	0.05315	127.41	0.01875	127.44	0.0305	128.14	0.04047
127.72	0.03368	127.69	0.05338	127.55	0.01877	127.58	0.02955	128.3	0.04037
127.87	0.03337	127.84	0.05336	127.7	0.01917	127.73	0.03057	128.44	0.04034
128.03	0.03335	128	0.05311	127.86	0.01927	127.89	0.03146	128.59	0.04059
128.19	0.03293	128.16	0.05309	128.01	0.01892	128.05	0.0315	128.75	0.04012
128.34	0.0332	128.31	0.05344	128.17	0.01879	128.2	0.03071	128.91	0.04018
128.5	0.03347	128.47	0.05355	128.33	0.01896	128.36	0.03036	129.06	0.03995
128.66	0.03378	128.61	0.05386	128.48	0.01888	128.51	0.03004	129.22	0.04011
128.81	0.03366	128.77	0.05384	128.64	0.01883	128.67	0.02915	129.37	0.04053
128.97	0.03299	128.92	0.05386	128.8	0.019	128.81	0.02963	129.52	0.04055
129.12	0.03237	129.08	0.0538	128.94	0.01873	128.97	0.03061	129.67	0.04022
129.27	0.03272	129.23	0.05396	129.09	0.01865	129.12	0.02967	129.83	0.04041
129.42	0.03252	129.39	0.05407	129.25	0.0186	129.28	0.02963	129.99	0.0402
129.58	0.03216	129.55	0.054	129.41	0.0189	129.44	0.0294	130.14	0.04041
129.73	0.03233	129.7	0.05394	129.56	0.0185	129.59	0.0299	130.3	0.04024
129.89	0.03258	129.86	0.05436	129.72	0.01832	129.75	0.03017	130.45	0.04032
130.05	0.03233	130	0.05419	129.87	0.0185	129.91	0.02922	130.61	0.04022
130.2	0.03245	130.16	0.05396	130.03	0.01863	130.06	0.02884	130.77	0.04024
130.36	0.0321	130.31	0.05384	130.19	0.01844	130.2	0.02949	130.92	0.04018
130.5	0.03256	130.47	0.05404	130.33	0.01852	130.36	0.02986	131.06	0.04026
130.66	0.03291	130.62	0.05413	130.48	0.0184	130.51	0.02924	131.22	0.0402
130.81	0.03357	130.78	0.05398	130.64	0.01863	130.67	0.02862	131.37	0.03984
130.97	0.03384	130.94	0.0539	130.8	0.01898	130.83	0.02893	131.53	0.03991
131.12	0.03353	131.09	0.05404	130.95	0.01883	130.98	0.02855	131.69	0.04007
131.28	0.03337	131.23	0.05406	131.11	0.01832	131.14	0.02959	131.84	0.04003
131.44	0.03337	131.39	0.0539	131.26	0.01829	131.3	0.02924	132	0.03995
131.59	0.0332	131.55	0.05334	131.42	0.01863	131.44	0.02882	132.14	0.03997
131.75	0.0331	131.7	0.05349	131.58	0.01875	131.59	0.02899	132.3	0.04016
131.91	0.03341	131.86	0.05357	131.72	0.01906	131.75	0.02866	132.45	0.04016
132.05	0.03365	132.02	0.05357	131.87	0.01873	131.91	0.02868	132.61	0.04003
132.2	0.03316	132.17	0.05367	132.03	0.01856	132.06	0.02864	132.77	0.04005
132.36	0.03328	132.33	0.05351	132.19	0.01877	132.22	0.0288	132.92	0.03982
132.52	0.0331	132.48	0.05334	132.34	0.01879	132.37	0.02866	133.08	0.03968
132.67	0.03272	132.62	0.05334	132.5	0.01902	132.53	0.02903	133.24	0.03958
132.83	0.03314	132.78	0.05355	132.66	0.01862	132.69	0.02992	133.39	0.03956
132.98	0.03328	132.94	0.05349	132.81	0.01848	132.83	0.02907	133.55	0.03974
133.14	0.03335	133.09	0.05347	132.95	0.01848	132.98	0.0286	133.69	0.03918
133.3	0.03293	133.25	0.05347	133.11	0.01881	133.14	0.0288	133.84	0.03937
133.44	0.03243	133.41	0.05357	133.26	0.01887	133.3	0.02878	134	0.03937
133.59	0.03305	133.56	0.05373	133.42	0.01865	133.45	0.0289	134.16	0.03962
133.75	0.03301	133.72	0.05349	133.58	0.01838	133.61	0.02936	134.31	0.03935
133.91	0.0333	133.86	0.0539	133.73	0.01898	133.76	0.02888	134.47	0.03941
134.06	0.0332	134.02	0.05367	133.89	0.01885	133.92	0.02899	134.62	0.03899
134.22	0.03337	134.17	0.05367	134.05	0.01863	134.06	0.02938	134.77	0.03928
134.37	0.0331	134.33	0.05386	134.2	0.01811	134.22	0.02921	134.92	0.03924
134.53	0.03287	134.48	0.05357	134.34	0.01829	134.37	0.02857	135.08	0.0393
134.67	0.03333	134.64	0.05363	134.5	0.01858	134.53	0.02921	135.24	0.03939
134.83	0.03254	134.8	0.05415	134.66	0.01946	134.69	0.02859	135.39	0.03945
134.98	0.03291	134.95	0.05415	134.81	0.01898	134.84	0.0288	135.55	0.03926
135.14	0.03272	135.11	0.05386	134.97	0.01902	135	0.02888	135.7	0.03845
135.3	0.0331	135.25	0.05342	135.12	0.01829	135.16	0.02921	135.86	0.03806
135.45	0.0326	135.41	0.0534	135.28	0.01856	135.31	0.02959	136.02	0.0385
135.61	0.03274	135.56	0.0538	135.44	0.01887	135.45	0.02922	136.17	0.03845
135.77	0.03324	135.72	0.05367	135.58	0.01873	135.61	0.02928	136.31	0.03833
135.92	0.0331	135.87	0.05349	135.73	0.01867	135.76	0.02909	136.47	0.03845
136.08	0.03301	136.03	0.05347	135.89	0.01838	135.92	0.02928	136.62	0.03852
136.22	0.03285	136.19	0.0538	136.05	0.01844	136.08	0.02959	136.78	0.03866
136.37	0.03262	136.34	0.05409	136.2	0.01867	136.23	0.02949	136.94	0.03852
136.53	0.03268	136.48	0.05413	136.36	0.01844	136.39	0.02957	137.09	0.03848
136.69	0.03282	136.64	0.05404	136.51	0.018	136.55	0.02934	137.25	0.03843
136.84	0.03276	136.8	0.05407	136.67	0.01807	136.69	0.02909	137.39	0.03868
137	0.03295	136.95	0.05409	136.83	0.01836	136.84	0.0298	137.55	0.0385
137.16	0.03289	137.11	0.05419	136.97	0.01925	137.01	0.02963	137.7	0.03875
137.31	0.0328	137.27	0.0544	137.12	0.01892	137.17	0.02917	137.86	0.03916
137.45	0.03254	137.42	0.05428	137.28	0.01856	137.33	0.02919	138.02	0.03918
137.61	0.03227	137.58	0.05432	137.44	0.0185	137.47	0.02907	138.17	0.03916
137.77	0.0321	137.73	0.05434	137.59	0.01838	137.62	0.02921	138.33	0.0391
137.92	0.03206	137.87	0.05413	137.75	0.01885	137.78	0.0294	138.49	0.0391
138.08	0.03224	138.03	0.05404	137.91	0.01873	137.94	0.0299	138.64	0.03924
138.23	0.03282	138.19	0.05404	138.06	0.01817	138.09	0.02953	138.8	0.0393
138.39	0.0328	138.34	0.05402	138.2	0.01817	138.25	0.02986	138.94	0.03912
138.55	0.03312	138.5	0.05384	138.36	0.01842	138.41	0.0293	139.09	0.03906
138.7	0.0327	138.66	0.05371	138.51	0.0185	138.56	0.02936	139.25	0.03893
138.84	0.03283	138.81	0.0538	138.67	0.01879	138.72	0.02901	139.41	0.03918
139	0.03264	138.97	0.0539	138.83	0.01834	138.86	0.0288	139.56	0.0391
139.16	0.03252	139.11	0.05359	138.98	0.01807	139.01	0.02849	139.72	0.03912
139.31	0.03274	139.27	0.05363	139.14	0.0185	139.17	0.02862	139.87	0.03908
139.47	0.0327	139.42	0.05355	139.3	0.01873	139.33	0.031	140.03	0.03914
139.62	0.03237	139.58	0.05361	139.45	0.01871	139.48	0.0309	140.19	0.03926
139.78	0.03227	139.73	0.05404	139.59	0.01832	139.64	0.03005	140.33	0.03943
139.94	0.03301	139.89	0.05373	139.75	0.01817	139.8	0.02947	140.49	0.03912
140.08	0.03297	140.05	0.05365	139.91	0.01817	139.95	0.03011	140.64	0.03951
140.23	0.03299	140.2	0.05376	140.06	0.01815	140.09	0.02994	140.8	0.03997
140.39	0.03241	140.36	0.05423	140.22	0.0186	140.25	0.03036	140.95	0.03953
140.55	0.03297	140.5	0.05436	140.37	0.01817	140.41	0.02963	141.11	0.03947
140.7	0.03312	140.66	0.05421	140.53	0.01823	140.56	0.02884	141.27	0.03949
140.86	0.03328	140.81	0.0538	140.69	0.01834	140.72	0.02911	141.42	0.03951
141.02	0.03318	140.97	0.0539	140.83	0.0189	140.87	0.03024	141.58	0.03978
141.17	0.03335	141.12	0.05413	140.98	0.01896	141.03	0.03059	141.74	0.04011
141.33	0.0332	141.28	0.05428	141.14	0.0189	141.19	0.02994	141.89	0.04011
141.47	0.03256	141.44	0.0543	141.3	0.02066	141.34	0.02945	142.05	0.03999
141.62	0.03168	141.59	0.05413	141.45	0.02413	141.5	0.02936	142.19	0.03995
141.78	0.03187	141.75	0.05432	141.61	0.02114	141.64	0.03	142.34	0.04009
141.94	0.03152	141.91	0.05419	141.76	0.01964	141.8	0.03071	142.5	0.03972
142.09	0.03164	142.06	0.05452	141.92	0.01894	141.95	0.03019	142.66	0.03972
142.25	0.03189	142.2	0.05454	142.08	0.01885	142.11	0.02917	142.81	0.03995
142.41	0.03241	142.36	0.05475	142.22	0.01867	142.26	0.02836	142.97	0.03964
142.56	0.03258	142.52	0.05465	142.37	0.01871	142.42	0.02911	143.12	0.03928
142.7	0.03285	142.67	0.05479	142.53	0.01908	142.58	0.03005	143.28	0.03891
142.86	0.03303	142.83	0.0544	142.69	0.01836	142.72	0.03004	143.44	0.03914
143.02	0.03299	142.98	0.0544	142.84	0.0183	142.87	0.02957	143.59	0.03906
143.17	0.03297	143.14	0.05438	143	0.01867	143.03	0.02909	143.74	0.03893
143.33	0.03293	143.3	0.05438	143.16	0.01894	143.19	0.02911	143.89	0.0387
143.48	0.03305	143.45	0.05487	143.31	0.01892	143.34	0.0293	144.05	0.03873
143.64	0.03306	143.61	0.05434	143.45	0.01869	143.5	0.02874	144.2	0.03887
143.8	0.03318	143.77	0.05428	143.61	0.01832	143.66	0.02868	144.36	0.03901
143.95	0.03337	143.92	0.05428	143.76	0.01825	143.81	0.02932	144.52	0.03879
144.11	0.03357	144.08	0.05428	143.92	0.0185	143.97	0.02976	144.67	0.03922
144.27	0.03359	144.23	0.05407	144.08	0.01863	144.12	0.02895	144.83	0.03904
144.42	0.03274	144.37	0.05386	144.23	0.01817	144.26	0.02888	144.99	0.03903
144.58	0.03278	144.53	0.05392	144.39	0.0183	144.42	0.02868	145.14	0.03903
144.73	0.0327	144.69	0.05344	144.55	0.01854	144.58	0.02857	145.3	0.03873
144.87	0.03266	144.84	0.05336	144.7	0.01867	144.73	0.02957	145.45	0.03875
145.03	0.03293	145	0.05344	144.86	0.01856	144.89	0.03013	145.61	0.03912
145.19	0.03316	145.16	0.05365	145	0.01863	145.05	0.0304	145.77	0.03939
145.34	0.0333	145.31	0.05365	145.16	0.01819	145.2	0.02998	145.92	0.03943
145.5	0.0333	145.47	0.05351	145.31	0.01815	145.36	0.02862	146.08	0.03903
145.66	0.03318	145.62	0.05336	145.47	0.01862	145.51	0.02988	146.24	0.03868
145.81	0.03308	145.78	0.05359	145.62	0.01894	145.67	0.03061	146.39	0.03879
145.97	0.03276	145.94	0.05355	145.78	0.01896	145.83	0.03019	146.55	0.0392
146.12	0.03312	146.09	0.05369	145.94	0.01825	145.98	0.02919	146.69	0.03951
146.28	0.03308	146.25	0.05367	146.09	0.01786	146.14	0.02982	146.84	0.03945
146.44	0.03283	146.41	0.05365	146.25	0.0185	146.3	0.03015	147	0.03951
146.59	0.03264	146.56	0.05376	146.41	0.01883	146.44	0.02957	147.16	0.03922
146.75	0.03258	146.72	0.05371	146.56	0.0189	146.59	0.02897	147.31	0.03933
146.91	0.03305	146.86	0.05373	146.72	0.01854	146.75	0.02936	147.47	0.03891
147.06	0.0325	147.02	0.05384	146.87	0.01846	146.91	0.03015	147.62	0.03914
147.22	0.03177	147.17	0.05378	147.03	0.01869	147.06	0.03017	147.78	0.03947
147.37	0.03164	147.33	0.05363	147.19	0.01888	147.22	0.02974	147.94	0.03928
147.52	0.0315	147.48	0.05363	147.34	0.01854	147.37	0.02957	148.09	0.03922
147.67	0.03177	147.64	0.05361	147.5	0.01823	147.53	0.02926	148.25	0.03922
147.83	0.03214	147.8	0.05373	147.64	0.01786	147.69	0.02951	148.41	0.0393
147.98	0.0322	147.95	0.05342	147.8	0.01807	147.84	0.02928	148.56	0.03897
148.14	0.03222	148.11	0.05321	147.95	0.018	148	0.0284	148.72	0.03845
148.3	0.03328	148.27	0.05351	148.11	0.01802	148.16	0.0294	148.87	0.03862
148.45	0.03283	148.42	0.05392	148.26	0.01788	148.31	0.02868	149.02	0.03885
148.61	0.0325	148.58	0.05407	148.42	0.01755	148.47	0.02866	149.17	0.03881
148.77	0.03252	148.73	0.05411	148.58	0.01788	148.62	0.02905	149.33	0.03906
148.92	0.03256	148.89	0.05363	148.73	0.01811	148.78	0.02893	149.49	0.03904
149.08	0.03197	149.05	0.05363	148.89	0.01792	148.94	0.02841	149.64	0.03903
149.23	0.03193	149.2	0.05369	149.05	0.0178	149.09	0.02888	149.8	0.03899
149.39	0.03179	149.36	0.05378	149.2	0.01763	149.25	0.02872	149.95	0.03935
149.55	0.0321	149.52	0.0543	149.36	0.01817	149.39	0.02921	150.11	0.03953
149.7	0.03185	149.66	0.05417	149.51	0.01871	149.55	0.02917	150.27	0.03924
149.84	0.03197	149.81	0.054	149.67	0.0186	149.7	0.02884	150.42	0.03937
150	0.03118	149.97	0.0539	149.83	0.01811	149.86	0.02807	150.58	0.03931
150.16	0.03146	150.12	0.05421	149.98	0.018	150.01	0.02816	150.74	0.03904
150.31	0.03183	150.28	0.0543	150.12	0.0185	150.17	0.02834	150.89	0.03781
150.47	0.03158	150.44	0.05427	150.28	0.01875	150.33	0.02878	151.05	0.03827
150.62	0.03201	150.59	0.05436	150.44	0.01829	150.48	0.02932	151.2	0.03833
150.78	0.0316	150.75	0.05423	150.59	0.01827	150.64	0.02899	151.36	0.03862
150.94	0.03116	150.91	0.05423	150.75	0.01842	150.8	0.02876	151.52	0.03825
151.09	0.03029	151.06	0.05396	150.91	0.01827	150.95	0.0284	151.67	0.03835
151.25	0.03046	151.22	0.05406	151.06	0.01844	151.11	0.02971	151.81	0.03835
151.41	0.03127	151.37	0.05427	151.22	0.01846	151.26	0.02963	151.97	0.03814
151.56	0.03079	151.53	0.05427	151.37	0.01817	151.42	0.02919	152.12	0.03804
151.72	0.03083	151.69	0.05425	151.53	0.01798	151.58	0.02957	152.28	0.03833
151.87	0.03094	151.84	0.05446	151.69	0.01819	151.72	0.02982	152.44	0.03848
152.03	0.03173	151.98	0.05421	151.84	0.01832	151.87	0.02897	152.59	0.03847
152.19	0.03142	152.14	0.0543	152	0.01836	152.03	0.02884	152.75	0.03848
152.34	0.03142	152.3	0.05457	152.16	0.01805	152.19	0.02868	152.91	0.03816
152.5	0.03156	152.45	0.05432	152.31	0.01782	152.34	0.02841	153.06	0.038
152.64	0.03199	152.61	0.05446	152.47	0.01802	152.5	0.02947	153.22	0.03783
152.8	0.03197	152.77	0.05432	152.62	0.01829	152.66	0.0287	153.37	0.03825
152.95	0.03199	152.92	0.054	152.76	0.01854	152.81	0.02872	153.53	0.03831
153.11	0.03212	153.08	0.05404	152.92	0.01825	152.97	0.02886	153.69	0.03808
153.27	0.03166	153.23	0.05373	153.08	0.01815	153.12	0.02959	153.84	0.03806
153.42	0.03197	153.39	0.05376	153.23	0.0183	153.28	0.02971	154	0.03827
153.58	0.03199	153.55	0.05374	153.39	0.01846	153.44	0.02884	154.14	0.03835
153.73	0.03212	153.7	0.05382	153.55	0.01856	153.59	0.0294	154.3	0.03873
153.89	0.03222	153.86	0.05406	153.7	0.01834	153.75	0.02924	154.45	0.03891
154.05	0.03243	154.02	0.05469	153.86	0.01767	153.91	0.02853	154.61	0.03883
154.2	0.03195	154.17	0.05455	154.01	0.01844	154.06	0.02895	154.77	0.03843
154.36	0.03224	154.33	0.05455	154.17	0.01844	154.22	0.02886	154.92	0.03847
154.52	0.03206	154.48	0.05469	154.33	0.01815	154.37	0.02847	155.08	0.03839
154.67	0.03193	154.64	0.05457	154.48	0.01825	154.51	0.02901	155.24	0.03816
154.83	0.03262	154.78	0.05442	154.64	0.01784	154.67	0.02953	155.39	0.03839
154.97	0.0322	154.94	0.05457	154.8	0.01813	154.83	0.02957	155.55	0.03858
155.12	0.0322	155.09	0.05438	154.95	0.01829	154.98	0.02936	155.7	0.03866
155.28	0.03218	155.25	0.05487	155.11	0.0183	155.14	0.02866	155.86	0.03831
155.44	0.03256	155.41	0.055	155.25	0.01782	155.3	0.02917	156.02	0.03831
155.59	0.03201	155.56	0.05423	155.41	0.01807	155.45	0.02951	156.17	0.03839
155.75	0.03206	155.72	0.05421	155.56	0.01838	155.61	0.02891	156.33	0.03837
155.91	0.03287	155.87	0.05436	155.72	0.01815	155.76	0.02895	156.49	0.03856
156.06	0.03278	156.03	0.05434	155.87	0.01811	155.92	0.02888	156.64	0.03871
156.22	0.03262	156.19	0.05423	156.03	0.01794	156.08	0.02909	156.8	0.03845
156.37	0.0326	156.34	0.05402	156.19	0.01769	156.23	0.02913	156.94	0.03835
156.53	0.03345	156.5	0.0539	156.34	0.01802	156.39	0.02919	157.09	0.0385
156.69	0.03297	156.66	0.05406	156.5	0.01875	156.55	0.02913	157.25	0.03839
156.84	0.03306	156.81	0.05415	156.66	0.0184	156.7	0.02884	157.41	0.03854
157	0.0328	156.97	0.0544	156.81	0.01811	156.84	0.02903	157.56	0.03827
157.16	0.03239	157.11	0.05455	156.97	0.01817	157	0.02924	157.72	0.0382
157.31	0.0328	157.27	0.05452	157.12	0.01807	157.16	0.02882	157.87	0.03829
157.47	0.03237	157.42	0.05461	157.28	0.01846	157.31	0.02996	158.03	0.03833
157.62	0.03235	157.58	0.05454	157.44	0.01838	157.47	0.02986	158.19	0.03798
157.77	0.03282	157.73	0.05444	157.59	0.01811	157.62	0.02893	158.34	0.038
157.92	0.03326	157.89	0.05438	157.75	0.01784	157.78	0.02853	158.5	0.03771
158.08	0.03276	158.05	0.05496	157.89	0.01796	157.94	0.0287	158.66	0.03808
158.23	0.03326	158.2	0.05498	158.05	0.01796	158.09	0.02886	158.81	0.03796
158.39	0.0331	158.36	0.05515	158.2	0.01775	158.25	0.02905	158.97	0.0376
158.55	0.03322	158.52	0.05531	158.36	0.01786	158.41	0.02868	159.12	0.03779
158.7	0.03283	158.67	0.05508	158.51	0.01782	158.56	0.02921	159.27	0.03773
158.86	0.03324	158.83	0.05465	158.67	0.01794	158.72	0.02969	159.42	0.03794
159.02	0.0331	158.98	0.05465	158.83	0.01832	158.87	0.02945	159.58	0.03789
159.17	0.03276	159.14	0.05502	158.98	0.01796	159.03	0.02955	159.74	0.03787
159.33	0.03326	159.3	0.05508	159.14	0.01773	159.19	0.02921	159.89	0.03737
159.48	0.03341	159.45	0.05463	159.3	0.01792	159.34	0.02957	160.05	0.03756
159.64	0.03318	159.61	0.05402	159.45	0.01796	159.5	0.02919	160.2	0.03758
159.8	0.03291	159.77	0.05446	159.61	0.0183	159.64	0.02891	160.36	0.03766
159.95	0.03308	159.91	0.05448	159.76	0.01813	159.8	0.02864	160.52	0.03777
160.09	0.0331	160.06	0.05444	159.92	0.01844	159.95	0.02872	160.67	0.03792
160.25	0.0327	160.22	0.05488	160.08	0.01834	160.11	0.02822	160.83	0.03748
160.41	0.03301	160.37	0.05511	160.23	0.01813	160.26	0.02864	160.99	0.03762
160.56	0.03322	160.53	0.05533	160.37	0.01865	160.42	0.02859	161.14	0.03787
160.72	0.03357	160.69	0.05538	160.53	0.01838	160.58	0.02872	161.3	0.03775
160.87	0.03295	160.84	0.05517	160.69	0.018	160.73	0.02764	161.45	0.03796
161.03	0.03295	161	0.05498	160.84	0.0178	160.89	0.02799	161.61	0.03804
161.19	0.03254	161.16	0.05506	161	0.01802	161.05	0.02855	161.77	0.03798
161.34	0.03218	161.31	0.05504	161.16	0.01823	161.2	0.02799	161.92	0.03787
161.5	0.03274	161.47	0.05475	161.31	0.01813	161.36	0.02809	162.06	0.03798
161.66	0.03297	161.62	0.05459	161.47	0.01782	161.51	0.02766	162.22	0.03752
161.81	0.03301	161.78	0.05479	161.62	0.01798	161.67	0.02741	162.37	0.03775
161.97	0.03245	161.94	0.05471	161.78	0.01844	161.83	0.02826	162.53	0.03767
162.12	0.03287	162.09	0.055	161.94	0.01834	161.97	0.02805	162.69	0.03796
162.28	0.03289	162.23	0.05562	162.09	0.01834	162.12	0.02826	162.84	0.03771
162.44	0.03237	162.39	0.05556	162.25	0.01788	162.28	0.02862	163	0.03764
162.59	0.0327	162.55	0.05542	162.41	0.018	162.44	0.02864	163.16	0.03762
162.75	0.03283	162.7	0.05562	162.56	0.01832	162.59	0.02872	163.31	0.03762
162.91	0.03337	162.86	0.0561	162.72	0.01844	162.75	0.0288	163.47	0.03777
163.05	0.03316	163.02	0.05623	162.87	0.01827	162.91	0.02807	163.62	0.03779
163.2	0.03324	163.17	0.05579	163.01	0.01798	163.06	0.02847	163.78	0.03766
163.36	0.03283	163.33	0.05596	163.17	0.01788	163.22	0.02853	163.94	0.03769
163.52	0.03272	163.48	0.05592	163.33	0.01819	163.37	0.02783	164.09	0.03779
163.67	0.0332	163.64	0.05575	163.48	0.01844	163.53	0.02774	164.25	0.03777
163.83	0.03341	163.8	0.05589	163.64	0.01834	163.69	0.02826	164.39	0.03731
163.98	0.03314	163.95	0.05554	163.8	0.01827	163.84	0.02891	164.55	0.03709
164.14	0.03285	164.11	0.05525	163.95	0.01796	164	0.03004	164.7	0.037
164.3	0.03332	164.27	0.05496	164.11	0.01844	164.16	0.02996	164.86	0.03681
164.45	0.03316	164.42	0.05452	164.26	0.01898	164.31	0.03021	165.02	0.0369
164.61	0.03278	164.58	0.05483	164.42	0.01854	164.47	0.02957	165.17	0.037
164.77	0.03278	164.73	0.05496	164.58	0.01798	164.62	0.02832	165.33	0.03692
164.92	0.03305	164.89	0.05488	164.73	0.01811	164.76	0.02905	165.49	0.03702
165.08	0.03258	165.03	0.05521	164.89	0.01834	164.92	0.02866	165.64	0.0369
165.23	0.03168	165.19	0.05523	165.05	0.01875	165.08	0.02809	165.8	0.03719
165.39	0.0312	165.34	0.05535	165.2	0.01854	165.23	0.02809	165.95	0.03686
165.55	0.03231	165.5	0.05529	165.36	0.01854	165.39	0.02841	166.11	0.03719
165.7	0.03208	165.66	0.05521	165.5	0.01871	165.55	0.02855	166.27	0.03708
165.84	0.03202	165.81	0.05515	165.66	0.01885	165.7	0.0284	166.42	0.0369
166	0.03183	165.97	0.05513	165.81	0.01894	165.86	0.02807	166.58	0.03715
166.16	0.03166	166.12	0.05508	165.97	0.01848	166.01	0.02774	166.74	0.03735
166.31	0.03144	166.28	0.05531	166.12	0.01817	166.17	0.02764	166.89	0.03779
166.47	0.03139	166.44	0.05519	166.28	0.01821	166.33	0.02826	167.05	0.03766
166.62	0.0321	166.59	0.05544	166.44	0.01838	166.48	0.02751	167.19	0.03775
166.78	0.03187	166.75	0.0556	166.59	0.0186	166.64	0.02783	167.34	0.03758
166.94	0.03148	166.91	0.05581	166.75	0.01856	166.8	0.02818	167.5	0.03748
167.09	0.03225	167.06	0.05587	166.91	0.01836	166.95	0.02789	167.66	0.03717
167.25	0.03258	167.22	0.05606	167.06	0.01869	167.09	0.02803	167.81	0.03686
167.41	0.03201	167.37	0.05556	167.22	0.01871	167.25	0.02749	167.97	0.037
167.56	0.03152	167.53	0.05544	167.37	0.01888	167.41	0.0276	168.12	0.03735
167.72	0.03088	167.69	0.05521	167.53	0.0183	167.56	0.02762	168.28	0.03748
167.87	0.03135	167.84	0.05585	167.69	0.01832	167.72	0.02766	168.44	0.03783
168.03	0.03156	167.98	0.05585	167.84	0.01836	167.87	0.02787	168.59	0.03779
168.19	0.03144	168.14	0.056	168	0.01862	168.03	0.02757	168.75	0.0374
168.34	0.03102	168.3	0.05589	168.14	0.01906	168.19	0.02793	168.91	0.03702
168.5	0.0304	168.45	0.05604	168.3	0.01894	168.34	0.02797	169.06	0.03721
168.64	0.03079	168.61	0.05581	168.45	0.01836	168.5	0.02772	169.22	0.03754
168.8	0.03102	168.77	0.05566	168.61	0.01871	168.66	0.02774	169.37	0.03746
168.95	0.03123	168.92	0.05585	168.76	0.01906	168.81	0.0277	169.52	0.03715
169.11	0.03048	169.08	0.05571	168.92	0.01865	168.97	0.02781	169.67	0.03711
169.27	0.02994	169.23	0.05573	169.08	0.01846	169.12	0.02805	169.83	0.03727
169.42	0.03088	169.39	0.05592	169.23	0.01869	169.28	0.02803	169.99	0.0369
169.58	0.0311	169.55	0.05589	169.39	0.01892	169.44	0.02743	170.14	0.03706
169.73	0.03125	169.7	0.05571	169.55	0.01848	169.59	0.02762	170.3	0.03708
169.89	0.03092	169.86	0.05596	169.7	0.01856	169.75	0.02733	170.45	0.03686
170.05	0.03102	170.02	0.05598	169.86	0.01854	169.89	0.02749	170.61	0.03686
170.2	0.03166	170.17	0.05606	170.01	0.0184	170.05	0.0277	170.77	0.03706
170.36	0.0312	170.33	0.05641	170.17	0.01836	170.2	0.0277	170.92	0.03686
170.52	0.0311	170.48	0.05649	170.33	0.01881	170.36	0.02747	171.08	0.03737
170.67	0.03141	170.64	0.05668	170.48	0.01881	170.51	0.02779	171.24	0.03688
170.83	0.03127	170.78	0.05639	170.62	0.01871	170.67	0.02864	171.39	0.03681
170.98	0.03104	170.94	0.05664	170.78	0.01867	170.83	0.02893	171.55	0.0374
171.12	0.03067	171.09	0.05623	170.94	0.01883	170.98	0.02797	171.7	0.03729
171.28	0.03031	171.25	0.0561	171.09	0.01885	171.14	0.02689	171.86	0.03713
171.44	0.03044	171.41	0.05627	171.25	0.01879	171.3	0.02683	172.02	0.0374
171.59	0.03114	171.56	0.05641	171.41	0.01844	171.45	0.02795	172.17	0.03733
171.75	0.03092	171.72	0.05618	171.56	0.01832	171.61	0.02772	172.33	0.03733
171.91	0.03094	171.87	0.05627	171.72	0.01865	171.76	0.02801	172.49	0.03729
172.06	0.03075	172.03	0.05625	171.87	0.01941	171.92	0.02731	172.64	0.03742
172.22	0.03079	172.19	0.05639	172.03	0.01875	172.08	0.02731	172.8	0.03766
172.37	0.03092	172.34	0.05627	172.19	0.01873	172.22	0.02781	172.94	0.03746
172.53	0.03106	172.5	0.05633	172.34	0.0189	172.37	0.02759	173.09	0.03789
172.69	0.03094	172.66	0.05639	172.5	0.01911	172.53	0.02743	173.25	0.0382
172.84	0.03135	172.81	0.05627	172.66	0.01939	172.69	0.02766	173.41	0.03787
173	0.03148	172.97	0.05627	172.81	0.01925	172.84	0.02759	173.56	0.03796
173.16	0.03098	173.11	0.05618	172.97	0.01894	173	0.0272	173.72	0.03814
173.31	0.03067	173.27	0.05639	173.12	0.01888	173.16	0.0267	173.87	0.0382
173.47	0.03133	173.42	0.05643	173.26	0.01887	173.31	0.0266	174.03	0.03781
173.62	0.03096	173.58	0.05639	173.42	0.01865	173.47	0.02664	174.19	0.03806
173.77	0.03133	173.73	0.05645	173.58	0.0186	173.62	0.02652	174.34	0.03777
173.92	0.03141	173.89	0.05641	173.73	0.01832	173.78	0.02666	174.5	0.03769
174.08	0.03131	174.05	0.05625	173.89	0.01852	173.94	0.02716	174.67	0.03752
174.23	0.03114	174.2	0.056	174.05	0.01888	174.09	0.02672	174.81	0.03756
174.39	0.0312	174.36	0.05623	174.2	0.01904	174.25	0.02768	174.97	0.03729
174.55	0.0316	174.52	0.05625	174.36	0.01865	174.41	0.02735	175.14	0.03752
174.7	0.03171	174.67	0.056	174.51	0.0186	174.56	0.02668	175.3	0.03739
174.86	0.03245	174.83	0.05596	174.67	0.01856	174.72	0.0261	175.45	0.0376
175.02	0.03225	174.98	0.05619	174.83	0.01937	174.87	0.02641	175.61	0.03731
175.17	0.03201	175.14	0.05612	174.98	0.019	175.01	0.02627	175.77	0.03733
175.33	0.03201	175.3	0.05633	175.14	0.01888	175.17	0.02648	175.92	0.03739
175.48	0.03214	175.45	0.05643	175.3	0.0185	175.34	0.0267	176.08	0.03731
175.64	0.03227	175.61	0.05645	175.45	0.01885	175.5	0.02681	176.24	0.03702
175.8	0.03278	175.77	0.05643	175.61	0.01902	175.64	0.02631	176.39	0.03708
175.95	0.03258	175.92	0.05654	175.75	0.01881	175.8	0.02612	176.55	0.03696
176.11	0.03222	176.08	0.05629	175.91	0.01846	175.95	0.02573	176.7	0.03704
176.27	0.03224	176.23	0.05643	176.06	0.01838	176.11	0.02658	176.86	0.03731
176.42	0.03177	176.39	0.05645	176.22	0.01827	176.26	0.02625	177.02	0.03706
176.58	0.03171	176.55	0.05618	176.37	0.01873	176.42	0.02615	177.17	0.03704
176.73	0.0321	176.7	0.05652	176.53	0.01873	176.58	0.02598	177.33	0.03719
176.89	0.03243	176.86	0.05635	176.69	0.01832	176.73	0.02602	177.49	0.03704
177.05	0.0325	177.02	0.05637	176.84	0.01829	176.89	0.02658	177.64	0.03709
177.2	0.03235	177.17	0.05656	177	0.01856	177.05	0.02646	177.8	0.03698
177.36	0.03202	177.33	0.05641	177.16	0.01852	177.2	0.02679	177.95	0.03685
177.52	0.03171	177.48	0.05681	177.31	0.0185	177.36	0.02602	178.11	0.03686
177.67	0.03173	177.64	0.05681	177.47	0.01834	177.51	0.02608	178.27	0.03771
177.83	0.03187	177.8	0.05662	177.62	0.01827	177.67	0.02648	178.42	0.03781
177.98	0.0322	177.95	0.05681	177.78	0.01825	177.83	0.02643	178.58	0.03787
178.14	0.03222	178.11	0.05664	177.94	0.01879	177.98	0.02654	178.74	0.03792
178.3	0.03164	178.27	0.05668	178.09	0.01844	178.14	0.02633	178.89	0.03812
178.45	0.03146	178.42	0.05681	178.25	0.01821	178.3	0.02604	179.05	0.03783
178.61	0.03129	178.58	0.05687	178.41	0.01805	178.45	0.02579	179.2	0.03758
178.77	0.03173	178.73	0.05708	178.56	0.01834	178.61	0.02679	179.36	0.03771
178.92	0.03177	178.89	0.05704	178.72	0.01832	178.76	0.0266	179.52	0.03779
179.08	0.0321	179.05	0.05706	178.87	0.0186	178.92	0.02598	179.67	0.03758
179.23	0.03191	179.2	0.05704	179.03	0.0183	179.08	0.02581	179.83	0.03762
179.39	0.0316	179.36	0.057	179.2	0.0183	179.23	0.02631	179.99	0.03756
179.55	0.03171	179.52	0.05689	179.34	0.0186	179.39	0.02621	180.14	0.03744
179.7	0.03187	179.67	0.05708	179.5	0.01879	179.55	0.02623	180.3	0.03783
179.86	0.0322	179.83	0.05737	179.67	0.01813	179.7	0.02589	180.45	0.0375
180.02	0.03218	179.98	0.05768	179.83	0.01794	179.86	0.02656	180.61	0.03725
180.17	0.03231	180.14	0.05749	179.98	0.01829	180.01	0.02652	180.77	0.03713
180.33	0.03339	180.3	0.05724	180.12	0.01854	180.17	0.02654	180.92	0.03752
180.48	0.03343	180.45	0.05685	180.3	0.01871	180.33	0.02639	181.08	0.03785
180.64	0.03295	180.61	0.0567	180.45	0.01852	180.48	0.02556	181.24	0.03781
180.8	0.03252	180.77	0.05679	180.61	0.01842	180.64	0.02573	181.39	0.03781
180.95	0.03264	180.92	0.05668	180.75	0.01869	180.8	0.02593	181.55	0.03771
181.11	0.03208	181.08	0.05666	180.92	0.01892	180.95	0.02621	181.7	0.03721
181.27	0.03222	181.23	0.05652	181.08	0.01867	181.11	0.02627	181.86	0.03735
181.42	0.03191	181.39	0.05649	181.23	0.01858	181.26	0.02571	182.02	0.03783
181.58	0.03224	181.55	0.05645	181.37	0.01854	181.42	0.02615	182.17	0.03773
181.73	0.03218	181.7	0.05643	181.55	0.0184	181.58	0.0265	182.33	0.03812
181.89	0.03214	181.86	0.05633	181.7	0.01885	181.73	0.02698	182.49	0.03746
182.05	0.03278	182.02	0.05621	181.86	0.01887	181.89	0.02643	182.64	0.03779
182.2	0.03262	182.17	0.056	182	0.01846	182.05	0.02635	182.8	0.03771
182.36	0.03225	182.33	0.05577	182.17	0.01832	182.2	0.02641	182.95	0.03794
182.52	0.03254	182.48	0.05573	182.33	0.0185	182.36	0.0266	183.11	0.03808
182.67	0.03169	182.64	0.0561	182.48	0.01904	182.51	0.02542	183.27	0.03812
182.83	0.03183	182.8	0.05623	182.62	0.01856	182.67	0.02571	183.42	0.03798
182.98	0.03187	182.95	0.056	182.8	0.01815	182.83	0.02589	183.58	0.03827
183.14	0.0322	183.11	0.05585	182.95	0.01796	182.98	0.0261	183.74	0.03843
183.3	0.03197	183.27	0.05583	183.11	0.0183	183.14	0.02656	183.89	0.03798
183.45	0.03156	183.42	0.05587	183.25	0.01869	183.3	0.02654	184.05	0.03823
183.61	0.03222	183.58	0.05587	183.42	0.01865	183.45	0.02641	184.2	0.03779
183.77	0.03308	183.73	0.05591	183.58	0.01802	183.61	0.02664	184.36	0.03766
183.92	0.03308	183.89	0.05606	183.73	0.01823	183.76	0.02656	184.52	0.03766
184.08	0.03297	184.05	0.05616	183.87	0.01848	183.92	0.02672	184.67	0.03756
184.23	0.0325	184.2	0.05608	184.05	0.0185	184.08	0.02672	184.83	0.03708
184.39	0.03204	184.36	0.05571	184.2	0.01829	184.23	0.02687	184.99	0.03789
184.55	0.0309	184.52	0.05602	184.36	0.0184	184.39	0.02658	185.14	0.03825
184.7	0.03127	184.67	0.05608	184.5	0.01836	184.55	0.02589	185.3	0.03837
184.86	0.03142	184.83	0.05612	184.67	0.01885	184.7	0.02585	185.45	0.03829
185.02	0.03177	184.98	0.05606	184.83	0.01888	184.86	0.02577	185.61	0.03833
185.17	0.03135	185.14	0.05625	184.98	0.01873	185.01	0.02534	185.77	0.03848
185.33	0.03114	185.3	0.05608	185.12	0.01844	185.17	0.02569	185.92	0.03852
185.48	0.03162	185.45	0.05625	185.3	0.01827	185.33	0.02575	186.08	0.03845
185.64	0.03142	185.61	0.05612	185.45	0.01869	185.48	0.02595	186.24	0.03835
185.8	0.03154	185.77	0.05612	185.61	0.01883	185.64	0.02536	186.39	0.03839
185.95	0.03195	185.92	0.05589	185.75	0.01935	185.8	0.02531	186.55	0.0382
186.11	0.03199	186.08	0.05602	185.92	0.01871	185.95	0.02546	186.7	0.0385
186.27	0.03243	186.23	0.05614	186.08	0.01852	186.11	0.0255	186.86	0.0386
186.42	0.03247	186.39	0.05602	186.23	0.01881	186.26	0.02587	187.02	0.03908
186.58	0.0327	186.55	0.05612	186.37	0.01921	186.42	0.0255	187.17	0.03901
186.73	0.03204	186.7	0.05614	186.55	0.01904	186.58	0.02486	187.33	0.0387
186.89	0.03187	186.86	0.05604	186.7	0.01879	186.73	0.02554	187.49	0.03827
187.05	0.03206	187.02	0.0561	186.86	0.01862	186.89	0.026	187.64	0.03858
187.2	0.03214	187.17	0.0556	187	0.01883	187.05	0.0254	187.8	0.03847
187.36	0.03195	187.33	0.0554	187.17	0.01927	187.2	0.02596	187.95	0.03837
187.52	0.03185	187.48	0.05546	187.33	0.01879	187.36	0.02587	188.11	0.0381
187.67	0.03201	187.64	0.05554	187.48	0.01875	187.51	0.02564	188.27	0.0379
187.83	0.03197	187.8	0.0556	187.62	0.01879	187.67	0.02585	188.42	0.03812
187.98	0.03164	187.95	0.05556	187.8	0.01923	187.83	0.02585	188.58	0.03783
188.14	0.03162	188.11	0.05537	187.95	0.01939	187.98	0.02591	188.74	0.03796
188.3	0.03162	188.27	0.05533	188.11	0.01908	188.14	0.02571	188.89	0.03814
188.45	0.03177	188.42	0.05575	188.25	0.01881	188.3	0.02556	189.05	0.0382
188.61	0.03164	188.58	0.05577	188.42	0.01898	188.45	0.026	189.2	0.03802
188.77	0.03139	188.73	0.05575	188.58	0.01952	188.61	0.02531	189.36	0.03843
188.92	0.03144	188.89	0.05633	188.73	0.01975	188.76	0.02606	189.52	0.03862
189.08	0.03148	189.05	0.05581	188.87	0.01898	188.92	0.02641	189.67	0.03864
189.23	0.031	189.2	0.05562	189.05	0.01896	189.08	0.02593	189.83	0.03823
189.39	0.03142	189.36	0.05554	189.2	0.01933	189.23	0.02591	189.99	0.03785
189.55	0.03168	189.52	0.0555	189.36	0.01981	189.39	0.02583	190.14	0.03816
189.7	0.03187	189.67	0.05523	189.5	0.01958	189.55	0.02573	190.3	0.03742
189.86	0.03185	189.83	0.05525	189.67	0.01917	189.7	0.02598	190.45	0.0358
190.02	0.03229	189.98	0.05527	189.83	0.01883	189.86	0.02598	190.61	0.03621
190.17	0.03202	190.14	0.05548	189.98	0.01917	190.01	0.02558	190.77	0.03686
190.33	0.03156	190.3	0.05556	190.12	0.01962	190.17	0.02533	190.92	0.03731
190.48	0.03195	190.45	0.0555	190.3	0.01904	190.33	0.02529	191.08	0.03796
190.64	0.03204	190.61	0.0556	190.45	0.01865	190.48	0.02552	191.24	0.03794
190.8	0.03195	190.77	0.05577	190.61	0.01873	190.64	0.02533	191.39	0.0379
190.95	0.03146	190.92	0.05581	190.75	0.01892	190.8	0.02608	191.55	0.03781
191.11	0.03175	191.08	0.05571	190.92	0.01923	190.95	0.02612	191.7	0.0379
191.27	0.03152	191.23	0.05554	191.08	0.01919	191.11	0.02519	191.86	0.03764
191.42	0.03121	191.39	0.05566	191.23	0.01877	191.26	0.02567	192.02	0.03742
191.58	0.03152	191.55	0.05587	191.37	0.01879	191.42	0.02625	192.17	0.03752
191.73	0.03173	191.7	0.05594	191.55	0.01898	191.58	0.02621	192.33	0.03764
191.89	0.03127	191.86	0.05573	191.7	0.01923	191.73	0.02577	192.49	0.03762
192.05	0.03135	192.02	0.0554	191.86	0.01925	191.89	0.02546	192.64	0.03762
192.2	0.0315	192.17	0.05537	192	0.01865	192.05	0.02565	192.8	0.0374
192.36	0.03137	192.33	0.0556	192.17	0.01838	192.2	0.02538	192.95	0.03733
192.52	0.03133	192.48	0.05573	192.33	0.01873	192.36	0.02515	193.11	0.03767
192.67	0.03073	192.64	0.05587	192.48	0.01881	192.51	0.02564	193.27	0.03729
192.83	0.0311	192.8	0.05589	192.62	0.01875	192.67	0.0256	193.42	0.03715
192.98	0.03098	192.95	0.0561	192.8	0.01844	192.83	0.02558	193.58	0.03704
193.14	0.0312	193.12	0.05598	192.95	0.01844	192.98	0.02598	193.74	0.03721
193.3	0.03108	193.28	0.05591	193.11	0.01863	193.14	0.02635	193.89	0.03742
193.45	0.03139	193.44	0.05587	193.25	0.01883	193.3	0.02639	194.05	0.03775
193.61	0.03131	193.59	0.05587	193.42	0.0185	193.45	0.02596	194.2	0.0376
193.77	0.03067	193.75	0.05614	193.58	0.01842	193.61	0.02643	194.36	0.03752
193.92	0.03106	193.91	0.05621	193.73	0.01832	193.76	0.02581	194.52	0.03752
194.08	0.03121	194.06	0.05625	193.87	0.01904	193.92	0.02596	194.67	0.03717
194.23	0.03148	194.22	0.05616	194.05	0.01911	194.08	0.0261	194.83	0.03744
194.39	0.0309	194.37	0.0561	194.2	0.01873	194.23	0.02585	194.99	0.03731
194.55	0.03058	194.53	0.05608	194.36	0.01858	194.39	0.02604	195.14	0.03729
194.7	0.03027	194.69	0.0561	194.5	0.01846	194.55	0.02581	195.3	0.03723
194.86	0.03031	194.84	0.05623	194.67	0.01892	194.7	0.0254	195.45	0.03729
195.02	0.03037	195	0.05635	194.83	0.01888	194.86	0.02567	195.61	0.03644
195.17	0.03033	195.16	0.05618	194.98	0.0185	195.01	0.02585	195.77	0.03675
195.33	0.03067	195.31	0.05614	195.12	0.01832	195.17	0.0254	195.92	0.03675
195.48	0.03038	195.47	0.05618	195.3	0.01838	195.33	0.02602	196.08	0.03698
195.64	0.03017	195.62	0.0561	195.45	0.01869	195.48	0.0256	196.24	0.03656
195.8	0.03007	195.78	0.05602	195.61	0.01836	195.64	0.02536	196.39	0.03652
195.95	0.03013	195.94	0.05585	195.75	0.01848	195.8	0.02542	196.55	0.03632
196.11	0.02984	196.09	0.05592	195.92	0.01856	195.95	0.02575	196.7	0.03654
196.27	0.03017	196.25	0.05618	196.08	0.01856	196.11	0.02573	196.86	0.03644
196.42	0.03017	196.41	0.05635	196.23	0.01863	196.26	0.02581	197.02	0.03634
196.58	0.03054	196.56	0.05635	196.37	0.01931	196.42	0.02615	197.17	0.03621
196.73	0.0305	196.72	0.05631	196.55	0.01917	196.58	0.02587	197.33	0.03534
196.89	0.03031	196.87	0.05614	196.7	0.01854	196.73	0.02596	197.49	0.0354
197.05	0.0305	197.03	0.05577	196.86	0.01877	196.89	0.02606	197.64	0.03528
197.2	0.03216	197.19	0.05564	197	0.01852	197.05	0.02562	197.8	0.03542
197.36	0.03229	197.34	0.05488	197.17	0.01871	197.2	0.02552	197.95	0.0354
197.52	0.03195	197.5	0.05473	197.33	0.01856	197.36	0.02569	198.11	0.03569
197.67	0.03169	197.66	0.05485	197.48	0.01836	197.51	0.02595	198.27	0.03569
197.83	0.03137	197.81	0.05485	197.62	0.01827	197.67	0.02573	198.42	0.03588
197.98	0.03139	197.97	0.05461	197.8	0.01863	197.83	0.02531	198.58	0.03571
198.14	0.03154	198.12	0.05467	197.95	0.01887	197.98	0.02525	198.74	0.03582
198.3	0.03148	198.28	0.05457	198.11	0.01848	198.14	0.0254	198.89	0.03594
198.45	0.03173	198.44	0.05479	198.25	0.01809	198.3	0.02585	199.05	0.03567
198.61	0.03166	198.59	0.05479	198.42	0.01836	198.45	0.02531	199.2	0.0359
198.77	0.03222	198.75	0.05481	198.58	0.01867	198.61	0.02521	199.36	0.03598
198.92	0.03231	198.91	0.05483	198.73	0.01869	198.76	0.02525	199.52	0.03586
199.08	0.0315	199.06	0.05496	198.87	0.01887	198.92	0.02579	199.67	0.03571
199.23	0.03121	199.22	0.05502	199.05	0.01842	199.08	0.02538	199.83	0.03596
199.39	0.03146	199.37	0.05479	199.2	0.01842	199.23	0.02569	199.99	0.03596
199.55	0.03098	199.53	0.055	199.36	0.01871	199.39	0.02606	200.14	0.03588
199.7	0.03088	199.69	0.05535	199.5	0.01856	199.55	0.02546	200.3	0.03536
199.86	0.03088	199.84	0.05579	199.67	0.01815	199.7	0.02534	200.45	0.03582
200.02	0.0306	200	0.05548	199.83	0.0179	199.86	0.02573	200.61	0.03598
200.17	0.03056	200.16	0.05531	199.98	0.0179	200.01	0.02571	200.77	0.03598
200.33	0.03063	200.31	0.05544	200.12	0.01829	200.17	0.02631	200.92	0.03598
200.48	0.03065	200.47	0.0556	200.3	0.01881	200.33	0.02562	201.08	0.03578
200.64	0.03046	200.62	0.05562	200.45	0.0186	200.48	0.0254	201.24	0.03571
200.8	0.03071	200.78	0.05548	200.61	0.01854	200.64	0.02546	201.39	0.03577
200.95	0.03104	200.94	0.0557	200.75	0.01873	200.8	0.02523	201.55	0.03557
201.11	0.0309	201.09	0.05573	200.92	0.01898	200.95	0.0249	201.7	0.03586
201.27	0.03052	201.25	0.05583	201.08	0.01881	201.11	0.02506	201.86	0.03586
201.42	0.03067	201.41	0.05579	201.23	0.01858	201.26	0.02514	202.02	0.03584
201.58	0.03071	201.56	0.05589	201.37	0.01802	201.42	0.02502	202.17	0.03598
201.73	0.03033	201.72	0.05608	201.55	0.01796	201.58	0.0254	202.33	0.03619
201.89	0.03042	201.87	0.05608	201.7	0.01838	201.73	0.025	202.49	0.0364
202.05	0.0306	202.03	0.05635	201.86	0.01871	201.89	0.02469	202.64	0.03638
202.2	0.03037	202.19	0.05631	202	0.01832	202.05	0.02496	202.8	0.03663
202.36	0.03029	202.34	0.05616	202.17	0.01825	202.2	0.02494	202.95	0.03652
202.52	0.03056	202.5	0.05627	202.33	0.01823	202.36	0.02512	203.11	0.03661
202.67	0.03075	202.66	0.05647	202.48	0.01813	202.51	0.02552	203.27	0.03658
202.83	0.031	202.81	0.05621	202.62	0.01875	202.67	0.02527	203.42	0.03673
202.98	0.03112	202.97	0.05666	202.8	0.0184	202.83	0.02523	203.58	0.03679
203.14	0.03114	203.12	0.0566	202.95	0.01809	202.98	0.02531	203.74	0.03661
203.3	0.03075	203.28	0.05662	203.11	0.018	203.14	0.0256	203.89	0.03681
203.45	0.03102	203.44	0.05685	203.25	0.01804	203.3	0.02577	204.05	0.03661
203.61	0.0316	203.59	0.05675	203.42	0.01856	203.45	0.0255	204.2	0.03663
203.77	0.03116	203.75	0.05668	203.58	0.01836	203.61	0.02521	204.36	0.0363
203.92	0.03083	203.91	0.05673	203.73	0.01796	203.76	0.02542	204.52	0.03626
204.08	0.0305	204.06	0.05689	203.87	0.01794	203.92	0.02569	204.67	0.03588
204.23	0.03035	204.22	0.05681	204.05	0.01858	204.08	0.02571	204.83	0.03615
204.39	0.03077	204.37	0.05677	204.2	0.01917	204.23	0.02567	204.99	0.03642
204.55	0.03116	204.53	0.05683	204.36	0.01858	204.39	0.02544	205.14	0.03644
204.7	0.031	204.69	0.05704	204.5	0.0179	204.55	0.02565	205.3	0.03679
204.86	0.03094	204.84	0.05732	204.67	0.01804	204.7	0.02556	205.45	0.03671
205.02	0.03118	205	0.0573	204.83	0.01838	204.86	0.02564	205.61	0.03663
205.17	0.03088	205.16	0.0573	204.98	0.01838	205.01	0.02567	205.77	0.03648
205.33	0.03087	205.31	0.05728	205.14	0.0183	205.17	0.02538	205.92	0.0363
205.48	0.03102	205.47	0.05716	205.3	0.01817	205.33	0.02519	206.08	0.03613
205.64	0.03102	205.62	0.05706	205.45	0.01802	205.48	0.02534	206.24	0.03625
205.8	0.03104	205.78	0.05718	205.61	0.01794	205.64	0.02567	206.39	0.03611
205.95	0.03104	205.94	0.05741	205.76	0.01821	205.8	0.02531	206.55	0.03602
206.11	0.03106	206.09	0.05756	205.92	0.01834	205.95	0.02519	206.7	0.03569
206.27	0.0311	206.25	0.0576	206.08	0.01825	206.11	0.02506	206.86	0.0358
206.42	0.03083	206.41	0.05768	206.23	0.01819	206.26	0.02483	207.02	0.0358
206.58	0.03067	206.56	0.05745	206.39	0.01821	206.42	0.02506	207.17	0.0359
206.73	0.03098	206.72	0.05758	206.55	0.01848	206.58	0.02534	207.33	0.0359
206.89	0.03077	206.87	0.05751	206.7	0.01894	206.73	0.02548	207.49	0.03602
207.05	0.03096	207.03	0.05753	206.86	0.01877	206.89	0.02548	207.64	0.03603
207.2	0.03079	207.19	0.05766	207.01	0.01867	207.05	0.02575	207.8	0.03613
207.36	0.0305	207.34	0.05782	207.17	0.0186	207.2	0.02552	207.95	0.03658
207.52	0.0305	207.5	0.05797	207.33	0.0186	207.36	0.02593	208.11	0.0365
207.67	0.0309	207.66	0.05809	207.48	0.019	207.51	0.02587	208.27	0.0363
207.83	0.03114	207.81	0.05816	207.64	0.01852	207.67	0.026	208.42	0.03613
207.98	0.0309	207.97	0.05797	207.8	0.01823	207.83	0.02562	208.58	0.03617
208.16	0.03054	208.12	0.0578	207.95	0.01836	207.98	0.02573	208.74	0.03611
208.31	0.03007	208.28	0.05805	208.11	0.01879	208.14	0.02562	208.89	0.03603
208.47	0.03013	208.44	0.05811	208.26	0.01913	208.3	0.02536	209.05	0.03621
208.62	0.03038	208.59	0.05807	208.42	0.01892	208.45	0.02521	209.22	0.03644
208.78	0.03075	208.75	0.05809	208.58	0.01832	208.61	0.02575	209.37	0.03638
208.94	0.03083	208.91	0.05818	208.73	0.01825	208.76	0.02575	209.53	0.03625
209.09	0.03079	209.08	0.05813	208.89	0.01858	208.92	0.02587	209.69	0.036
209.25	0.03077	209.23	0.05818	209.05	0.01865	209.08	0.02567	209.84	0.03603
209.41	0.03063	209.39	0.05785	209.2	0.0184	209.23	0.02558	210	0.03638
209.56	0.03079	209.55	0.05758	209.36	0.01805	209.39	0.02552	210.16	0.03634
209.72	0.03088	209.7	0.05787	209.51	0.01813	209.55	0.02575	210.31	0.03638
209.87	0.03063	209.86	0.05803	209.67	0.01852	209.72	0.02573	210.47	0.03623
210.03	0.03071	210.02	0.05809	209.83	0.0186	209.87	0.02591	210.62	0.03634
210.2	0.0306	210.17	0.05811	209.98	0.0184	210.03	0.02567	210.78	0.03621
210.36	0.03067	210.33	0.05811	210.14	0.01838	210.19	0.02585	210.94	0.0363
210.52	0.0306	210.48	0.05809	210.3	0.01836	210.34	0.02552	211.09	0.03638
210.67	0.03042	210.64	0.05807	210.45	0.01867	210.5	0.02625	211.25	0.03652
210.83	0.03044	210.8	0.05768	210.61	0.01883	210.66	0.02598	211.42	0.03652
210.98	0.03027	210.95	0.05799	210.76	0.01875	210.81	0.02617	211.58	0.03646
211.14	0.03021	211.11	0.05758	210.92	0.01821	210.97	0.02608	211.74	0.03638
211.3	0.03035	211.28	0.05722	211.08	0.01836	211.12	0.02575	211.89	0.03625
211.45	0.03009	211.44	0.0566	211.23	0.01838	211.28	0.02677	212.05	0.03625
211.61	0.03011	211.59	0.05712	211.39	0.01871	211.44	0.02749	212.2	0.03632
211.77	0.03005	211.75	0.0567	211.55	0.01906	211.59	0.02749	212.36	0.0364
211.92	0.0298	211.91	0.05604	211.7	0.01913	211.75	0.0266	212.52	0.0365
212.08	0.02973	212.06	0.05581	211.86	0.0183	211.91	0.02629	212.67	0.03603
212.25	0.02971	212.22	0.05619	212.01	0.01823	212.06	0.0265	212.83	0.03584
212.41	0.02944	212.37	0.05675	212.17	0.01848	212.22	0.02656	212.99	0.03607
212.56	0.02952	212.53	0.05722	212.34	0.0185	212.39	0.0265	213.14	0.03609
212.72	0.02973	212.69	0.05751	212.5	0.01854	212.55	0.02652	213.3	0.036
212.87	0.02954	212.84	0.05747	212.66	0.01834	212.7	0.02687	213.45	0.03628
213.03	0.02969	213	0.05764	212.81	0.01804	212.86	0.0267	213.61	0.03617
213.19	0.02956	213.16	0.05809	212.97	0.01834	213.01	0.02625	213.77	0.03638
213.34	0.02959	213.33	0.05772	213.12	0.01873	213.17	0.02548	213.94	0.03611
213.5	0.02973	213.48	0.05755	213.28	0.01862	213.33	0.02604	214.09	0.03609
213.66	0.03023	213.64	0.0578	213.44	0.01854	213.48	0.02548	214.25	0.03605
213.81	0.03	213.8	0.05793	213.59	0.01821	213.64	0.02579	214.41	0.03634
213.97	0.03031	213.95	0.05799	213.75	0.01846	213.8	0.02579	214.56	0.03611
214.12	0.02977	214.11	0.05815	213.91	0.01869	213.95	0.02564	214.72	0.03621
214.3	0.02969	214.27	0.0577	214.06	0.01846	214.12	0.02585	214.87	0.03594
214.45	0.02986	214.42	0.05807	214.22	0.01832	214.28	0.02585	215.03	0.03582
214.61	0.02982	214.58	0.0582	214.37	0.01838	214.44	0.02602	215.19	0.03573
214.77	0.02992	214.73	0.05851	214.55	0.01821	214.59	0.02596	215.34	0.03592
214.92	0.02963	214.89	0.05811	214.7	0.01858	214.75	0.02554	215.5	0.03628
215.08	0.02961	215.05	0.05818	214.86	0.01869	214.91	0.02517	215.67	0.03611
215.23	0.03007	215.2	0.05849	215.01	0.01819	215.06	0.02506	215.83	0.03569
215.39	0.03019	215.36	0.05876	215.17	0.01825	215.22	0.02546	215.99	0.03605
215.55	0.02954	215.53	0.05864	215.33	0.01871	215.37	0.02565	216.14	0.03648
215.7	0.02926	215.69	0.05866	215.48	0.01896	215.53	0.02538	216.3	0.0369
215.86	0.02944	215.84	0.05888	215.64	0.01838	215.69	0.02538	216.45	0.03669
216.02	0.02959	216.02	0.05897	215.8	0.01838	215.84	0.02556	216.61	0.03669
216.17	0.03009	216.17	0.0588	215.95	0.01827	216	0.02564	216.77	0.03658
216.33	0.03035	216.33	0.05843	216.11	0.01825	216.16	0.02585	216.92	0.03658
216.5	0.03017	216.48	0.05853	216.26	0.01867	216.31	0.02585	217.08	0.03626
216.66	0.03023	216.64	0.05859	216.42	0.01885	216.47	0.02548	217.24	0.03625
216.81	0.03009	216.8	0.05816	216.59	0.0183	216.64	0.02552	217.39	0.03636
216.97	0.03021	216.95	0.05822	216.75	0.01807	216.8	0.02571	217.55	0.03665
217.12	0.03063	217.11	0.0583	216.91	0.01848	216.95	0.02521	217.7	0.0364
217.28	0.03033	217.27	0.05845	217.06	0.01848	217.11	0.0255	217.86	0.03656
217.44	0.0305	217.42	0.05832	217.22	0.01846	217.26	0.02556	218.02	0.03642
217.59	0.02996	217.58	0.05841	217.37	0.01811	217.42	0.02529	218.19	0.03636
217.75	0.03048	217.73	0.05847	217.53	0.01794	217.58	0.02573	218.34	0.036
217.91	0.03118	217.89	0.05837	217.69	0.01804	217.73	0.02581	218.5	0.03613
218.06	0.03139	218.06	0.05839	217.84	0.01844	217.89	0.02602	218.66	0.03644
218.22	0.03033	218.22	0.05853	218	0.01873	218.05	0.02602	218.81	0.03619
218.37	0.0305	218.37	0.05795	218.16	0.0184	218.2	0.02585	218.97	0.03615
218.55	0.03025	218.53	0.05776	218.31	0.01825	218.37	0.02575	219.12	0.0363
218.7	0.03083	218.69	0.05778	218.47	0.01827	218.53	0.02581	219.28	0.03658
218.86	0.03193	218.84	0.05785	218.62	0.01842	218.69	0.0261	219.44	0.03671
219.02	0.03137	219	0.0578	218.8	0.01867	218.84	0.02587	219.59	0.03669
219.17	0.03152	219.16	0.05793	218.95	0.01836	219	0.02575	219.75	0.03644
219.33	0.03135	219.31	0.0582	219.11	0.01827	219.16	0.02598	219.92	0.03656
219.48	0.0312	219.47	0.05836	219.26	0.01815	219.31	0.02562	220.08	0.03656
219.64	0.03173	219.62	0.05837	219.42	0.01842	219.47	0.02558	220.24	0.03652
219.8	0.03108	219.78	0.05836	219.58	0.01877	219.62	0.025	220.39	0.03654
219.95	0.03075	219.94	0.05809	219.73	0.01842	219.78	0.02498	220.55	0.03667
220.11	0.03052	220.09	0.05816	219.89	0.01804	219.94	0.02565	220.7	0.03663
220.27	0.03035	220.25	0.05813	220.05	0.01819	220.09	0.02534	220.86	0.0365
220.42	0.03023	220.41	0.05816	220.2	0.0185	220.25	0.0251	221.02	0.03667
220.58	0.03033	220.58	0.05816	220.36	0.0185	220.41	0.02565	221.17	0.03669
220.75	0.03021	220.73	0.05832	220.51	0.01813	220.56	0.02573	221.33	0.03665
220.91	0.03005	220.89	0.05861	220.67	0.01763	220.72	0.0254	221.49	0.03652
221.06	0.0305	221.05	0.05837	220.84	0.01805	220.89	0.02538	221.64	0.03628
221.22	0.03017	221.2	0.05832	221	0.01854	221.05	0.02529	221.8	0.0359
221.37	0.03005	221.36	0.0583	221.16	0.01885	221.2	0.02496	221.95	0.03615
221.53	0.03015	221.52	0.05805	221.31	0.01821	221.36	0.02504	222.11	0.0358
221.69	0.02982	221.67	0.05816	221.47	0.01804	221.51	0.025	222.27	0.03607
221.84	0.03031	221.83	0.05815	221.62	0.01792	221.67	0.02544	222.44	0.03652
222	0.03021	221.98	0.05805	221.78	0.01834	221.83	0.02517	222.59	0.03648
222.16	0.02998	222.14	0.05813	221.94	0.0185	221.98	0.02517	222.75	0.03702
222.31	0.02959	222.3	0.05826	222.09	0.01813	222.14	0.02483	222.91	0.03685
222.47	0.03052	222.45	0.05809	222.25	0.01838	222.3	0.02515	223.06	0.03679
222.62	0.03058	222.61	0.05839	222.41	0.01925	222.45	0.02525	223.22	0.03702
222.8	0.02998	222.78	0.05837	222.56	0.01937	222.62	0.02508	223.37	0.03673
222.95	0.02975	222.94	0.05841	222.72	0.01923	222.78	0.0254	223.53	0.03665
223.11	0.02967	223.09	0.05805	222.87	0.01892	222.94	0.02533	223.69	0.03654
223.27	0.02979	223.25	0.05818	223.05	0.01821	223.09	0.02521	223.84	0.03621
223.42	0.0305	223.41	0.05778	223.2	0.0183	223.25	0.02465	224	0.03656
223.58	0.03009	223.56	0.05747	223.36	0.01887	223.41	0.02446	224.17	0.03673
223.73	0.03063	223.72	0.05762	223.51	0.01896	223.56	0.02473	224.33	0.03665
223.89	0.03077	223.87	0.05782	223.67	0.01858	223.72	0.02488	224.49	0.03698
224.05	0.03088	224.03	0.05789	223.83	0.01805	223.87	0.02508	224.64	0.03656
224.2	0.03081	224.19	0.05799	223.98	0.01807	224.03	0.02508	224.8	0.03642
224.36	0.03044	224.34	0.05795	224.14	0.01836	224.19	0.02486	224.95	0.03632
224.52	0.03037	224.5	0.05766	224.3	0.0185	224.34	0.0251	225.11	0.03673
224.67	0.02996	224.66	0.05776	224.45	0.01875	224.5	0.02492	225.27	0.03685
224.83	0.03004	224.83	0.05791	224.61	0.01848	224.66	0.02463	225.42	0.03727
225	0.03048	224.98	0.05826	224.76	0.01846	224.81	0.02479	225.58	0.03683
225.16	0.03015	225.14	0.05801	224.98	0.01854	224.97	0.02486	225.74	0.037
225.31	0.03004	225.3	0.05774	225.14	0.01846	225.14	0.02496	225.89	0.03737
225.47	0.03035	225.45	0.05764	225.3	0.01804	225.3	0.02486	226.05	0.03727
225.62	0.03067	225.61	0.05724	225.45	0.01805	225.45	0.0251	226.2	0.03752
225.78	0.03077	225.77	0.05718	225.61	0.01819	225.61	0.02521	226.36	0.03717
225.94	0.03088	225.92	0.05724	225.76	0.01819	225.76	0.0251	226.52	0.03702
226.09	0.0306	226.08	0.05733	225.92	0.01838	225.92	0.02514	226.69	0.037
226.25	0.03054	226.23	0.0571	226.08	0.01825	226.08	0.02529	226.84	0.03735
226.41	0.03046	226.39	0.05718	226.23	0.01809	226.23	0.02506	227	0.03717
226.56	0.0306	226.55	0.05733	226.39	0.01807	226.39	0.02506	227.16	0.03723
226.72	0.0306	226.7	0.05753	226.55	0.01815	226.55	0.02486	227.31	0.03721
226.87	0.03063	226.86	0.05735	226.72	0.01834	226.7	0.02519	227.47	0.03709
227.05	0.03094	227.03	0.05753	226.87	0.0183	226.87	0.02523	227.62	0.03708
227.2	0.03083	227.19	0.05741	227.03	0.01769	227.03	0.02514	227.78	0.03681
227.36	0.03058	227.34	0.05735	227.19	0.01792	227.19	0.02506	227.94	0.03679
227.52	0.03025	227.5	0.05741	227.34	0.01836	227.34	0.02538	228.09	0.03702
227.67	0.03094	227.66	0.05733	227.5	0.01848	227.5	0.02492	228.25	0.03686
227.83	0.03118	227.81	0.05751	227.66	0.01838	227.66	0.0251	228.42	0.03632
227.98	0.03118	227.97	0.05743	227.81	0.01802	227.81	0.02517	228.58	0.03661
228.14	0.03088	228.12	0.05749	227.97	0.01802	227.97	0.02473	228.74	0.03679
228.3	0.03017	228.28	0.0573	228.12	0.01815	228.12	0.02508	228.89	0.03685
228.45	0.02994	228.44	0.05726	228.28	0.01825	228.28	0.02506	229.05	0.03679
228.61	0.03005	228.59	0.0573	228.44	0.01807	228.44	0.02429	229.2	0.03677
228.77	0.03	228.75	0.05733	228.59	0.01779	228.59	0.02459	229.36	0.03702
228.92	0.03013	228.91	0.0572	228.75	0.01782	228.75	0.02488	229.52	0.03708
229.08	0.0304	229.08	0.05755	228.92	0.01794	228.91	0.02436	229.67	0.037
229.25	0.03058	229.23	0.05753	229.08	0.01819	229.06	0.02423	229.83	0.03692
229.41	0.03063	229.39	0.05751	229.23	0.01815	229.22	0.02432	229.99	0.03702
229.56	0.03025	229.55	0.05755	229.39	0.01792	229.39	0.02453	230.14	0.03686
229.72	0.03017	229.7	0.05755	229.55	0.0178	229.55	0.02455	230.3	0.03709
229.87	0.0305	229.86	0.05778	229.7	0.01802	229.7	0.02442	230.45	0.03686
230.03	0.0306	230.02	0.05753	229.86	0.01815	229.86	0.02452	230.61	0.03696
230.19	0.03102	230.17	0.05747	230.01	0.018	230.01	0.02527	230.77	0.03681
230.34	0.03116	230.33	0.05758	230.17	0.01769	230.17	0.02565	230.94	0.03698
230.5	0.03073	230.48	0.05751	230.33	0.0174	230.33	0.02565	231.09	0.03681
230.66	0.0304	230.64	0.05768	230.48	0.01767	230.48	0.02548	231.25	0.0363
230.81	0.03073	230.8	0.05772	230.64	0.01819	230.64	0.02517	231.41	0.03638
230.97	0.03148	230.95	0.05743	230.8	0.01792	230.8	0.02479	231.56	0.03652
231.12	0.03181	231.11	0.05739	230.97	0.01763	230.95	0.02467	231.72	0.0365
231.3	0.03156	231.28	0.05741	231.12	0.01734	231.12	0.02473	231.87	0.03632
231.45	0.03197	231.44	0.05737	231.28	0.0178	231.28	0.02436	232.03	0.03634
231.61	0.03183	231.59	0.05735	231.44	0.01804	231.44	0.02434	232.19	0.03648
231.77	0.03137	231.75	0.05737	231.59	0.01813	231.59	0.02496	232.34	0.03654
231.92	0.03141	231.91	0.05747	231.75	0.01784	231.75	0.02475	232.5	0.0364
232.08	0.03133	232.06	0.05749	231.91	0.01802	231.91	0.02475	232.67	0.03654
232.23	0.03077	232.22	0.05726	232.06	0.0183	232.06	0.02455	232.83	0.03638
232.39	0.03139	232.37	0.05699	232.22	0.01836	232.22	0.02442	232.99	0.03638
232.55	0.03168	232.53	0.05706	232.37	0.0184	232.37	0.02434	233.14	0.03648
232.7	0.03175	232.69	0.05739	232.53	0.01763	232.53	0.02432	233.3	0.03656
232.86	0.03071	232.84	0.05741	232.69	0.01765	232.69	0.02453	233.45	0.03625
233.02	0.03114	233	0.0578	232.84	0.0179	232.84	0.02471	233.61	0.03569
233.17	0.03114	233.16	0.05755	233	0.01832	233	0.02498	233.77	0.03528
233.33	0.0316	233.33	0.05758	233.17	0.01846	233.16	0.02463	233.92	0.03571
233.5	0.03133	233.48	0.05799	233.33	0.01802	233.31	0.02453	234.08	0.036
233.66	0.03123	233.64	0.05818	233.48	0.01775	233.47	0.025	234.24	0.03638
233.81	0.0312	233.8	0.05805	233.64	0.01786	233.64	0.02471	234.39	0.03661
233.97	0.0311	233.95	0.05783	233.8	0.0183	233.8	0.02452	234.55	0.0364
234.12	0.0309	234.11	0.05787	233.95	0.01836	233.95	0.02477	234.7	0.0369
234.28	0.03067	234.27	0.05785	234.11	0.01755	234.11	0.02419	234.86	0.03667
234.44	0.03081	234.42	0.05768	234.26	0.01748	234.26	0.02446	235.02	0.03667
234.59	0.03121	234.58	0.05743	234.42	0.0179	234.42	0.02467	235.19	0.03661
234.75	0.0311	234.73	0.05764	234.58	0.01852	234.58	0.02473	235.34	0.03654
234.91	0.03092	234.89	0.0578	234.73	0.01848	234.73	0.02515	235.5	0.03685
235.06	0.03112	235.05	0.0578	234.89	0.01798	234.89	0.02479	235.66	0.03646
235.22	0.0315	235.2	0.05755	235.05	0.01771	235.05	0.02455	235.81	0.03602
235.37	0.03127	235.36	0.05801	235.22	0.01823	235.2	0.0244	235.97	0.03571
235.55	0.03123	235.53	0.05791	235.37	0.01863	235.37	0.0249	236.12	0.03571
235.7	0.03139	235.69	0.05782	235.53	0.0184	235.53	0.02457	236.28	0.03557
235.86	0.03135	235.84	0.0577	235.69	0.01798	235.69	0.02536	236.44	0.03586
236.02	0.0311	236	0.05735	235.84	0.01773	235.84	0.02573	236.59	0.03586
236.17	0.03085	236.16	0.05691	236	0.0178	236	0.0255	236.77	0.03613
236.33	0.03071	236.31	0.057	236.16	0.01805	236.16	0.02483	236.92	0.03646
236.48	0.03038	236.47	0.057	236.31	0.01819	236.31	0.02471	237.08	0.03602
236.64	0.03025	236.62	0.05699	236.47	0.01788	236.47	0.02534	237.24	0.03619
236.8	0.03005	236.78	0.0573	236.62	0.01746	236.62	0.02567	237.39	0.03621
236.95	0.03071	236.94	0.05747	236.78	0.01749	236.78	0.02581	237.55	0.03634
237.11	0.03085	237.09	0.05756	236.94	0.01815	236.94	0.02552	237.7	0.03609
237.27	0.0309	237.25	0.05739	237.09	0.01804	237.09	0.02515	237.86	0.03617
237.42	0.03052	237.41	0.05772	237.25	0.01761	237.25	0.02571	238.02	0.03625
237.58	0.03081	237.58	0.05789	237.42	0.01771	237.41	0.02527	238.17	0.0364
237.75	0.03096	237.73	0.05749	237.58	0.01794	237.56	0.02486	238.34	0.0364
237.91	0.0309	237.89	0.05733	237.73	0.01825	237.72	0.02554	238.5	0.03656
238.06	0.03046	238.05	0.05687	237.89	0.01836	237.89	0.02508	238.66	0.03654
238.22	0.03044	238.2	0.05673	238.05	0.01775	238.05	0.02461	238.81	0.03659
238.37	0.03088	238.36	0.05621	238.2	0.01779	238.2	0.02448	238.97	0.03677
238.53	0.03081	238.52	0.05664	238.36	0.01819	238.36	0.02444	239.12	0.03671
238.69	0.03075	238.67	0.05664	238.51	0.0183	238.51	0.0245	239.28	0.03686
238.84	0.03027	238.83	0.0566	238.67	0.01836	238.67	0.02434	239.44	0.03656
239	0.03038	238.98	0.05666	238.83	0.01794	238.83	0.02438	239.59	0.03671
239.16	0.03079	239.14	0.057	238.98	0.01759	238.98	0.02415	239.75	0.03661
239.31	0.03112	239.3	0.0571	239.14	0.01769	239.14	0.02419	239.92	0.03626
239.47	0.03104	239.47	0.05718	239.3	0.01823	239.3	0.02434	240.08	0.03636
239.62	0.03087	239.62	0.0578	239.47	0.01827	239.45	0.0244	240.24	0.03623
239.8	0.031	239.78	0.05728	239.62	0.018	239.62	0.02446	240.39	0.03621
239.95	0.031	239.94	0.05652	239.78	0.01751	239.78	0.02419	240.55	0.0364
240.11	0.0311	240.09	0.05649	239.94	0.01779	239.94	0.02403	240.7	0.03623
240.27	0.03166	240.25	0.05649	240.09	0.01794	240.09	0.02429	240.86	0.03626
240.42	0.03202	240.41	0.05683	240.25	0.01819	240.25	0.02498	241.02	0.03617
240.58	0.03168	240.56	0.0571	240.41	0.01786	240.41	0.02471	241.17	0.03598
240.73	0.03179	240.72	0.05712	240.56	0.01773	240.56	0.02423	241.34	0.03582
240.89	0.0315	240.87	0.05726	240.72	0.01802	240.72	0.02442	241.5	0.0358
241.05	0.03133	241.03	0.05733	240.87	0.01811	240.87	0.02405	241.66	0.03613
241.22	0.03135	241.19	0.05722	241.03	0.01788	241.03	0.02446	241.81	0.03592
241.37	0.03106	241.36	0.05745	241.2	0.01763	241.19	0.02455	241.97	0.03592
241.53	0.03096	241.52	0.05712	241.36	0.01748	241.34	0.02423	242.12	0.03602
241.69	0.03094	241.67	0.05758	241.51	0.01773	241.5	0.02455	242.28	0.03615
241.84	0.03133	241.83	0.05743	241.67	0.01813	241.66	0.02411	242.45	0.03561
242	0.03164	241.98	0.05712	241.83	0.01819	241.81	0.024	242.61	0.03613
242.17	0.03148	242.14	0.05733	241.98	0.01779	241.98	0.02394	242.77	0.03567
242.33	0.03162	242.3	0.05756	242.14	0.01777	242.14	0.02429	242.92	0.03559
242.48	0.03114	242.45	0.05783	242.3	0.01796	242.3	0.02461	243.08	0.03544
242.64	0.0309	242.62	0.05785	242.45	0.01815	242.45	0.02455	243.24	0.03549
242.8	0.03135	242.78	0.0577	242.61	0.01798	242.61	0.02455	243.39	0.03571
242.95	0.03162	242.94	0.05787	242.76	0.01757	242.76	0.02461	243.55	0.0358
243.11	0.03162	243.09	0.05813	242.92	0.01765	242.92	0.02382	243.72	0.036
243.27	0.03156	243.25	0.05793	243.09	0.0179	243.08	0.02386	243.87	0.03586
243.42	0.03142	243.41	0.05826	243.25	0.01827	243.25	0.02432	244.03	0.03549
243.59	0.03131	243.56	0.05828	243.41	0.01846	243.41	0.02432	244.19	0.03532
243.75	0.03106	243.73	0.05837	243.56	0.018	243.56	0.02411	244.34	0.03559
243.91	0.03142	243.89	0.0582	243.72	0.01821	243.72	0.0239	244.5	0.03575
244.06	0.03187	244.05	0.05818	243.87	0.0179	243.87	0.02411	244.67	0.03577
244.22	0.03118	244.2	0.05837	244.03	0.01805	244.03	0.0238	244.83	0.0359
244.37	0.03106	244.36	0.0583	244.2	0.0178	244.19	0.024	244.99	0.03598
244.55	0.03131	244.52	0.05837	244.36	0.01753	244.34	0.02434	245.14	0.03584
244.7	0.03131	244.67	0.0582	244.51	0.0174	244.51	0.02429	245.3	0.03557
244.86	0.03144	244.84	0.05813	244.67	0.01767	244.67	0.0244	245.45	0.03573
245.02	0.03144	245	0.05813	244.83	0.01804	244.83	0.0244	245.61	0.03565
245.17	0.03088	245.16	0.05813	244.98	0.0178	244.98	0.0245	245.77	0.03575
245.33	0.03079	245.31	0.05809	245.14	0.01742	245.14	0.02419	245.94	0.03559
245.48	0.0309	245.47	0.0578	245.3	0.01724	245.3	0.02407	246.09	0.03571
245.64	0.03092	245.62	0.05776	245.47	0.01724	245.45	0.02384	246.25	0.03575
245.8	0.03106	245.78	0.05818	245.62	0.01749	245.62	0.0239	246.41	0.03609
245.97	0.03094	245.94	0.05813	245.78	0.01744	245.78	0.0244	246.56	0.03575
246.12	0.031	246.11	0.05809	245.94	0.01736	245.94	0.02413	246.72	0.03584
246.28	0.0311	246.27	0.05816	246.09	0.01713	246.09	0.02403	246.87	0.03582
246.44	0.03133	246.42	0.05807	246.25	0.01717	246.25	0.024	247.05	0.03561
246.59	0.03139	246.58	0.05809	246.42	0.01763	246.41	0.02401	247.2	0.03517
246.75	0.03158	246.73	0.05859	246.58	0.01763	246.56	0.02342	247.36	0.03528
246.92	0.03158	246.89	0.05845	246.73	0.01715	246.72	0.02367	247.52	0.0359
247.08	0.03152	247.06	0.05813	246.89	0.01721	246.89	0.02363	247.67	0.0359
247.23	0.03131	247.22	0.05832	247.05	0.01734	247.05	0.0232	247.83	0.03577
247.39	0.03114	247.37	0.05805	247.2	0.01765	247.2	0.02355	247.99	0.03592
247.55	0.03106	247.53	0.05813	247.36	0.01746	247.36	0.02348	248.14	0.03588
247.7	0.0309	247.69	0.05811	247.51	0.01723	247.51	0.02355	248.31	0.03567
247.86	0.03088	247.84	0.0571	247.69	0.01726	247.67	0.02322	248.47	0.03563
248.02	0.03063	248	0.05706	247.84	0.01759	247.84	0.02338	248.62	0.0359
248.17	0.03067	248.16	0.0576	248	0.01779	248	0.02348	248.78	0.03584
248.34	0.03079	248.33	0.05782	248.16	0.01744	248.16	0.02394	248.94	0.03605
248.5	0.031	248.48	0.05818	248.31	0.01736	248.31	0.02429	249.09	0.03603
248.66	0.0311	248.64	0.05818	248.47	0.0173	248.47	0.02407	249.25	0.03592
248.81	0.03069	248.8	0.05837	248.62	0.01744	248.62	0.0239	249.42	0.03586
248.97	0.03058	248.95	0.05815	248.8	0.01777	248.78	0.02431	249.58	0.03571
249.12	0.03052	249.11	0.0582	248.95	0.01738	248.94	0.02363	249.74	0.03603
249.3	0.0304	249.27	0.05837	249.11	0.01719	249.11	0.02334	249.89	0.03584
249.45	0.03092	249.44	0.05755	249.26	0.01698	249.26	0.02396	250.05	0.03613
249.61	0.03094	249.59	0.05755	249.42	0.01767	249.42	0.02378	250.2	0.03617
249.77	0.03094	249.75	0.05778	249.58	0.01811	249.58	0.02411	250.36	0.03617
249.92	0.03118	249.91	0.05753	249.73	0.01769	249.73	0.02401	250.52	0.036
250.08	0.03162	250.06	0.05764	249.91	0.01694	249.89	0.02398	250.69	0.036
250.23	0.03144	250.22	0.05772	250.06	0.01719	250.05	0.02369	250.84	0.03609
250.39	0.03139	250.37	0.05785	250.22	0.01757	250.22	0.02378	251	0.03609
250.55	0.03139	250.53	0.05764	250.37	0.01773	250.37	0.02374	251.16	0.03628
250.72	0.0311	250.7	0.05753	250.53	0.01728	250.53	0.02372	251.31	0.03609
250.87	0.03083	250.86	0.05751	250.69	0.01721	250.69	0.02432	251.47	0.03615
251.03	0.03127	251.02	0.05745	250.84	0.01734	250.84	0.02403	251.64	0.03611
251.19	0.03146	251.17	0.0572	251	0.01746	251	0.02448	251.8	0.03648
251.34	0.03144	251.33	0.0566	251.17	0.01809	251.16	0.02432	251.95	0.03615
251.5	0.03166	251.48	0.05672	251.33	0.01794	251.33	0.02444	252.11	0.03625
251.67	0.0315	251.64	0.05733	251.48	0.01715	251.48	0.02473	252.27	0.03603
251.83	0.0309	251.81	0.05745	251.64	0.01723	251.64	0.02473	252.42	0.03607
251.98	0.03121	251.97	0.05739	251.8	0.01796	251.8	0.02502	252.58	0.03598
252.14	0.03158	252.12	0.05728	251.95	0.01802	251.95	0.02469	252.74	0.03609
252.3	0.03156	252.28	0.05699	252.11	0.01757	252.11	0.02488	252.91	0.03607
252.45	0.03197	252.44	0.05733	252.28	0.01707	252.26	0.02484	253.06	0.03623
252.61	0.03187	252.59	0.0576	252.44	0.01736	252.42	0.02446	253.22	0.03621
252.77	0.03168	252.75	0.05768	252.59	0.01769	252.59	0.02459	253.37	0.03619
252.92	0.03137	252.91	0.05795	252.75	0.01794	252.75	0.02459	253.53	0.0363
253.09	0.03127	253.08	0.05782	252.91	0.01763	252.91	0.02444	253.69	0.036
253.25	0.03112	253.23	0.05815	253.06	0.0174	253.06	0.02403	253.84	0.036
253.41	0.03154	253.39	0.05843	253.22	0.01748	253.22	0.02442	254.02	0.03615
253.56	0.03158	253.55	0.05843	253.37	0.01775	253.37	0.02434	254.17	0.03602
253.72	0.03131	253.7	0.05828	253.55	0.01744	253.55	0.02398	254.33	0.03613
253.87	0.03135	253.86	0.05801	253.7	0.01763	253.7	0.02459	254.49	0.03634
254.03	0.03087	254.03	0.05828	253.86	0.01788	253.86	0.0244	254.64	0.03658
254.2	0.0309	254.19	0.05834	254.01	0.01823	254.01	0.02411	254.8	0.03656
254.36	0.03106	254.34	0.05815	254.17	0.01829	254.17	0.02436	254.95	0.03667
254.52	0.03125	254.5	0.05803	254.33	0.01815	254.33	0.02431	255.12	0.03665
254.67	0.0312	254.66	0.05807	254.48	0.01784	254.48	0.02409	255.28	0.03654
254.83	0.03085	254.81	0.05816	254.66	0.01757	254.64	0.02434	255.44	0.03648
254.98	0.03048	254.97	0.05836	254.81	0.01773	254.8	0.02419	255.59	0.03638
255.14	0.03083	255.12	0.05795	254.97	0.01794	254.97	0.02444	255.75	0.03534
255.3	0.03052	255.3	0.0577	255.12	0.0179	255.12	0.02423	255.91	0.03461
255.47	0.0309	255.45	0.05778	255.28	0.01732	255.28	0.0245	256.06	0.0347
255.62	0.0311	255.61	0.05755	255.44	0.01726	255.44	0.02434	256.22	0.03515
255.78	0.03081	255.77	0.05741	255.59	0.01761	255.59	0.02398	256.39	0.03551
255.94	0.03087	255.92	0.05766	255.75	0.0179	255.75	0.02438	256.55	0.03573
256.09	0.03071	256.08	0.0576	255.92	0.01751	255.92	0.02409	256.7	0.036
256.25	0.03083	256.23	0.05755	256.08	0.01732	256.08	0.02398	256.86	0.03621
256.41	0.03044	256.41	0.0577	256.23	0.01742	256.23	0.02398	257.02	0.03619
256.58	0.03023	256.56	0.05747	256.39	0.01765	256.39	0.02378	257.17	0.03623
256.73	0.03046	256.72	0.05745	256.55	0.01798	256.55	0.0238	257.34	0.03636
256.89	0.03075	256.87	0.05745	256.7	0.01732	256.7	0.02398	257.5	0.03603
257.05	0.03044	257.03	0.05766	256.86	0.01738	256.86	0.02382	257.66	0.03619
257.2	0.0311	257.19	0.05747	257.03	0.01698	257.01	0.02392	257.81	0.03607
257.36	0.03106	257.34	0.05739	257.19	0.0174	257.17	0.02401	257.97	0.03592
257.52	0.03094	257.52	0.05776	257.34	0.01779	257.34	0.02417	258.12	0.03596
257.67	0.03087	257.67	0.05774	257.5	0.01757	257.5	0.0237	258.28	0.03594
257.84	0.03092	257.83	0.05764	257.66	0.01724	257.66	0.02407	258.44	0.03596
258	0.03061	257.98	0.05755	257.81	0.01748	257.81	0.0235	258.59	0.03577
258.16	0.03044	258.14	0.05764	257.97	0.0179	257.97	0.02363	258.77	0.03586
258.31	0.0305	258.3	0.05745	258.12	0.01784	258.12	0.02396	258.92	0.03582
258.47	0.03079	258.45	0.05758	258.3	0.01742	258.3	0.02376	259.08	0.03607
258.62	0.031	258.61	0.05758	258.45	0.01757	258.45	0.02394	259.24	0.03605
258.8	0.03085	258.78	0.0578	258.61	0.01771	258.61	0.02392	259.39	0.03607
258.95	0.03079	258.94	0.05795	258.76	0.01807	258.76	0.02367	259.55	0.03594
259.11	0.03096	259.09	0.05778	258.92	0.01821	258.92	0.02392	259.72	0.03588
259.27	0.03081	259.25	0.0577	259.08	0.01767	259.08	0.02407	259.87	0.03611
259.42	0.03063	259.41	0.05803	259.23	0.01719	259.23	0.02434	260.03	0.03602
259.58	0.03054	259.56	0.05764	259.41	0.01761	259.39	0.02467	260.19	0.0363
259.73	0.03017	259.72	0.05772	259.56	0.01804	259.55	0.02463	260.34	0.03613
259.89	0.03013	259.89	0.0572	259.72	0.01751	259.72	0.02419	260.5	0.0365
260.05	0.03019	260.05	0.05718	259.87	0.01742	259.87	0.02398	260.66	0.03619
260.22	0.0304	260.2	0.05718	260.03	0.01723	260.03	0.02405	260.81	0.03592
260.37	0.03038	260.36	0.0572	260.19	0.01744	260.19	0.02423	260.97	0.03551
260.53	0.03025	260.52	0.05735	260.34	0.01809	260.34	0.02444	261.14	0.03547
260.69	0.0305	260.67	0.05758	260.5	0.01804	260.5	0.02434	261.3	0.03553
260.84	0.03077	260.83	0.0578	260.67	0.01777	260.67	0.02432	261.45	0.03577
261	0.03081	260.98	0.05764	260.83	0.01775	260.83	0.025	261.61	0.03582
261.17	0.03079	261.16	0.05753	260.98	0.01802	260.98	0.02552	261.77	0.03605
261.33	0.03033	261.31	0.0577	261.14	0.01825	261.14	0.02542	261.92	0.03611
261.48	0.03031	261.47	0.05743	261.3	0.01813	261.3	0.02457	262.09	0.03638
261.64	0.03	261.62	0.05732	261.45	0.01782	261.45	0.02394	262.25	0.03681
261.8	0.02977	261.78	0.05751	261.61	0.01821	261.61	0.02405	262.41	0.03677
261.95	0.03054	261.94	0.05768	261.78	0.01844	261.76	0.02425	262.56	0.03663
262.11	0.03056	262.09	0.05712	261.94	0.01867	261.92	0.02413	262.72	0.03638
262.27	0.03023	262.27	0.05708	262.09	0.01792	262.09	0.02411	262.87	0.03669
262.42	0.02977	262.42	0.05699	262.25	0.01767	262.25	0.02398	263.03	0.03673
262.59	0.02992	262.58	0.05708	262.41	0.01804	262.41	0.02376	263.19	0.03661
262.75	0.03021	262.73	0.05739	262.56	0.01809	262.56	0.02372	263.34	0.03709
262.91	0.03035	262.89	0.05772	262.72	0.01805	262.72	0.02415	263.52	0.03721
263.06	0.03017	263.05	0.05774	262.87	0.01809	262.87	0.02403	263.67	0.03746
263.22	0.03027	263.2	0.05785	263.05	0.01767	263.05	0.02421	263.83	0.03715
263.37	0.02982	263.37	0.05783	263.2	0.0179	263.2	0.02417	263.99	0.03721
263.55	0.0298	263.53	0.05764	263.36	0.0184	263.36	0.02419	264.14	0.03658
263.7	0.02956	263.69	0.05789	263.51	0.01813	263.51	0.02396	264.3	0.03729
263.86	0.0298	263.84	0.05768	263.67	0.01753	263.67	0.0245	264.47	0.03719
264.02	0.02984	264	0.05735	263.83	0.01771	263.83	0.02431	264.62	0.03767
264.17	0.03019	264.16	0.05739	263.98	0.01792	263.98	0.024	264.78	0.03748
264.33	0.03009	264.31	0.0572	264.16	0.01805	264.14	0.02376	264.94	0.03742
264.48	0.03029	264.48	0.05728	264.31	0.01779	264.3	0.02357	265.09	0.03752
264.64	0.03031	264.64	0.05766	264.47	0.01749	264.47	0.02332	265.25	0.03744
264.8	0.03004	264.8	0.05776	264.62	0.01753	264.62	0.02353	265.41	0.03731
264.97	0.03031	264.95	0.05772	264.78	0.01804	264.78	0.02355	265.56	0.03771
265.12	0.03067	265.11	0.05737	264.94	0.01846	264.94	0.02394	265.72	0.03777
265.28	0.03056	265.27	0.05751	265.09	0.01798	265.09	0.02436	265.89	0.03785
265.44	0.03025	265.42	0.05789	265.25	0.01759	265.25	0.02425	266.05	0.03814
265.59	0.03029	265.59	0.05801	265.42	0.01794	265.42	0.02463	266.2	0.03771
265.75	0.03054	265.75	0.05758	265.58	0.0184	265.58	0.02446	266.36	0.038
265.92	0.03038	265.91	0.05735	265.73	0.01805	265.73	0.02457	266.52	0.03794
266.08	0.03056	266.06	0.05733	265.89	0.01794	265.89	0.02461	266.67	0.03787
266.23	0.02992	266.22	0.0572	266.05	0.0179	266.05	0.0244	266.84	0.03773
266.39	0.0299	266.37	0.05714	266.2	0.01809	266.2	0.02403	267	0.03777
266.55	0.02996	266.53	0.05739	266.36	0.01858	266.36	0.02394	267.16	0.0382
266.7	0.03011	266.7	0.05739	266.53	0.01836	266.51	0.02431	267.31	0.0375
266.86	0.02996	266.86	0.05751	266.69	0.01784	266.67	0.02382	267.47	0.03777
267.03	0.03023	267.02	0.05753	266.84	0.01804	266.84	0.02417	267.62	0.03794
267.19	0.03075	267.17	0.05739	267	0.01798	267	0.02407	267.78	0.03833
267.34	0.03027	267.33	0.05704	267.16	0.01834	267.16	0.02361	267.95	0.03839
267.5	0.02992	267.48	0.05718	267.31	0.01817	267.31	0.0237	268.11	0.03831
267.66	0.03019	267.64	0.05758	267.47	0.01765	267.47	0.02419	268.27	0.03835
267.81	0.03025	267.81	0.05745	267.62	0.01792	267.62	0.02419	268.42	0.03843
267.97	0.03019	267.97	0.05732	267.8	0.01879	267.8	0.02396	268.58	0.03841
268.12	0.02988	268.12	0.05739	267.95	0.01858	267.95	0.0239	268.74	0.03816
268.3	0.03002	268.28	0.05716	268.11	0.0179	268.11	0.02382	268.89	0.03847
268.45	0.03005	268.44	0.05741	268.26	0.01786	268.26	0.024	269.05	0.03831
268.61	0.02984	268.59	0.05739	268.42	0.01815	268.42	0.02378	269.22	0.03848
268.77	0.02988	268.75	0.05732	268.58	0.0185	268.58	0.02411	269.37	0.0382
268.92	0.03023	268.91	0.05732	268.73	0.01823	268.73	0.0239	269.53	0.03835
269.08	0.0306	269.08	0.05716	268.91	0.01788	268.89	0.02359	269.69	0.03833
269.25	0.03005	269.23	0.05704	269.06	0.01767	269.05	0.02415	269.84	0.03798
269.41	0.02984	269.39	0.05722	269.22	0.01792	269.22	0.02413	270	0.03588
269.56	0.02994	269.55	0.0577	269.37	0.01821	269.37	0.02409	270.17	0.03626
269.72	0.03005	269.7	0.05789	269.53	0.01821	269.53	0.02386	270.33	0.03669
269.87	0.03002	269.86	0.05809	269.69	0.01759	269.69	0.02403	270.49	0.03671
270.03	0.0305	270.03	0.05805	269.84	0.01802	269.84	0.02409	270.64	0.03654
270.19	0.03052	270.19	0.05778	270	0.01863	270	0.0239	270.8	0.03685
270.34	0.03029	270.34	0.05789	270.17	0.01848	270.17	0.02394	270.97	0.03727
270.52	0.03038	270.5	0.05815	270.33	0.01815	270.33	0.02382	271.12	0.03719
270.67	0.03038	270.66	0.05811	270.48	0.01782	270.48	0.02413	271.28	0.03733
270.83	0.03009	270.81	0.05803	270.64	0.01777	270.64	0.02415	271.44	0.0375
270.98	0.03027	270.97	0.05805	270.8	0.01856	270.8	0.02444	271.59	0.03781
271.14	0.03052	271.12	0.05785	270.95	0.01823	270.95	0.02475	271.75	0.03792
271.31	0.03025	271.3	0.05799	271.11	0.01763	271.11	0.02457	271.92	0.03783
271.47	0.03027	271.45	0.05799	271.28	0.01786	271.26	0.02448	272.08	0.03804
271.62	0.03031	271.61	0.05789	271.44	0.01802	271.42	0.0249	272.24	0.03804
271.78	0.03015	271.77	0.05801	271.59	0.01802	271.59	0.02533	272.39	0.03818
271.94	0.03029	271.92	0.05826	271.75	0.01775	271.75	0.02542	272.55	0.03794
272.09	0.03052	272.08	0.05807	271.91	0.01746	271.91	0.02461	272.72	0.03808
272.27	0.03048	272.23	0.05803	272.06	0.0178	272.06	0.02455	272.87	0.03804
272.42	0.03035	272.41	0.05793	272.22	0.01817	272.22	0.02421	273.03	0.03825
272.58	0.03023	272.56	0.05847	272.37	0.0183	272.37	0.02413	273.19	0.03818
272.73	0.03044	272.72	0.05818	272.55	0.01784	272.55	0.02423	273.34	0.03871
272.89	0.03069	272.87	0.05795	272.7	0.01746	272.7	0.02471	273.5	0.03847
273.05	0.03123	273.03	0.05772	272.86	0.01782	272.86	0.02436	273.67	0.03837
273.22	0.03123	273.19	0.05793	273.01	0.01821	273.01	0.0245	273.83	0.03802
273.37	0.03125	273.36	0.05764	273.17	0.01775	273.17	0.02419	273.99	0.03806
273.53	0.03098	273.52	0.05762	273.33	0.01753	273.33	0.02455	274.14	0.03777
273.69	0.03067	273.67	0.05756	273.48	0.01751	273.48	0.02465	274.3	0.03823
273.84	0.03079	273.83	0.05772	273.66	0.01782	273.66	0.02436	274.47	0.03862
274.02	0.03088	273.98	0.05815	273.81	0.01817	273.81	0.02425	274.62	0.03854
274.17	0.03085	274.16	0.05826	273.97	0.018	273.97	0.0239	274.78	0.03856
274.33	0.03098	274.31	0.05815	274.12	0.01757	274.12	0.02369	274.94	0.03847
274.48	0.03087	274.47	0.05832	274.28	0.01773	274.28	0.02444	275.09	0.0385
274.66	0.03088	274.62	0.05847	274.44	0.01804	274.44	0.02477	275.27	0.03841
274.81	0.03098	274.78	0.05859	274.59	0.01815	274.59	0.02432	275.42	0.03866
274.97	0.0306	274.94	0.05853	274.75	0.01738	274.76	0.02446	275.58	0.03871
275.12	0.0306	275.11	0.05822	274.92	0.01713	274.92	0.02467	275.74	0.03852
275.28	0.03063	275.27	0.05828	275.08	0.01721	275.08	0.02419	275.89	0.03839
275.45	0.03058	275.42	0.05847	275.23	0.01813	275.23	0.02403	276.06	0.03835
275.61	0.03071	275.58	0.05843	275.39	0.01779	275.39	0.02409	276.22	0.03848
275.77	0.03031	275.73	0.05851	275.55	0.01749	275.55	0.02403	276.37	0.03845
275.92	0.03002	275.91	0.05857	275.7	0.01738	275.72	0.02361	276.53	0.03864
276.08	0.02996	276.06	0.05859	275.87	0.0178	275.87	0.02374	276.69	0.03868
276.25	0.03015	276.22	0.05857	276.03	0.0179	276.03	0.024	276.86	0.03895
276.41	0.03033	276.37	0.05855	276.19	0.01765	276.19	0.02384	277.02	0.03899
276.56	0.02998	276.53	0.05853	276.34	0.01721	276.34	0.02386	277.17	0.03895
276.72	0.03015	276.7	0.05807	276.5	0.01719	276.5	0.02382	277.33	0.03889
276.87	0.03027	276.86	0.05803	276.66	0.01786	276.67	0.02376	277.49	0.03887
277.05	0.03033	277.02	0.05824	276.83	0.01805	276.83	0.02386	277.66	0.03873
277.2	0.03004	277.17	0.05864	276.98	0.01765	276.98	0.0237	277.81	0.03904
277.36	0.03021	277.33	0.05878	277.14	0.01734	277.14	0.0239	277.97	0.03958
277.52	0.03019	277.48	0.05894	277.3	0.01771	277.3	0.02409	278.12	0.03958
277.67	0.03056	277.66	0.05907	277.45	0.018	277.47	0.02407	278.3	0.03949
277.84	0.03088	277.81	0.05901	277.62	0.01788	277.62	0.02417	278.45	0.03904
278	0.0309	277.97	0.05866	277.78	0.01765	277.78	0.02405	278.61	0.03839
278.16	0.03081	278.12	0.05864	277.94	0.01748	277.94	0.02429	278.77	0.03845
278.31	0.0306	278.28	0.05851	278.09	0.01755	278.09	0.02417	278.92	0.03858
278.47	0.0306	278.45	0.05855	278.25	0.01788	278.26	0.02432	279.09	0.03875
278.64	0.03096	278.61	0.05868	278.42	0.01792	278.42	0.02423	279.25	0.03887
278.8	0.03102	278.77	0.05855	278.58	0.01751	278.58	0.02446	279.41	0.03885
278.95	0.03077	278.92	0.05855	278.73	0.01763	278.73	0.02453	279.56	0.03926
279.11	0.03021	279.09	0.05849	278.89	0.018	278.91	0.02442	279.72	0.03926
279.27	0.03013	279.25	0.05843	279.05	0.01767	279.06	0.02434	279.89	0.03958
279.44	0.03025	279.41	0.05849	279.22	0.01715	279.22	0.02425	280.05	0.03956
279.59	0.03056	279.56	0.05851	279.37	0.01715	279.37	0.02448	280.2	0.03949
279.75	0.03102	279.72	0.05851	279.53	0.01779	279.53	0.02421	280.36	0.03956
279.91	0.03063	279.89	0.05849	279.69	0.01815	279.7	0.02384	280.52	0.03933
280.06	0.03042	280.05	0.05843	279.86	0.01757	279.86	0.024	280.67	0.03945
280.23	0.03031	280.2	0.05826	280.01	0.01717	280.01	0.02405	280.84	0.03939
280.39	0.03077	280.36	0.05849	280.17	0.01701	280.17	0.02432	281	0.03941
280.55	0.03042	280.52	0.05859	280.33	0.01751	280.33	0.02367	281.16	0.03933
280.7	0.03046	280.69	0.05841	280.48	0.01763	280.5	0.02369	281.31	0.03928
280.86	0.03073	280.84	0.05832	280.66	0.01726	280.66	0.02429	281.47	0.03918
281.03	0.03104	281	0.05816	280.81	0.01728	280.81	0.0245	281.64	0.03926
281.19	0.03083	281.16	0.05801	280.97	0.01742	280.97	0.02409	281.8	0.03901
281.34	0.0306	281.31	0.05793	281.12	0.01802	281.12	0.02392	281.95	0.03918
281.5	0.03071	281.48	0.05834	281.28	0.01794	281.3	0.02415	282.11	0.0396
281.66	0.03083	281.64	0.05834	281.45	0.01728	281.45	0.02421	282.27	0.03954
281.83	0.03061	281.8	0.05841	281.61	0.01744	281.61	0.02388	282.44	0.03956
281.98	0.03048	281.95	0.05853	281.76	0.01809	281.76	0.0237	282.59	0.03922
282.14	0.03035	282.11	0.05859	281.92	0.01784	281.92	0.02461	282.75	0.03945
282.3	0.03031	282.28	0.05834	282.08	0.01749	282.09	0.0254	282.91	0.03939
282.45	0.0305	282.44	0.05851	282.25	0.01703	282.25	0.02512	283.08	0.03945
282.62	0.0306	282.59	0.0588	282.41	0.01705	282.41	0.02504	283.24	0.03962
282.78	0.03046	282.75	0.05866	282.56	0.01751	282.56	0.02479	283.39	0.03984
282.94	0.02994	282.91	0.05855	282.72	0.01784	282.72	0.02544	283.55	0.0386
283.09	0.03002	283.08	0.05839	282.87	0.01765	282.89	0.02598	283.7	0.03856
283.25	0.02979	283.23	0.05818	283.05	0.01732	283.05	0.02531	283.87	0.03901
283.42	0.02969	283.39	0.05816	283.2	0.01746	283.2	0.02523	284.03	0.03897
283.58	0.02982	283.55	0.05809	283.36	0.0179	283.36	0.02519	284.19	0.03912
283.73	0.02998	283.72	0.05818	283.51	0.01744	283.51	0.02508	284.34	0.03904
283.89	0.03004	283.87	0.0582	283.67	0.01721	283.69	0.02515	284.5	0.03883
284.05	0.03025	284.03	0.05815	283.84	0.01751	283.84	0.02521	284.67	0.03897
284.22	0.03002	284.19	0.05816	284	0.01777	284	0.02525	284.83	0.03903
284.37	0.03005	284.34	0.0582	284.16	0.0178	284.16	0.02556	284.99	0.03901
284.53	0.02973	284.52	0.05822	284.31	0.01767	284.31	0.02558	285.14	0.03916
284.69	0.02996	284.67	0.05839	284.47	0.0173	284.48	0.02569	285.3	0.03922
284.86	0.0304	284.83	0.05834	284.62	0.01767	284.64	0.02514	285.47	0.03935
285.02	0.03065	284.98	0.05801	284.8	0.01805	284.8	0.02461	285.62	0.0396
285.17	0.03081	285.14	0.05791	284.95	0.01792	284.95	0.02475	285.78	0.03928
285.33	0.03075	285.31	0.05778	285.11	0.01746	285.12	0.02475	285.94	0.03951
285.48	0.03102	285.47	0.05768	285.26	0.0173	285.28	0.02446	286.09	0.03956
285.66	0.03098	285.62	0.05762	285.42	0.01721	285.44	0.02593	286.27	0.03974
285.81	0.03075	285.78	0.05785	285.59	0.01777	285.59	0.02654	286.42	0.03947
285.97	0.03065	285.94	0.05762	285.75	0.01792	285.75	0.02615	286.58	0.03939
286.12	0.03081	286.11	0.05801	285.91	0.01746	285.92	0.02562	286.74	0.03941
286.28	0.03054	286.27	0.05778	286.06	0.01759	286.08	0.02525	286.89	0.03987
286.45	0.03058	286.42	0.0578	286.23	0.01769	286.23	0.02479	287.06	0.0396
286.61	0.03067	286.58	0.05787	286.39	0.01765	286.39	0.02496	287.22	0.03968
286.77	0.03075	286.73	0.05764	286.55	0.01726	286.55	0.02536	287.37	0.04007
286.92	0.03056	286.91	0.05747	286.7	0.01738	286.72	0.02488	287.53	0.03958
287.08	0.03054	287.06	0.05691	286.86	0.01742	286.87	0.0251	287.69	0.03968
287.25	0.03033	287.22	0.05679	287.03	0.018	287.03	0.02475	287.86	0.03991
287.41	0.03009	287.37	0.05753	287.19	0.01794	287.19	0.02432	288.02	0.04012
287.56	0.03011	287.53	0.05811	287.34	0.01748	287.34	0.02432	288.17	0.04012
287.72	0.03015	287.7	0.05832	287.5	0.01738	287.5	0.02396	288.33	0.04003
287.87	0.03002	287.86	0.05853	287.66	0.01788	287.67	0.02401	288.49	0.03987
288.05	0.02998	288.02	0.05853	287.83	0.01823	287.83	0.02415	288.66	0.04009
288.2	0.03071	288.17	0.05832	287.98	0.01767	287.98	0.02398	288.81	0.04051
288.36	0.03048	288.33	0.05837	288.14	0.0174	288.14	0.02388	288.97	0.04034
288.52	0.03052	288.48	0.05826	288.3	0.01744	288.3	0.02421	289.12	0.04067
288.67	0.03015	288.66	0.0582	288.45	0.01771	288.47	0.02415	289.3	0.04103
288.84	0.03042	288.81	0.0583	288.62	0.01813	288.62	0.02405	289.45	0.04095
289	0.03038	288.97	0.05824	288.78	0.01771	288.78	0.02388	289.61	0.04078
289.16	0.0304	289.12	0.05799	288.94	0.01744	288.94	0.02386	289.77	0.04086
289.31	0.03044	289.28	0.0578	289.09	0.01753	289.09	0.02401	289.92	0.04093
289.47	0.03048	289.45	0.05859	289.25	0.018	289.26	0.02444	290.09	0.0409
289.64	0.03044	289.61	0.05872	289.42	0.01763	289.42	0.02508	290.25	0.04082
289.8	0.03038	289.77	0.05882	289.58	0.01746	289.58	0.02438	290.41	0.04101
289.95	0.0306	289.92	0.05845	289.73	0.0174	289.73	0.0245	290.56	0.04184
290.11	0.03031	290.09	0.05834	289.89	0.01761	289.91	0.02432	290.72	0.04178
290.27	0.03025	290.25	0.05843	290.05	0.01771	290.06	0.02421	290.89	0.04148
290.44	0.03035	290.41	0.05843	290.22	0.01782	290.22	0.02442	291.05	0.04155
290.59	0.03002	290.56	0.05864	290.37	0.01713	290.37	0.02444	291.2	0.04198
290.75	0.03	290.72	0.05857	290.53	0.01751	290.53	0.02421	291.36	0.04207
290.91	0.03035	290.89	0.05901	290.69	0.01798	290.7	0.02413	291.52	0.04217
291.06	0.03056	291.05	0.05892	290.86	0.01769	290.86	0.02432	291.67	0.04178
291.23	0.03037	291.2	0.05892	291.01	0.01713	291.01	0.02434	291.84	0.04178
291.39	0.03019	291.36	0.05876	291.17	0.01699	291.17	0.02427	292	0.04173
291.55	0.03031	291.53	0.05855	291.33	0.01732	291.33	0.02423	292.16	0.04159
291.7	0.03031	291.69	0.05815	291.48	0.01777	291.5	0.02477	292.31	0.04157
291.86	0.03046	291.84	0.05824	291.66	0.01798	291.66	0.02448	292.47	0.04151
292.03	0.03061	292	0.05826	291.81	0.01769	291.81	0.02436	292.64	0.04203
292.19	0.0304	292.16	0.05836	291.97	0.01748	291.97	0.02403	292.8	0.0423
292.34	0.03075	292.33	0.05826	292.12	0.01769	292.12	0.02446	292.95	0.04198
292.5	0.03065	292.48	0.05882	292.28	0.01798	292.3	0.02423	293.11	0.04238
292.66	0.03081	292.64	0.05896	292.45	0.0174	292.45	0.0237	293.27	0.04217
292.83	0.03118	292.8	0.05874	292.61	0.01728	292.61	0.024	293.44	0.0425
292.98	0.03104	292.95	0.05878	292.76	0.01779	292.76	0.02407	293.59	0.04219
293.14	0.03067	293.11	0.05849	292.92	0.01807	292.92	0.02423	293.75	0.04238
293.3	0.03013	293.28	0.05855	293.08	0.0178	293.09	0.02421	293.91	0.0425
293.45	0.03002	293.44	0.05832	293.25	0.01744	293.25	0.02442	294.08	0.0419
293.62	0.03033	293.59	0.05866	293.41	0.01742	293.41	0.02448	294.24	0.04184
293.78	0.03021	293.75	0.05866	293.56	0.01788	293.56	0.02432	294.39	0.04223
293.94	0.03029	293.91	0.05872	293.72	0.01809	293.72	0.02442	294.55	0.04221
294.09	0.03042	294.08	0.05876	293.87	0.01775	293.89	0.02517	294.7	0.04225
294.25	0.03029	294.23	0.05896	294.05	0.01742	294.05	0.02488	294.87	0.04219
294.42	0.03044	294.39	0.05878	294.2	0.01728	294.2	0.02469	295.03	0.0423
294.58	0.03071	294.55	0.05857	294.36	0.0173	294.36	0.0245	295.19	0.04257
294.73	0.03019	294.72	0.05857	294.51	0.0178	294.53	0.02471	295.34	0.04238
294.89	0.03037	294.87	0.05866	294.67	0.01757	294.69	0.02519	295.5	0.04254
295.05	0.03027	295.03	0.05839	294.84	0.01713	294.84	0.02467	295.67	0.04259
295.22	0.0304	295.19	0.05849	295	0.01742	295	0.02465	295.83	0.04261
295.37	0.03035	295.34	0.05836	295.16	0.01775	295.16	0.02455	295.99	0.04257
295.53	0.02996	295.52	0.05805	295.31	0.01773	295.33	0.02459	296.14	0.04248
295.69	0.03013	295.67	0.05791	295.48	0.01721	295.48	0.02473	296.3	0.04244
295.86	0.03013	295.83	0.05811	295.64	0.01736	295.64	0.02502	296.47	0.04256
296.02	0.03027	295.98	0.05832	295.8	0.01767	295.8	0.02496	296.62	0.04267
296.17	0.03033	296.14	0.05853	295.95	0.01813	295.95	0.0256	296.78	0.04229
296.33	0.03067	296.31	0.05851	296.11	0.01782	296.12	0.02583	296.94	0.04277
296.48	0.03015	296.47	0.05874	296.28	0.01755	296.28	0.02579	297.09	0.04298
296.66	0.03015	296.62	0.05882	296.44	0.01753	296.44	0.02585	297.27	0.04284
296.81	0.03048	296.78	0.05915	296.59	0.01775	296.59	0.02565	297.42	0.04173
296.97	0.03071	296.94	0.05918	296.75	0.01794	296.75	0.02569	297.58	0.04047
297.12	0.03025	297.11	0.05886	296.91	0.01773	296.92	0.02548	297.74	0.04014
297.28	0.02998	297.27	0.05878	297.08	0.01732	297.08	0.02538	297.89	0.04024
297.45	0.02975	297.42	0.05866	297.23	0.01732	297.23	0.02589	298.06	0.04037
297.61	0.02998	297.58	0.05866	297.39	0.01753	297.39	0.02567	298.22	0.04067
297.77	0.02977	297.73	0.05874	297.55	0.01777	297.55	0.02521	298.37	0.0409
297.92	0.02973	297.91	0.05872	297.7	0.01742	297.72	0.02525	298.53	0.04092
298.08	0.02998	298.06	0.05861	297.87	0.01707	297.87	0.02515	298.7	0.04072
298.25	0.02982	298.22	0.05843	298.03	0.01755	298.03	0.02459	298.86	0.04063
298.41	0.0298	298.37	0.05828	298.19	0.01796	298.19	0.025	299.02	0.04034
298.56	0.02954	298.53	0.05813	298.34	0.01784	298.34	0.02488	299.17	0.04045
298.72	0.02971	298.7	0.05807	298.5	0.01719	298.51	0.02504	299.33	0.04053
298.87	0.02986	298.86	0.05826	298.67	0.01698	298.67	0.0251	299.5	0.04049
299.05	0.03027	299.02	0.05836	298.83	0.01732	298.83	0.02481	299.66	0.04065
299.2	0.03021	299.17	0.05843	298.98	0.01786	298.98	0.02569	299.81	0.04061
299.36	0.03	299.34	0.05866	299.14	0.01749	299.14	0.0256	299.97	0.04063
299.52	0.03	299.5	0.05866	299.3	0.01696	299.31	0.02525	300.12	0.04059
299.67	0.02984	299.66	0.05851	299.47	0.01688	299.47	0.02523	300.3	0.04034
299.84	0.03	299.81	0.05809	299.62	0.01759	299.62	0.02517	300.45	0.04028
300	0.0299	299.97	0.05803	299.78	0.01751	299.78	0.02484	300.61	0.04059
300.16	0.02979	300.14	0.05801	299.94	0.01717	299.94	0.02512	300.77	0.04039
300.31	0.02998	300.3	0.05762	300.09	0.01686	300.11	0.02504	300.92	0.0398
300.47	0.03019	300.45	0.0578	300.25	0.01721	300.26	0.02469	301.09	0.03956
300.64	0.03005	300.61	0.05805	300.42	0.01751	300.42	0.02506	301.25	0.03966
300.8	0.02984	300.77	0.05795	300.58	0.01759	300.58	0.02479	301.41	0.03982
300.95	0.02994	300.94	0.0578	300.73	0.01711	300.75	0.02484	301.56	0.0398
301.11	0.02969	301.09	0.0577	300.89	0.01692	300.91	0.02488	301.72	0.03995
301.27	0.02961	301.25	0.0577	301.05	0.01726	301.06	0.02444	301.89	0.04018
301.44	0.02965	301.41	0.05768	301.22	0.01744	301.22	0.0244	302.05	0.04011
301.59	0.02961	301.56	0.0576	301.37	0.01703	301.37	0.02479	302.2	0.04043
301.75	0.02969	301.73	0.05762	301.53	0.01699	301.55	0.0245	302.36	0.04032
301.91	0.02959	301.89	0.05753	301.69	0.01678	301.7	0.02425	302.53	0.04043
302.06	0.02961	302.05	0.0576	301.86	0.01711	301.86	0.02461	302.69	0.0403
302.23	0.02965	302.2	0.05778	302.01	0.01771	302.01	0.02452	302.84	0.04043
302.39	0.03011	302.36	0.05753	302.17	0.01732	302.17	0.02444	303	0.04065
302.55	0.02992	302.53	0.05778	302.33	0.01694	302.34	0.02444	303.17	0.04051
302.7	0.02992	302.69	0.05755	302.48	0.01682	302.5	0.02498	303.33	0.04043
302.86	0.02994	302.84	0.05762	302.66	0.01759	302.66	0.02506	303.49	0.04039
303.03	0.03013	303	0.0577	302.81	0.01769	302.81	0.02457	303.64	0.04028
303.19	0.02998	303.17	0.05724	302.97	0.01721	302.97	0.02429	303.8	0.04022
303.34	0.02984	303.33	0.0573	303.12	0.01699	303.12	0.02467	303.97	0.04043
303.5	0.02956	303.48	0.05755	303.28	0.01692	303.3	0.02477	304.12	0.04053
303.66	0.02936	303.64	0.05741	303.45	0.01769	303.45	0.02494	304.28	0.04045
303.83	0.02969	303.81	0.05789	303.61	0.01744	303.61	0.025	304.44	0.04047
303.98	0.03007	303.97	0.05764	303.76	0.01705	303.76	0.02523	304.59	0.04012
304.14	0.02994	304.12	0.05751	303.92	0.01707	303.94	0.02542	304.77	0.03991
304.3	0.03007	304.28	0.05712	304.08	0.01717	304.09	0.02494	304.92	0.03991
304.45	0.02988	304.44	0.05687	304.25	0.01755	304.25	0.0251	305.08	0.03987
304.62	0.02994	304.61	0.05689	304.41	0.01721	304.41	0.02525	305.24	0.03976
304.78	0.0298	304.77	0.05687	304.56	0.01701	304.56	0.02512	305.41	0.03974
304.94	0.02957	304.92	0.05718	304.72	0.01696	304.73	0.02523	305.56	0.03985
305.09	0.02936	305.08	0.05751	304.89	0.01759	304.89	0.02546	305.72	0.04014
305.25	0.02921	305.23	0.05745	305.05	0.01771	305.05	0.02504	305.89	0.04003
305.42	0.02911	305.41	0.05739	305.2	0.01715	305.2	0.02457	306.05	0.03999
305.58	0.02923	305.56	0.0578	305.36	0.0169	305.37	0.02506	306.2	0.03995
305.73	0.0294	305.72	0.05787	305.51	0.01728	305.53	0.025	306.37	0.03991
305.91	0.02944	305.87	0.05776	305.69	0.01771	305.69	0.02465	306.53	0.03974
306.06	0.02954	306.03	0.05743	305.84	0.01751	305.84	0.02484	306.69	0.03985
306.22	0.02963	306.2	0.0576	306	0.01701	306	0.02488	306.84	0.04001
306.37	0.02963	306.36	0.05783	306.16	0.0167	306.17	0.02496	307.02	0.0398
306.55	0.0298	306.52	0.05809	306.33	0.01711	306.33	0.02506	307.17	0.04018
306.7	0.0299	306.67	0.05778	306.48	0.01769	306.48	0.02492	307.33	0.04014
306.86	0.02988	306.84	0.05762	306.64	0.01732	306.64	0.02477	307.5	0.03995
307.03	0.02988	307	0.0576	306.8	0.01672	306.81	0.02473	307.66	0.04011
307.19	0.02977	307.16	0.0576	306.95	0.0169	306.97	0.02471	307.81	0.04009
307.34	0.02973	307.31	0.05743	307.12	0.01724	307.12	0.02463	307.99	0.03982
307.5	0.02977	307.48	0.05649	307.28	0.01719	307.28	0.02444	308.14	0.03985
307.67	0.02948	307.64	0.05714	307.44	0.01719	307.45	0.02465	308.3	0.03993
307.83	0.02938	307.8	0.05753	307.59	0.0168	307.61	0.02471	308.47	0.03987
308	0.0295	307.95	0.05737	307.75	0.01682	307.76	0.02483	308.62	0.04003
308.16	0.02944	308.12	0.05745	307.92	0.01709	307.92	0.02479	308.78	0.04026
308.31	0.02888	308.28	0.05745	308.08	0.0174	308.09	0.0249	308.94	0.04045
308.48	0.02903	308.44	0.05743	308.23	0.01676	308.25	0.02494	309.11	0.04045
308.64	0.02919	308.59	0.05766	308.39	0.01672	308.41	0.0245	309.27	0.04014
308.8	0.02907	308.75	0.05813	308.56	0.01717	308.56	0.02469	309.42	0.04035
308.95	0.02913	308.92	0.05787	308.72	0.01724	308.72	0.02469	309.59	0.04007
309.12	0.02897	309.08	0.0576	308.87	0.0173	308.89	0.02442	309.75	0.04034
309.28	0.02897	309.23	0.0571	309.03	0.01694	309.05	0.02423	309.91	0.04035
309.44	0.02869	309.41	0.05687	309.2	0.01701	309.2	0.0245	310.08	0.04053
309.61	0.02919	309.56	0.05691	309.36	0.01755	309.37	0.02475	310.24	0.04053
309.77	0.02884	309.72	0.05724	309.51	0.01757	309.53	0.02486	310.39	0.04063
309.92	0.02863	309.87	0.05716	309.69	0.01713	309.69	0.025	310.56	0.0408
310.08	0.02861	310.05	0.05693	309.84	0.01692	309.86	0.02438	310.72	0.04074
310.25	0.02882	310.2	0.05762	310	0.01682	310.01	0.0244	310.87	0.04082
310.41	0.02871	310.36	0.05782	310.17	0.01726	310.17	0.02446	311.05	0.04078
310.58	0.02851	310.53	0.05755	310.33	0.01713	310.34	0.02431	311.2	0.04099
310.73	0.02869	310.69	0.05791	310.48	0.01701	310.5	0.0245	311.36	0.04118
310.89	0.02917	310.84	0.05749	310.66	0.01684	310.66	0.02453	311.52	0.04124
311.05	0.02882	311.02	0.05737	310.81	0.01715	310.83	0.02486	311.69	0.04138
311.2	0.02882	311.17	0.05741	310.97	0.0174	310.98	0.02481	311.84	0.04107
311.37	0.02938	311.33	0.05739	311.12	0.01713	311.14	0.02494	312	0.04144
311.53	0.02899	311.48	0.05635	311.3	0.01692	311.3	0.0249	312.17	0.04148
311.7	0.02905	311.66	0.05554	311.45	0.01707	311.47	0.02477	312.33	0.04194
[truncated: 8,264 more rows]
